# Supplementary material for: Aqueous Sonogashira coupling of aryl halides with 1-alkynes under mild conditions: use of surfactants in cross-coupling reactions
Source: Royal Society of Chemistry journal article supplement (doi:10.1039/c5ra00505a), 2015-01-01

SUPPORTING INFORMATION

Aqueous Sonogashira Coupling of Aryl Halides with 1-Alkynes Under Mild Conditions:

Use of Surfactants in Cross-Coupling Reactions

Gina M. Roberts, Wenya Lu, L. Keith Woo

Department of Chemistry, Iowa State University, Ames, Iowa 50011-3111

**Table S1.** The Effect of CTAB concentration on Sonogashira coupling yields for aryl-iodide and bromide reagents at 40 °C.

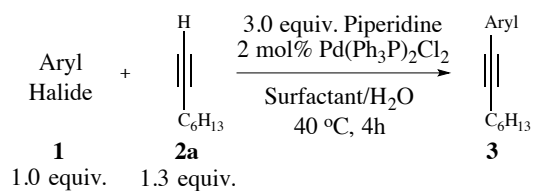

| Entry | Aryl Halide        | CTAB<br>(w/v%) | % Yield <b>3</b> |                    |
|-------|--------------------|----------------|------------------|--------------------|
|       |                    |                | (No CuI)         | (CuI) <sup>b</sup> |
| 1     | 1-iodoanisole      | 0.0            | -                | 30                 |
| 2     | 1-iodoanisole      | 0.5            | -                | 44                 |
| 3     | 1-iodoanisole      | 1.0            | -                | 71                 |
| 4     | 1-iodoanisole      | 1.5            | -                | 86                 |
| 5     | 1-iodoanisole      | 2.0            | -                | 92                 |
| 6     | 4-bromonbenzotrile | 0.0            | 0                | -                  |
| 7     | 4-bromonbenzotrile | 0.5            | 9                | -                  |
| 8     | 4-bromonbenzotrile | 1.0            | 38               | -                  |
| 9     | 4-bromonbenzotrile | 1.5            | 42               | -                  |
| 10    | 4-bromonbenzotrile | 2.0            | 57               | -                  |

Reaction conditions: 0.08 mmol aryl halide, 0.1 mmol 1-octyne, 0.24 mmol piperidine, 2.0 mol%

Pd(PPh<sub>3</sub>)<sub>2</sub>Cl<sub>2</sub>, 0.8 mL CTAB in H<sub>2</sub>O, 40 °C, 4 h; <sup>a</sup>Average <sup>1</sup>H NMR yields for duplicate runs (±3).

<sup>b</sup> 5 mol% CuI.

**Table S2.** The Effect of SDS concentration on Sonogashira coupling yields for aryl-iodide and bromide reagents at 40 °C.

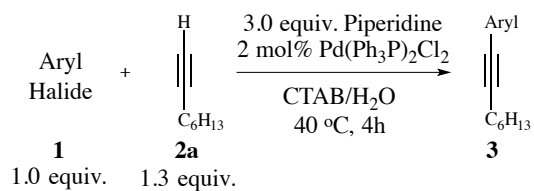

| Entry | Aryl Halide        | SDS<br>(w/v%) | % Yield <b>3</b> |                    |
|-------|--------------------|---------------|------------------|--------------------|
|       |                    |               | (No CuI)         | (CuI) <sup>b</sup> |
| 1     | 1-iodoanisole      | 0.0           | -                | 30                 |
| 2     | 1-iodoanisole      | 0.5           | -                | 32                 |
| 3     | 1-iodoanisole      | 1.0           | -                | 68                 |
| 4     | 1-iodoanisole      | 2.0           | -                | 85                 |
| 5     | 1-iodoanisole      | 4.0           | -                | 88                 |
| 6     | 1-iodoanisole      | 8.0           | -                | 79                 |
| 7     | 4-bromonbenzotrile | 0.0           | 0                | -                  |
| 8     | 4-bromonbenzotrile | 0.5           | 11               | -                  |
| 9     | 4-bromonbenzotrile | 1.0           | 34               | -                  |
| 10    | 4-bromonbenzotrile | 2.0           | 55               | -                  |
| 11    | 4-bromonbenzotrile | 4.0           | 52               | -                  |
| 12    | 4-bromonbenzotrile | 8.0           | 49               | -                  |

Reaction conditions: 0.08 mmol aryl halide, 0.1 mmol 1-octyne, 0.24 mmol piperidine, 2.0 mol% Pd(PPh<sub>3</sub>)<sub>2</sub>Cl<sub>2</sub>, 0.8 mL SDS in H<sub>2</sub>O, 40 °C, 4 h; <sup>a</sup>Average <sup>1</sup>H NMR yields for duplicate runs (±3). <sup>b</sup> 5 mol% CuI.

**Table S3.** Base Screening for the Sonogashira Coupling of Aryl Halides with 1-Octyne.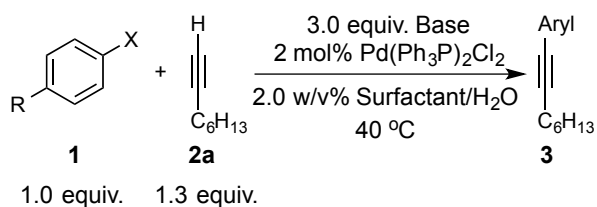

| Entry <sup>a</sup> | R   | X  | Surfactant | Base                            | % Yield <b>3</b> <sup>b</sup> |          |
|--------------------|-----|----|------------|---------------------------------|-------------------------------|----------|
|                    |     |    |            |                                 | (CuI) <sup>c</sup>            | (No CuI) |
| 1                  | OMe | I  | SDS        | Piperidine                      | 85                            | 30       |
| 2                  | OMe | I  | CTAB       | Piperidine                      | 92                            | 38       |
| 3                  | OMe | I  | SDS        | Pyrrolidine                     | 81                            | 32       |
| 4                  | OMe | I  | CTAB       | Pyrrolidine                     | 75                            | 33       |
| 5                  | OMe | I  | SDS        | NEt <sub>3</sub>                | 87                            | 22       |
| 6                  | OMe | I  | CTAB       | NEt <sub>3</sub>                | 90                            | 17       |
| 7                  | OMe | I  | SDS        | Cs <sub>2</sub> CO <sub>3</sub> | 21                            | 15       |
| 8                  | OMe | I  | CTAB       | Cs <sub>2</sub> CO <sub>3</sub> | 10                            | 12       |
| 9                  | CN  | Br | SDS        | Piperidine                      | 18                            | 40       |
| 10                 | CN  | Br | CTAB       | Piperidine                      | 31                            | 59       |
| 11                 | CN  | Br | SDS        | Pyrrolidine                     | 20                            | 26       |
| 12                 | CN  | Br | CTAB       | Pyrrolidine                     | 18                            | 55       |
| 13                 | CN  | Br | SDS        | NEt <sub>3</sub>                | 23                            | 57       |
| 14                 | CN  | Br | CTAB       | NEt <sub>3</sub>                | 20                            | 60       |
| 15                 | CN  | Br | SDS        | Cs <sub>2</sub> CO <sub>3</sub> | 9                             | 10       |
| 16                 | CN  | Br | CTAB       | Cs <sub>2</sub> CO <sub>3</sub> | 24                            | 17       |

Reaction conditions: 0.08 mmol aryl halide, 0.1 mmol 1-octyne, 0.24 mmol base, 2.0 mol% Pd(PPh<sub>3</sub>)<sub>2</sub>Cl<sub>2</sub>, 0.8 mL surfactant (2.0 w/v% in H<sub>2</sub>O), 40 °C; <sup>a</sup>Rxn 1-8 ran 4 h, Rxn 9-16 ran 12 h; <sup>b</sup>Average <sup>1</sup>H NMR yields for duplicate runs (±3). <sup>c</sup>5 mol% CuI.



**Table S4.** Solution pH values for SDS, CTAB, Sodium Cholate and Triton X-100 for Sonogashira Reactions.

| Surfactant     | Temp (°C) | Piperidine (mmol) | pH   |
|----------------|-----------|-------------------|------|
| Sodium Cholate | RT        | -                 | 7.8  |
| Sodium Cholate | 40        | -                 | 8.3  |
| Sodium Cholate | RT        | 2.4               | 11.6 |
| Sodium Cholate | 40        | 2.4               | 11.1 |
| CTAB           | RT        | -                 | 6.5  |
| CTAB           | 40        | -                 | 6.2  |
| CTAB           | RT        | 2.4               | 11.5 |
| CTAB           | 40        | 2.4               | 11.1 |
| SDS            | RT        | -                 | 8.4  |
| SDS            | 40        | -                 | 8.5  |
| SDS            | RT        | 2.4               | 11.7 |
| SDS            | 40        | 2.4               | 10.7 |
| Triton X-100   | RT        | -                 | 6.0  |
| Triton X-100   | 40        | -                 | 7.2  |
| Triton X-100   | RT        | 2.4               | 11.6 |
| Triton X-100   | 40        | 2.4               | 11.0 |

Conditions: 2.0 w/v% solution of surfactant in water with and without piperidine. The pH remained constant over 5 h at RT and 40 °C for each entry.

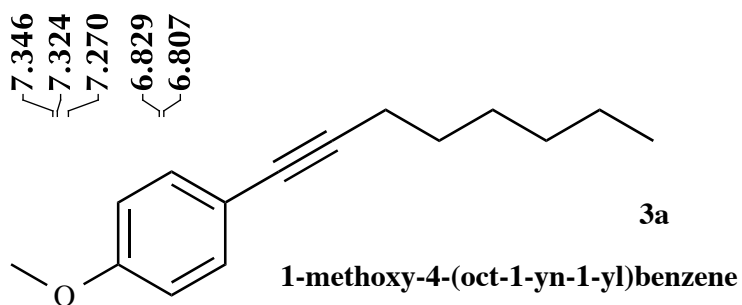

$^1\text{H}$  NMR (400 MHz,  $\text{CDCl}_3$ )  $\delta$  (ppm): 7.34 (d,  $J = 8.8$  Hz, 2H), 6.82 (d,  $J = 8.8$  Hz, 2H), 3.81 (s, 3H), 2.39 (t,  $J = 6.6$  Hz, 2H), 1.63-1.54 (m, 2H), 1.50-1.41 (m, 2H), 1.37-1.29 (m, 4H), 0.91 (t,  $J = 6.0$  Hz, 2H)

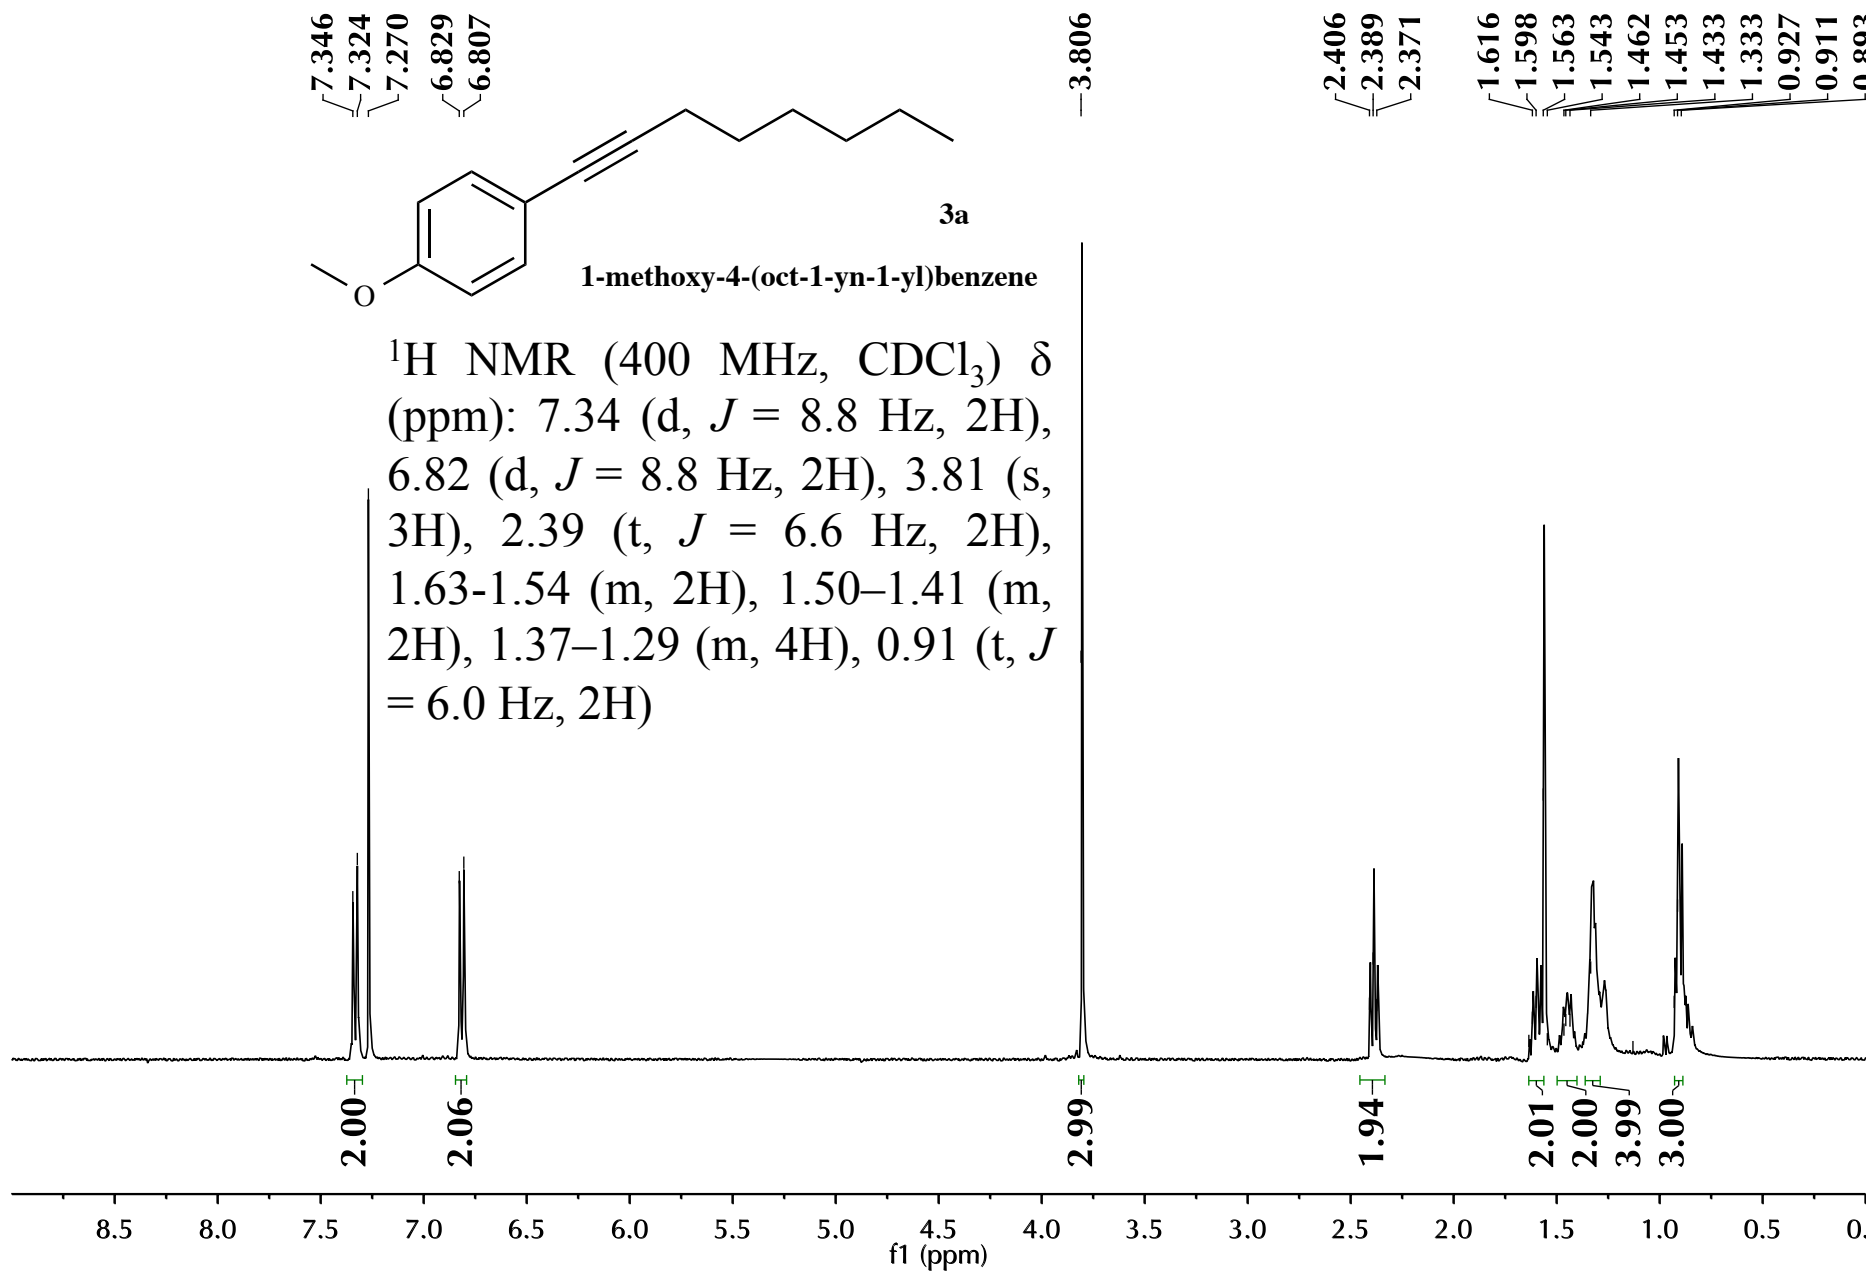

**3a**

gmr-06-25-01 640 (7.326) Cm (640-637:638x1.050)

**25-Jun-2014**

TOF MS EI+  
1.94e3

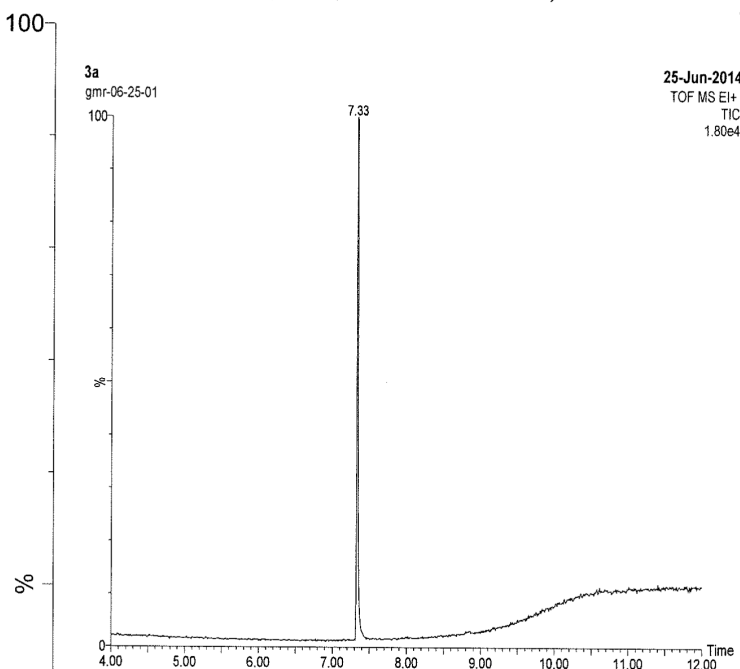

25-Jun-2014  
TOF MS EI+  
TIC  
1.80e4

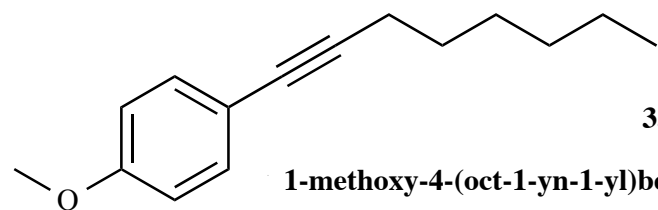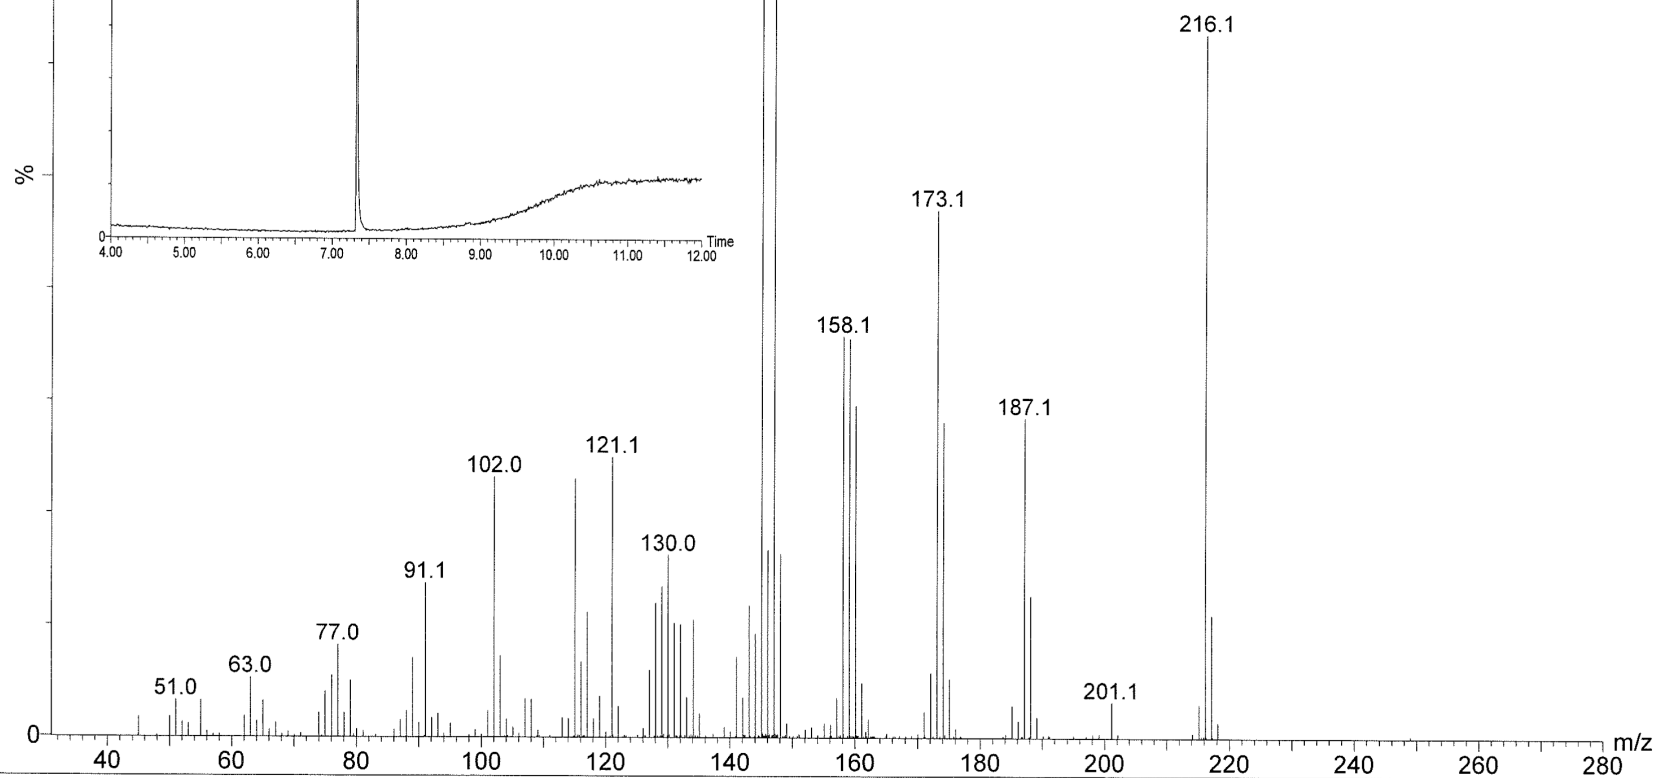

7.536  
7.515  
7.496  
7.473  
7.352  
7.332  
7.269  
6.903  
6.880

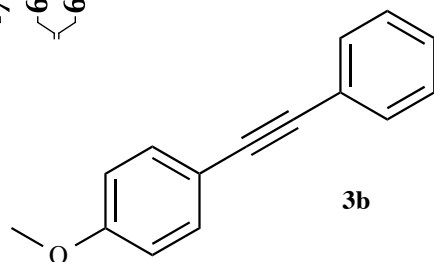

1-methoxy-4-(phenylethynyl)benzene

$^1\text{H}$  NMR (400 MHz,  $\text{CDCl}_3$ )  $\delta$  (ppm):  
7.54–7.51 (m, 2H), 7.48 (d,  $J = 9.0$  Hz, 2H), 7.37–7.30 (m, 3H), 6.89 (d,  $J = 9.0$  Hz, 2H), 3.84 (s, 3H)

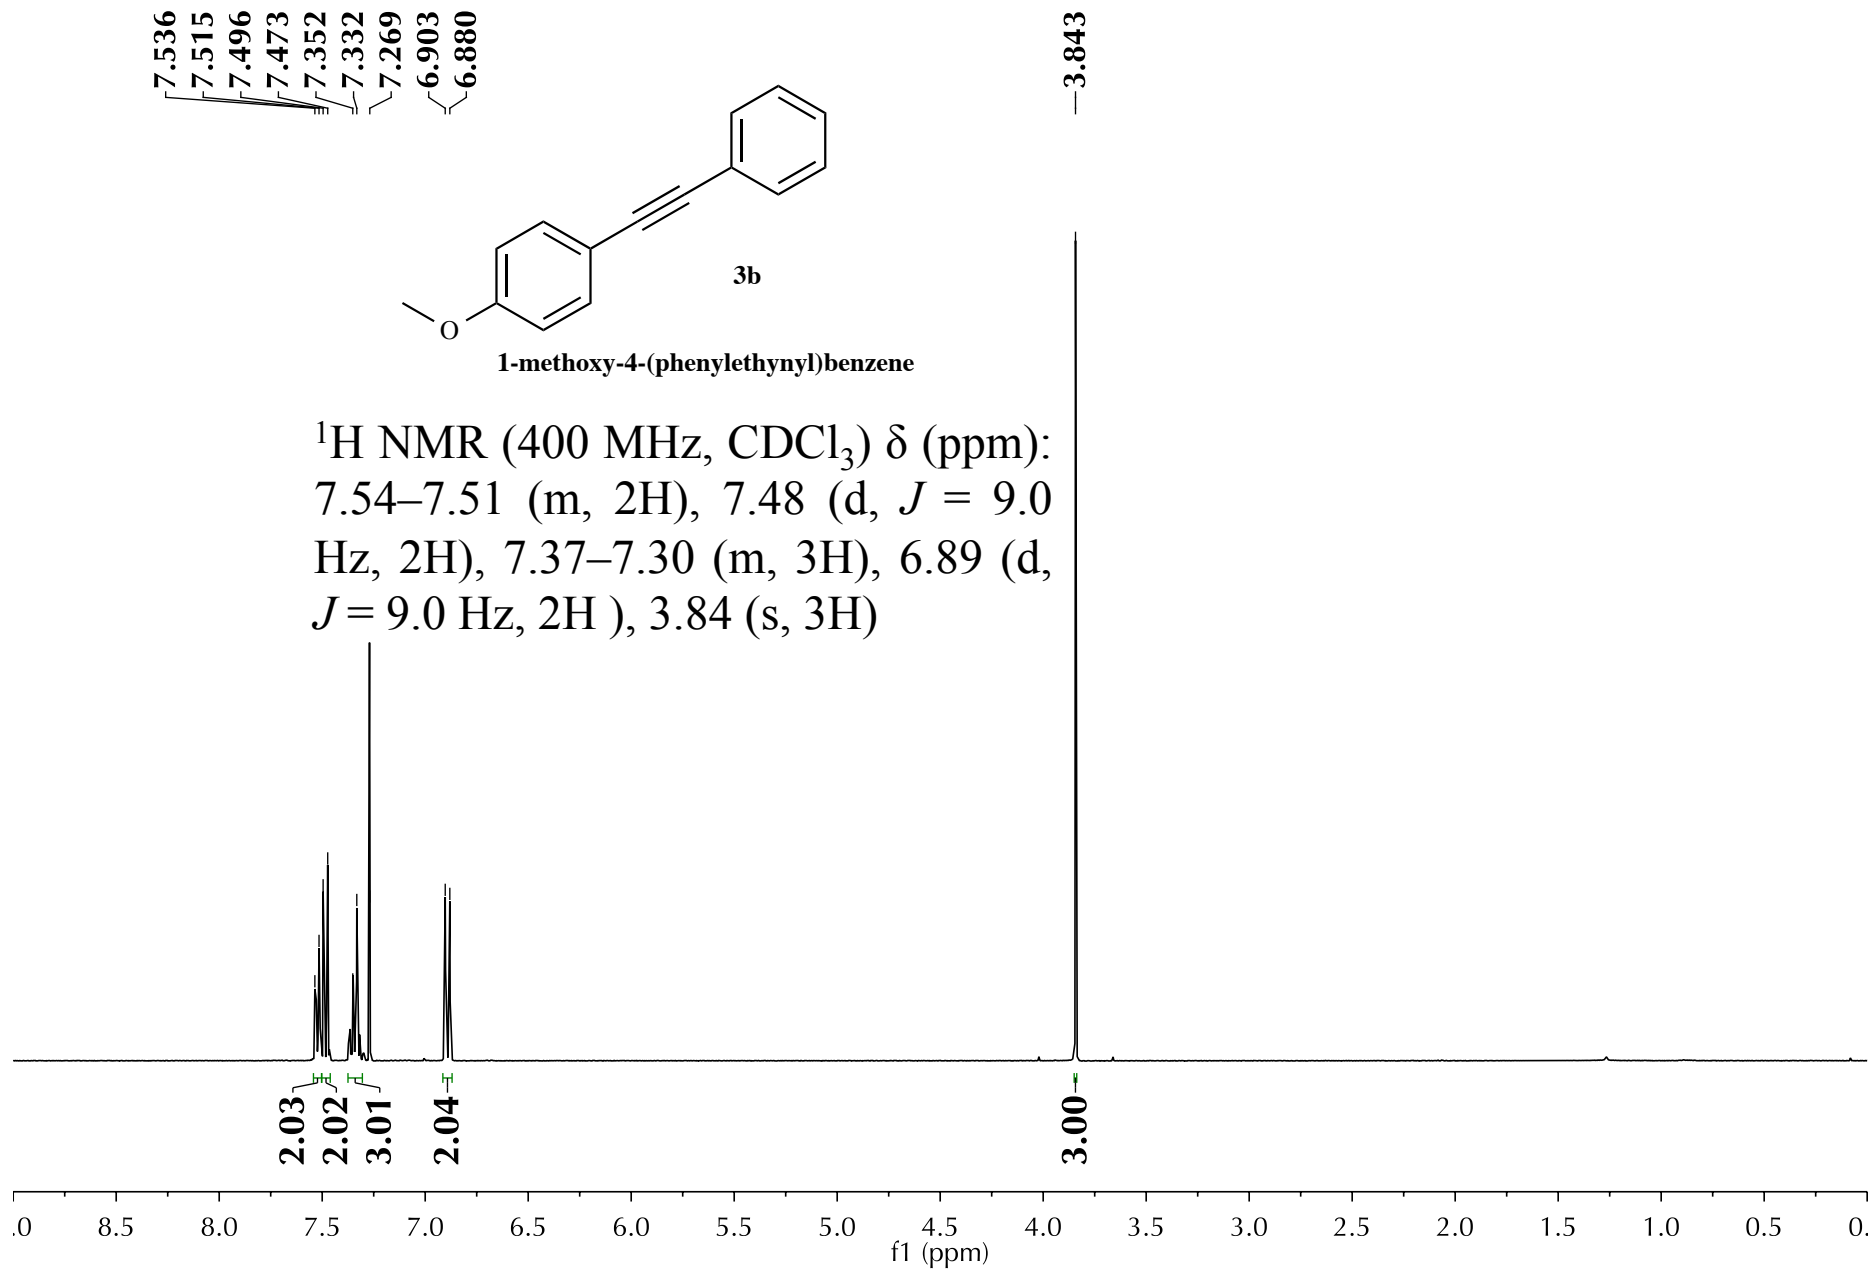

**3b**

gmr-06-25-02 720 (8.000) Cm ((715+720)-(714+721:722)x1.050)

**25-Jun-2014**

TOF MS EI+

1.10e3

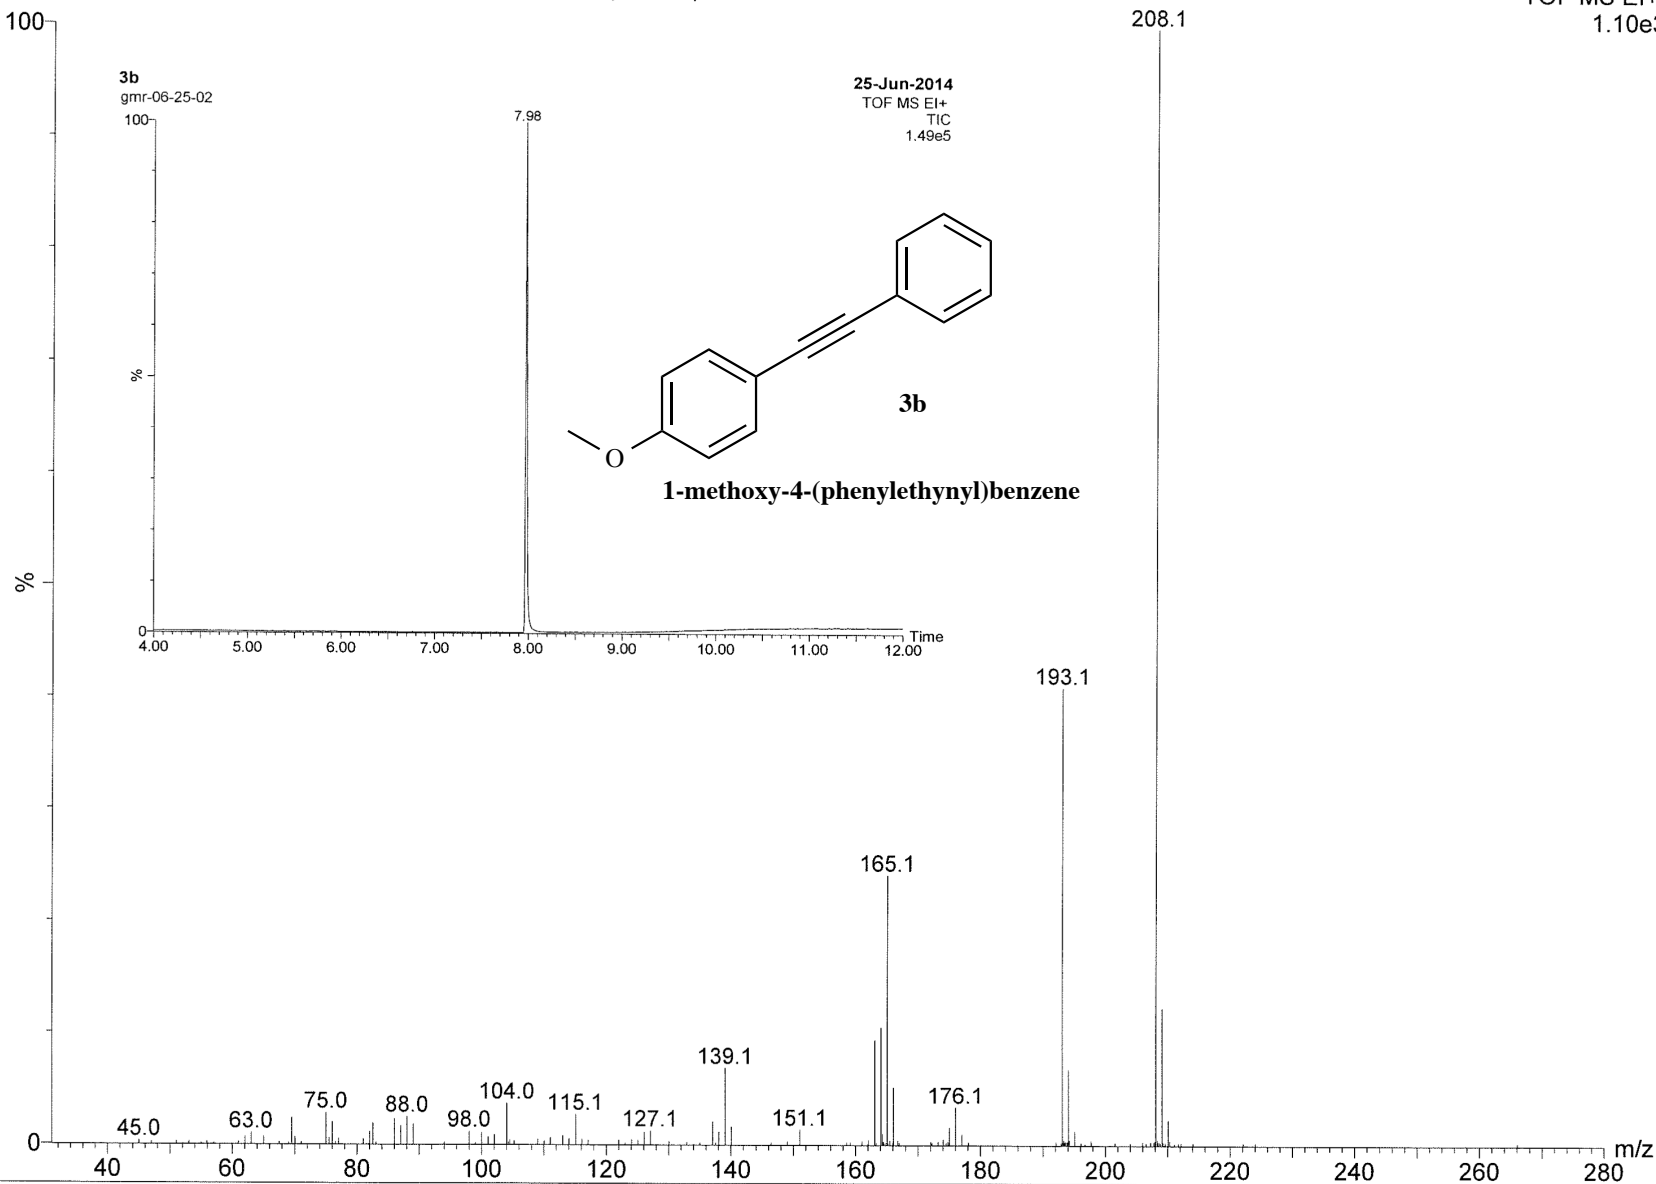

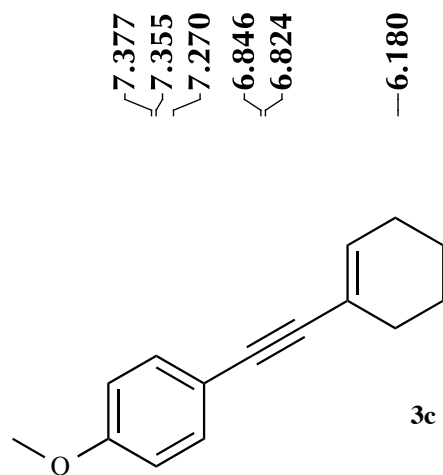

**1-(cyclohex-1-en-1-ylethynyl)-4-methoxybenzene**

$^1\text{H}$  NMR (400 MHz,  $\text{CDCl}_3$ )  $\delta$  (ppm): 7.36 (d,  $J = 8.8$  Hz, 2H), 6.83 (d,  $J = 8.8$  Hz, 2H), 6.21–6.18 (m, 1H), 3.81 (m, 3H), 2.26–2.20 (m, 2H), 2.18–2.12 (m, 2H), 1.73–1.56 (m, 4H)

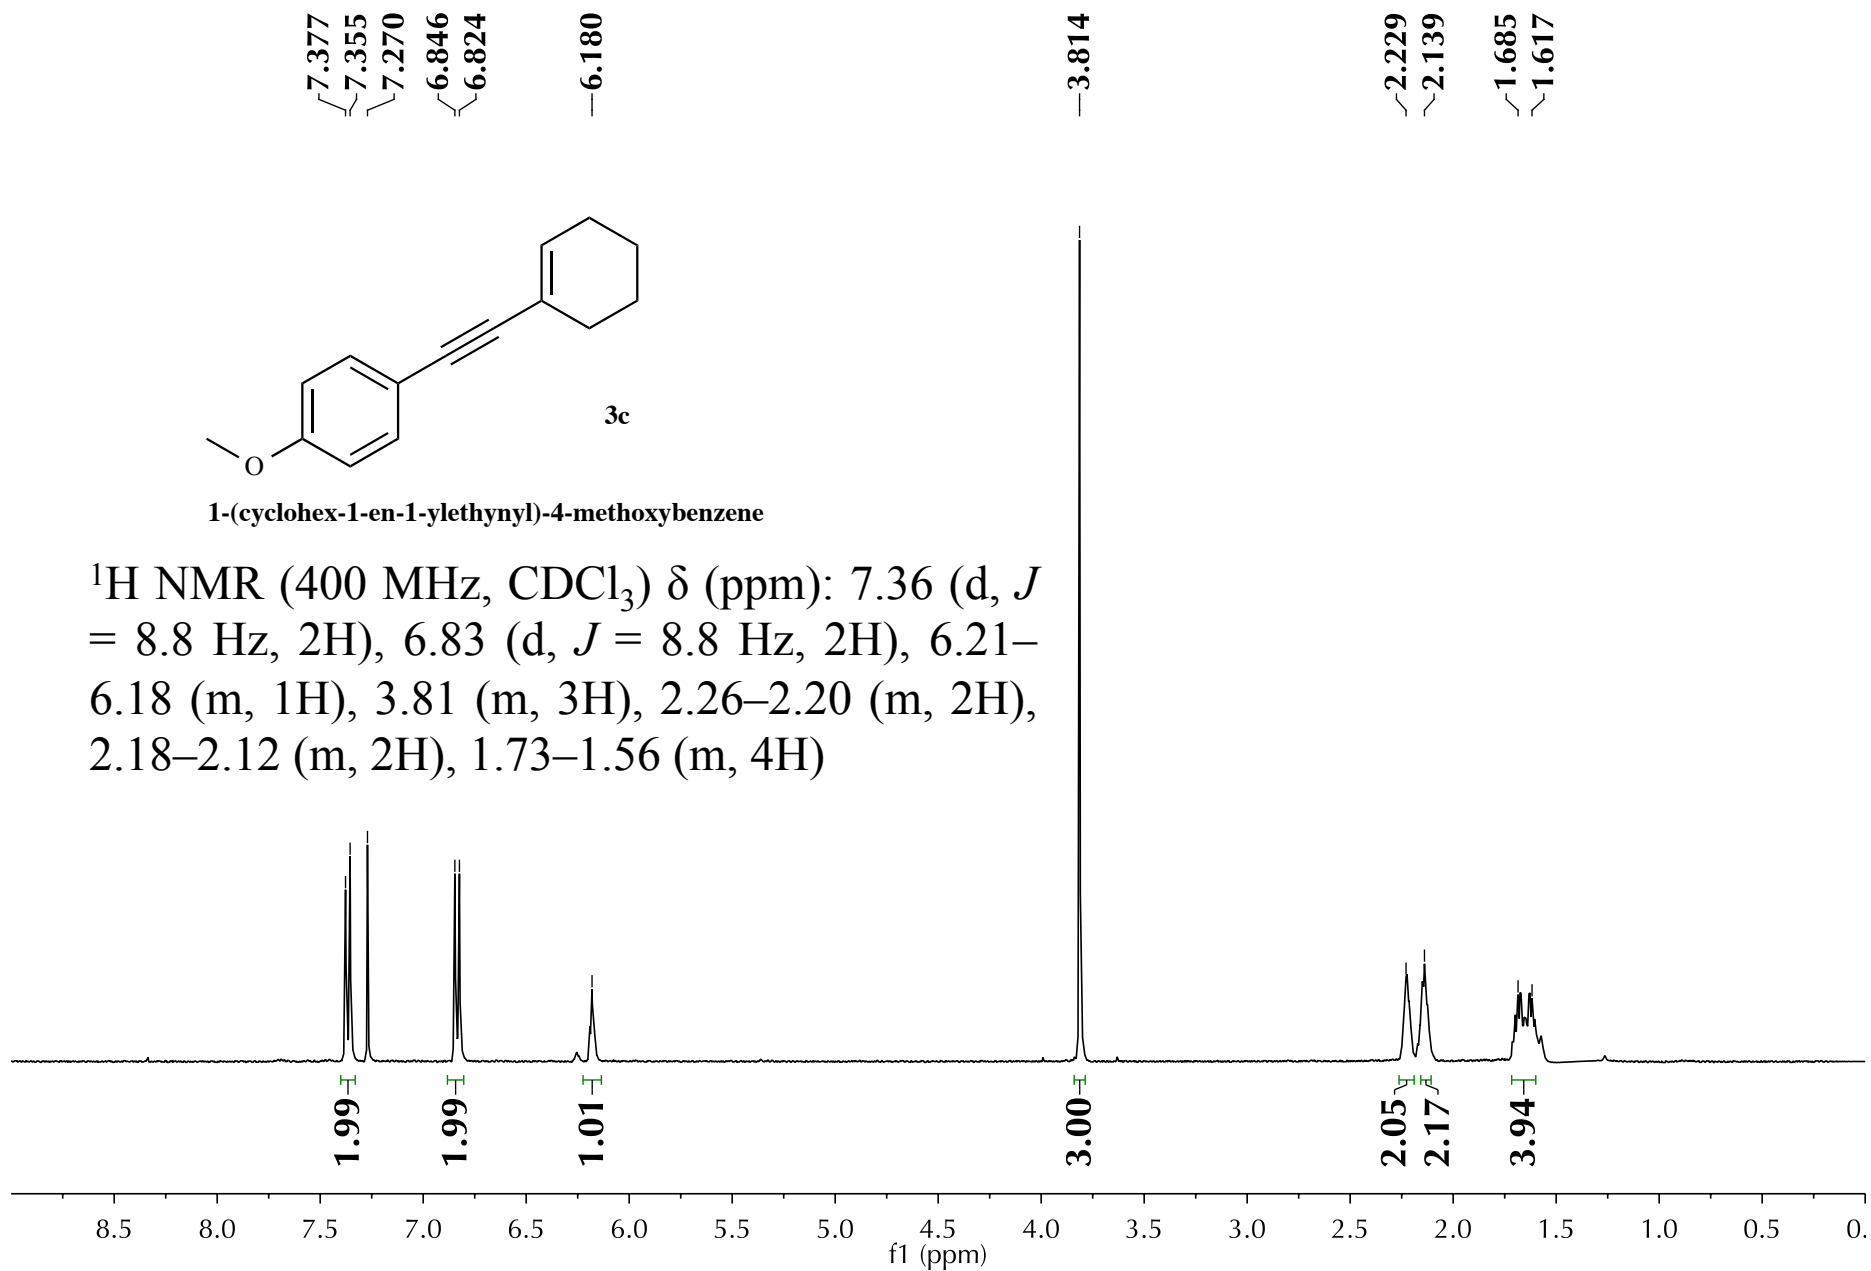

**3c**

lw-06-27-07 1338 (12.944) Cm ((1338+1342)-(1337+1343)x1.050)

**27-Jun-2012**

TOF MS EI+  
1.44e4

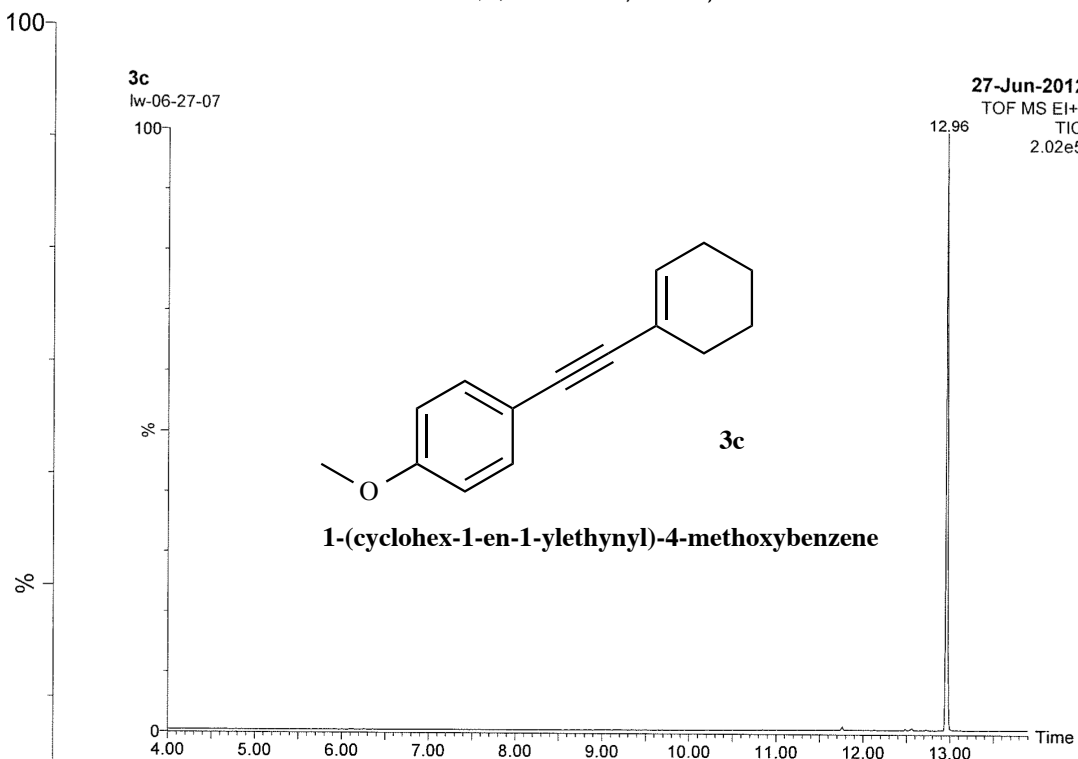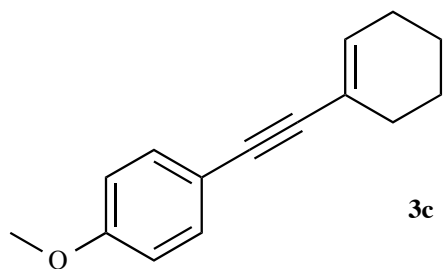

**1-(cyclohex-1-en-1-ylethynyl)-4-methoxybenzene**

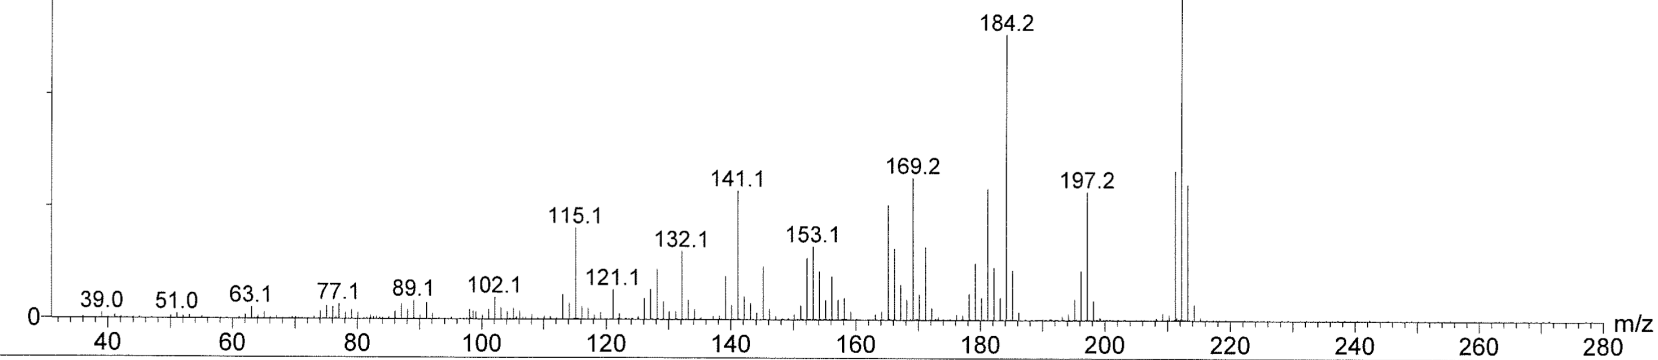

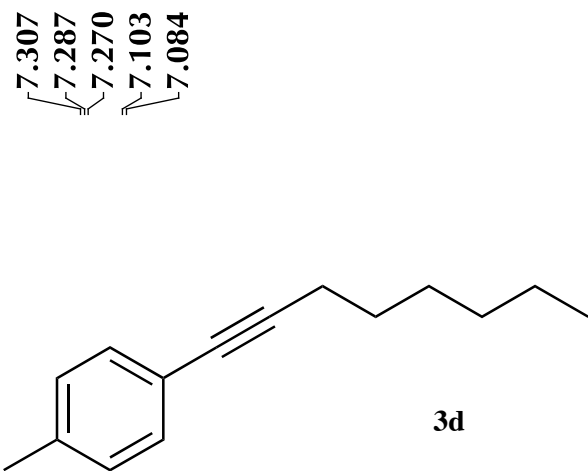

**1-methyl-4-(oct-1-yn-1-yl)benzene**

$^1\text{H}$  NMR (400 MHz,  $\text{CDCl}_3$ )  $\delta$  (ppm): 7.29 (d,  $J = 8.0$  Hz, 2H), 7.09 (d,  $J = 8.0$  Hz, 2H), 2.41 (t,  $J = 7.0$  Hz, 2H), 2.34 (s, 3H), 1.67–1.58 (m, 2H), 1.48–1.44 (m, 2H), 1.36–1.28 (m, 4H), 0.92 (t,  $J = 5.6$  Hz, 3H)

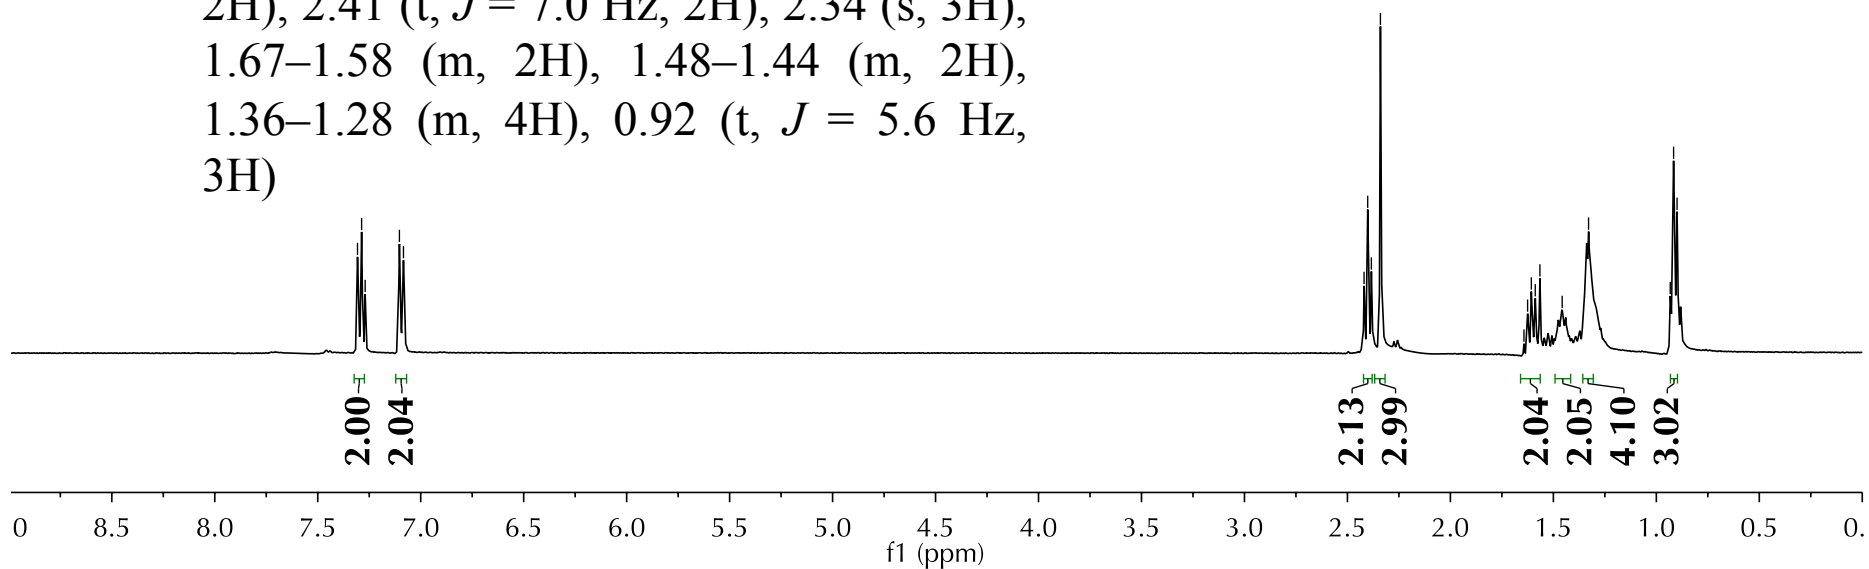

2.419  
2.402  
2.384  
2.340  
1.643  
1.625  
1.607  
1.588  
1.565  
1.457  
1.329  
0.932  
0.916  
0.899



3d

lw-06-22-14 1058 (10.618) Cm ((1058+1062)-(1056+1063)x1.050)

22-Jun-2012

TOF MS EI+  
3.40e3

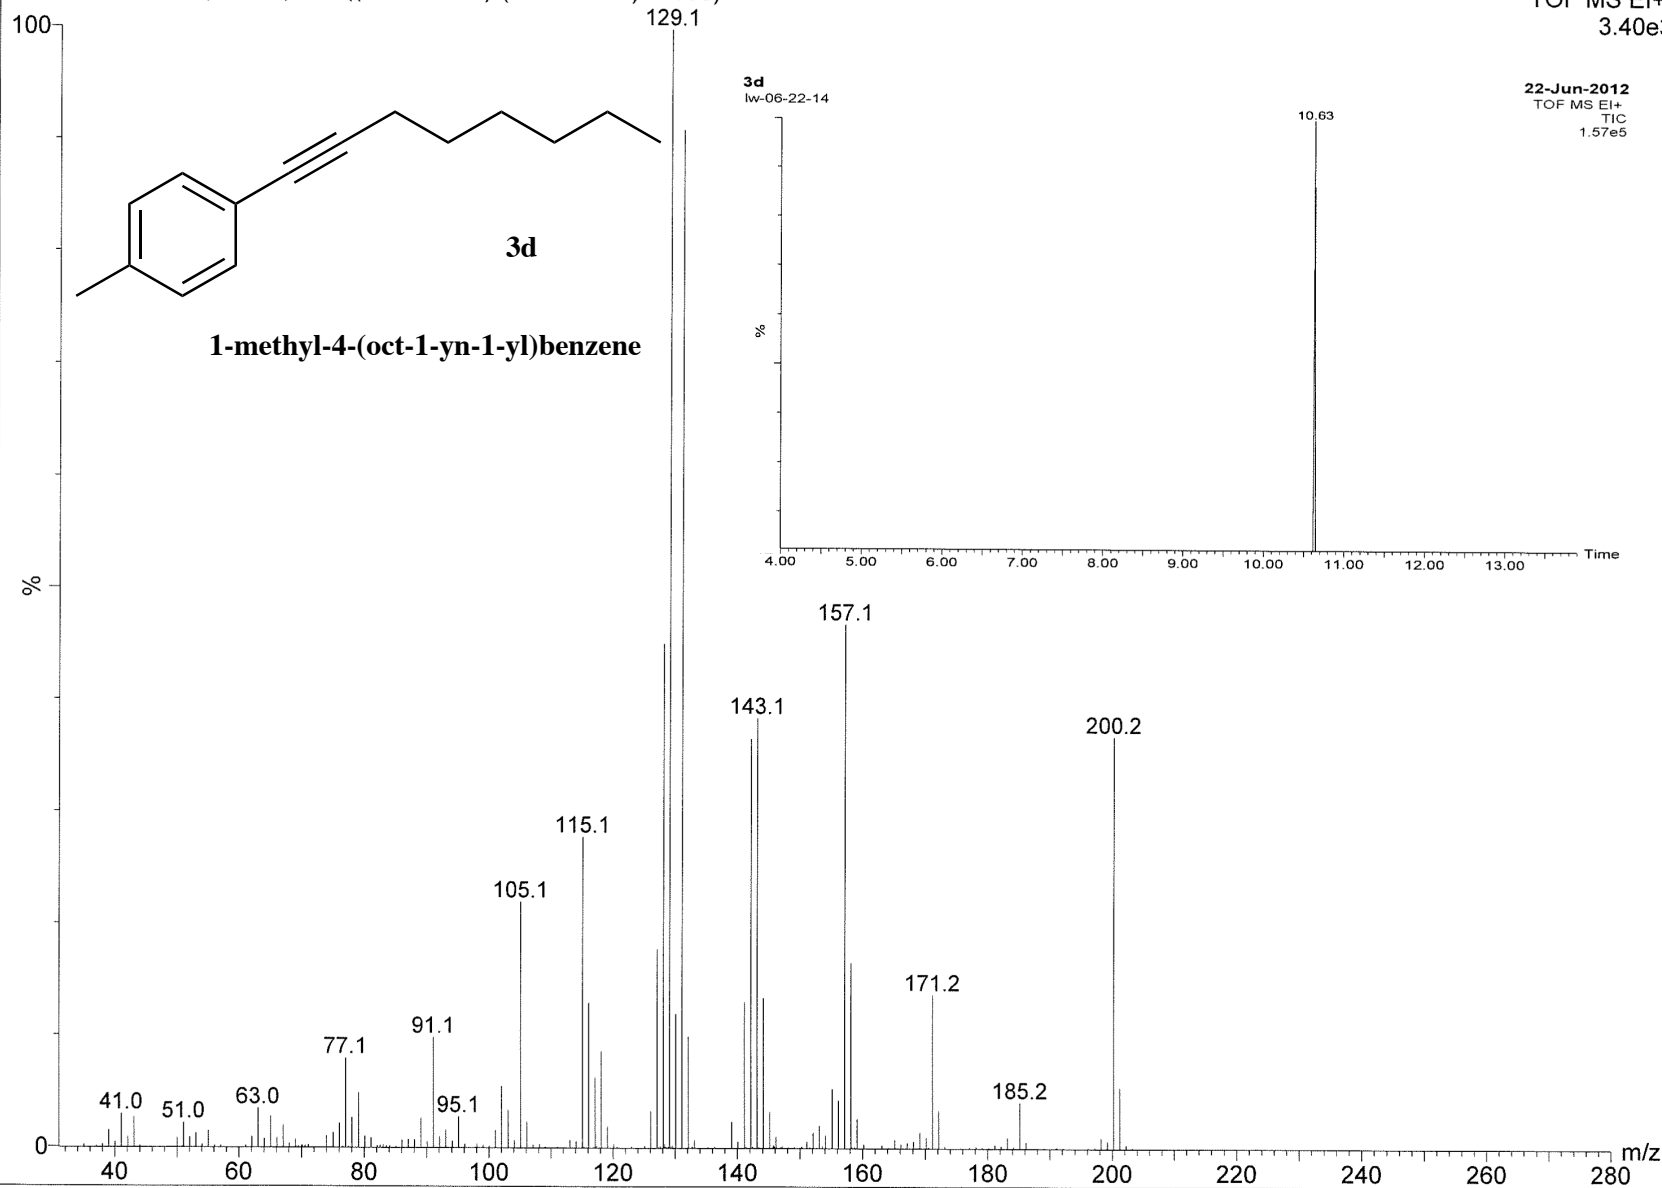

7.545  
7.526  
7.449  
7.429  
7.355  
7.340  
7.178  
7.158

2.381

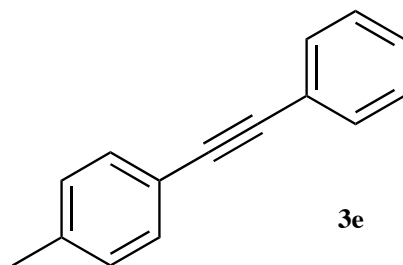

1-methyl-4-(phenylethynyl)benzene

$^1\text{H}$  NMR (400 MHz,  $\text{CDCl}_3$ )  $\delta$  (ppm):  
7.55–7.52 (m, 2H), 7.44 (d,  $J = 8.0$  Hz, 2H), 7.38–7.32 (m, 3H), 7.16 (d,  $J = 8.0$  Hz, 2H), 2.38 (s, 3H)

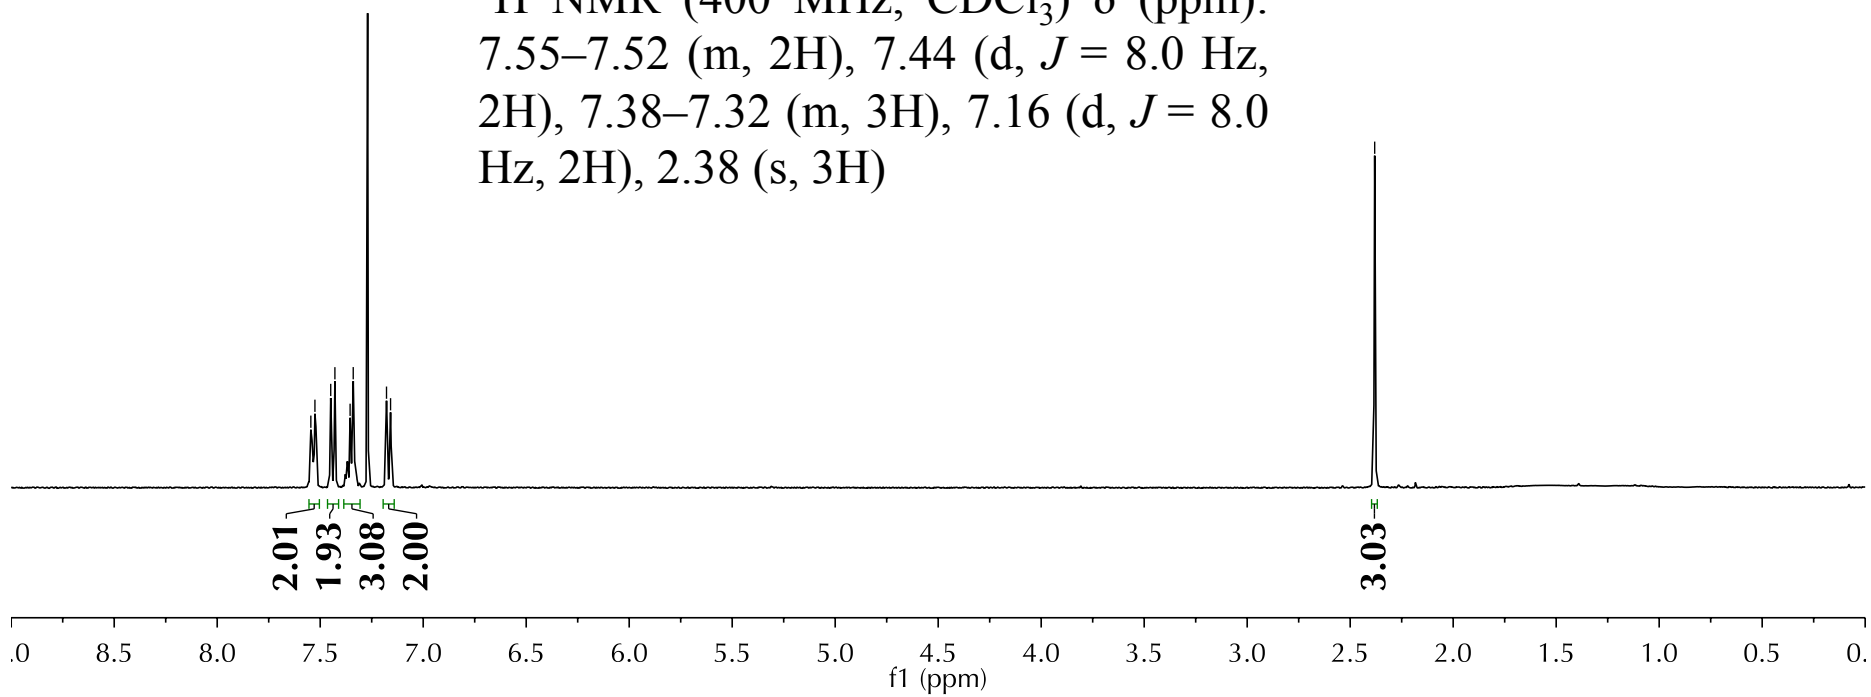

3e

lw-06-27-06 1179 (11.625) Cm ((1179+1183)-(1177:1178+1184:1185)x1.050)

27-Jun-2012

TOF MS EI+  
1.26e4

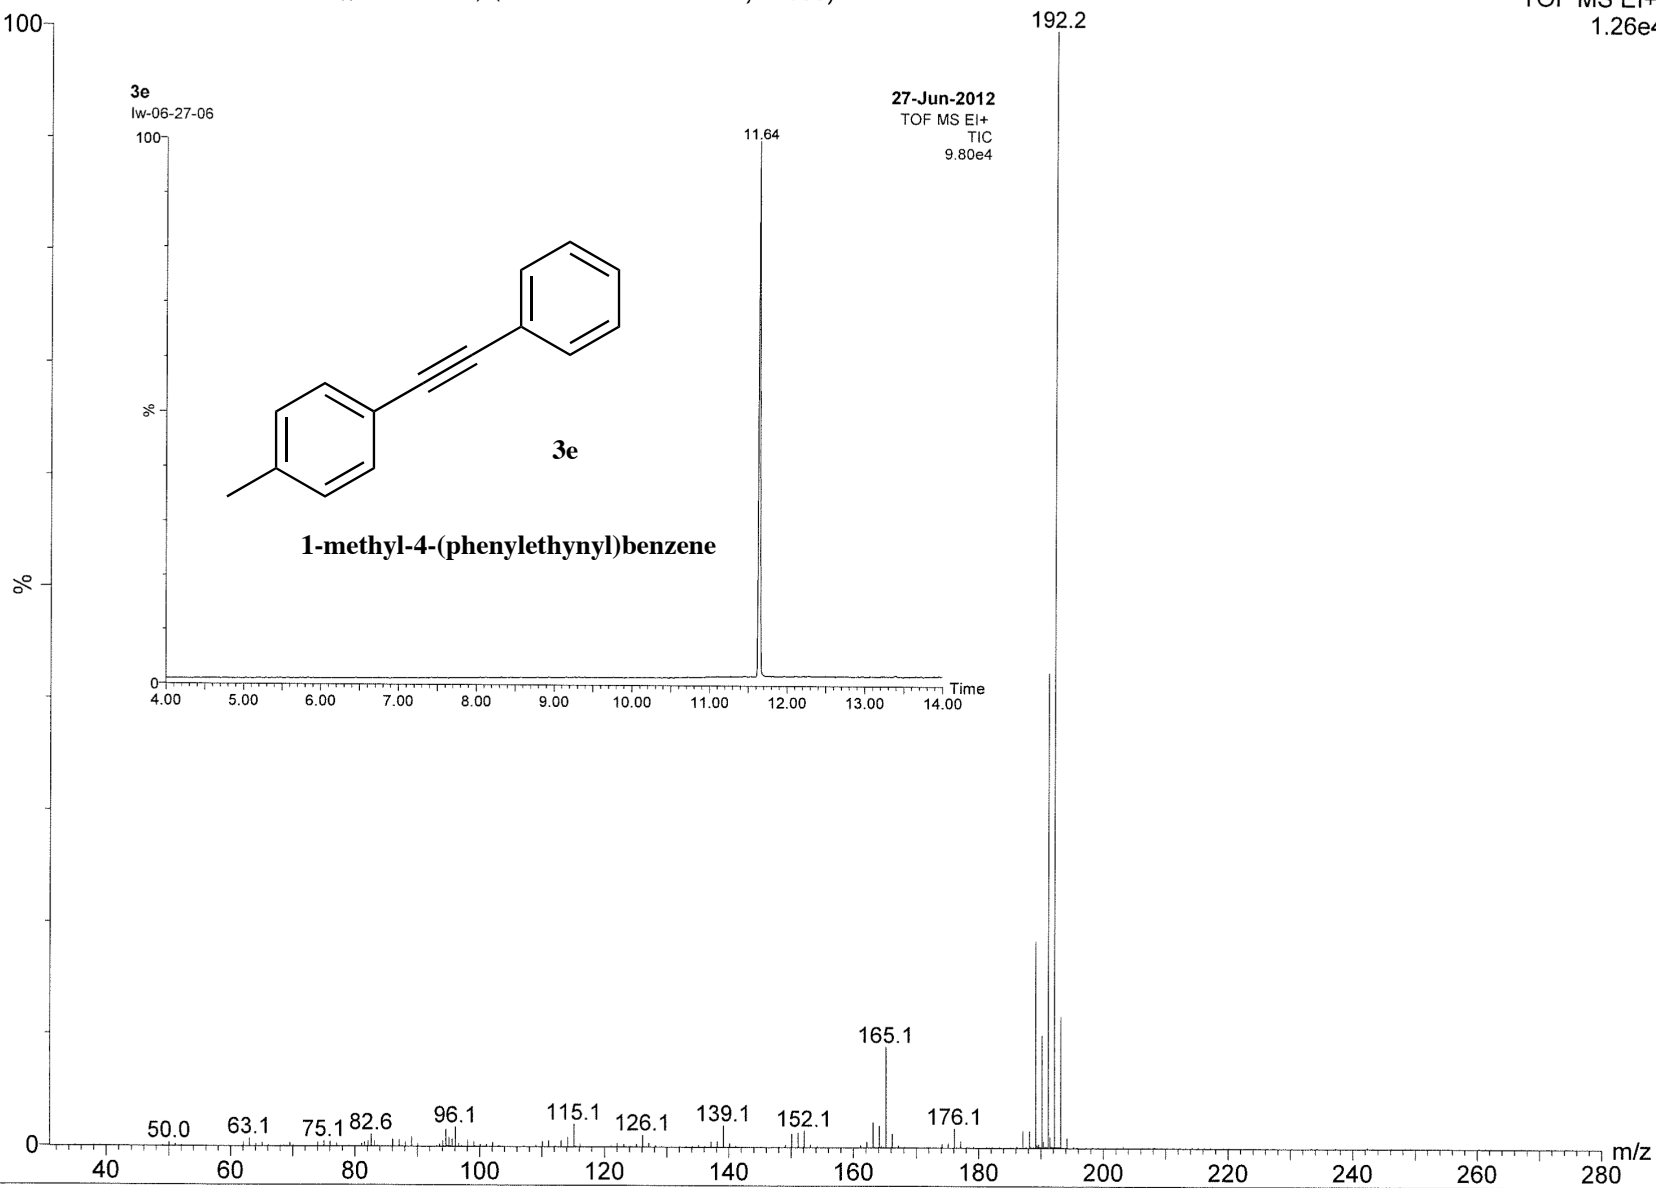

7.331  
7.311  
7.270  
7.118  
7.097

6.199

2.346  
2.233  
2.142  
1.687  
1.672  
1.628  
1.613

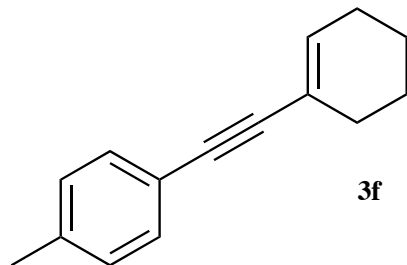

1-(cyclohex-1-en-1-ylethynyl)-4-methylbenzene

$^1\text{H}$  NMR (400 MHz,  $\text{CDCl}_3$ )  $\delta$  (ppm): 7.32 (d,  $J = 8.0$  Hz, 2H), 7.01 (d,  $J = 8.0$  Hz, 2H), 6.23–6.18 (m, 1H), 2.34 (s, 3H), 2.26–2.20 (m, 2H), 2.18–2.10 (m, 2H), 1.70–1.56 (m, 4H)

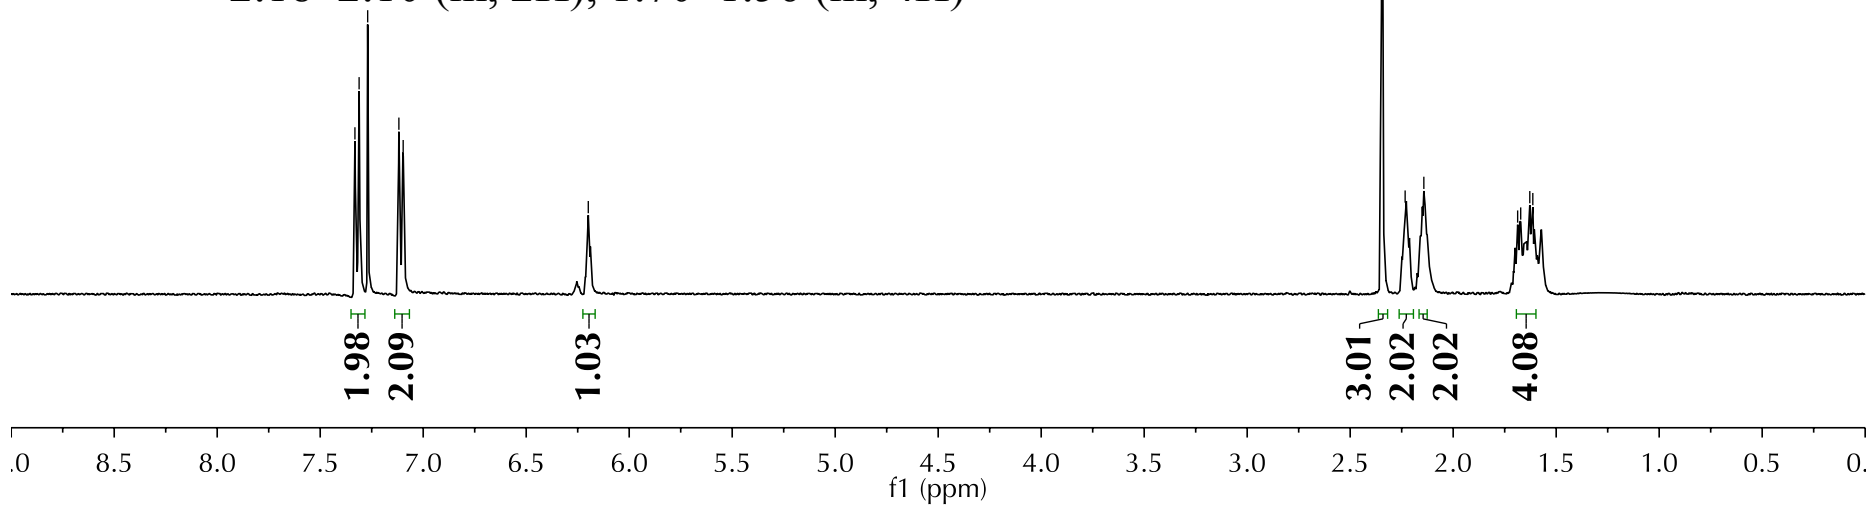

3f

lw-06-22-06 1202 (11.818) Cm (1201:1203-(1182:1196+1206:1218)x1.050)

22-Jun-2012

TOF MS EI+  
295

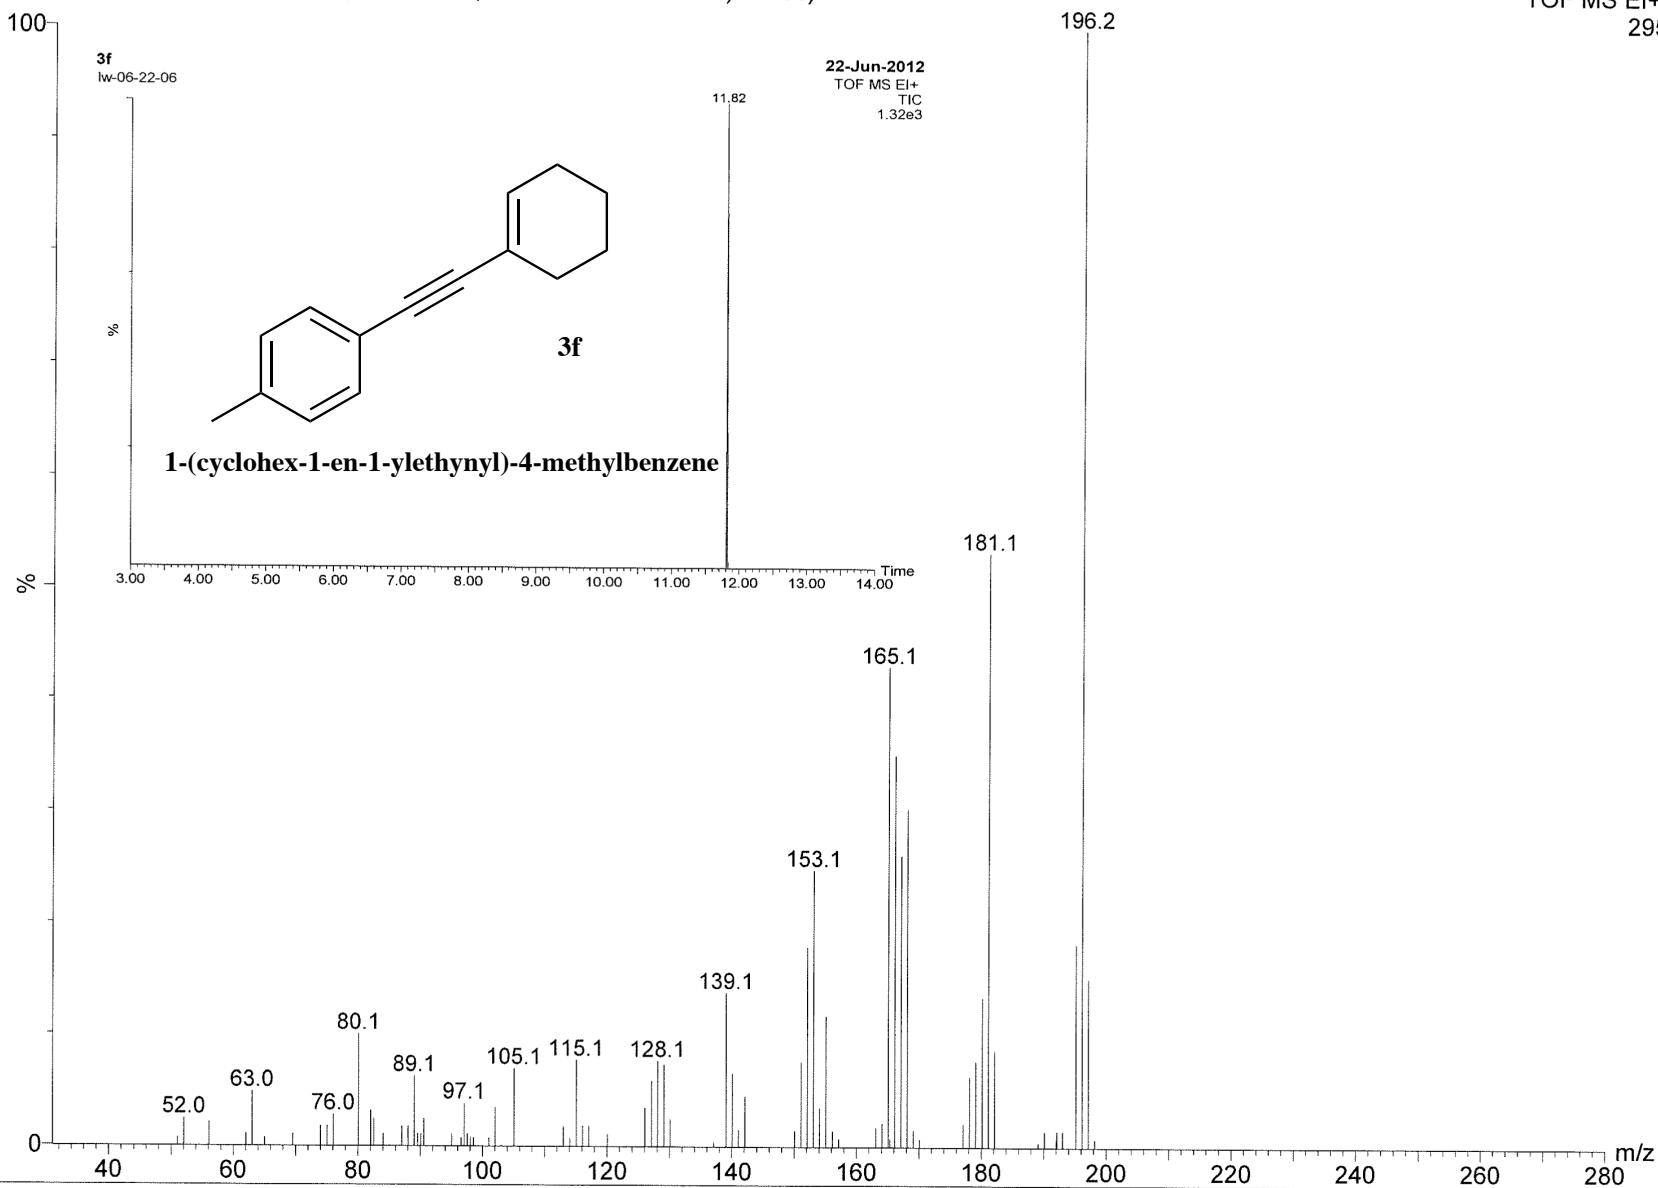

7.890  
7.876  
7.477  
7.464  
7.271

2.597  
2.452  
2.438  
2.427

1.625  
1.571  
1.464  
1.340  
1.264  
0.917

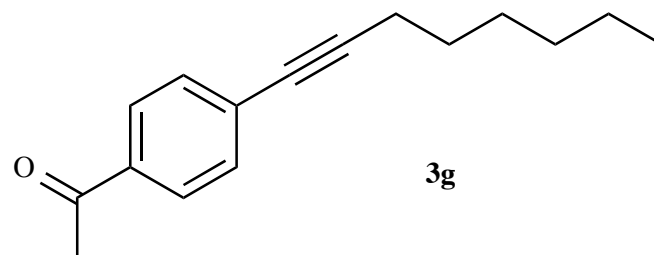

1-(4-(oct-1-yn-1-yl)phenyl)ethan-1-one

$^1\text{H}$  NMR (400 MHz,  $\text{CDCl}_3$ )  $\delta$  (ppm):  
7.87 (d,  $J = 8.4$  Hz, 2H), 7.46 (d,  $J = 8.4$  Hz, 2H), 2.60 (s, 3H), 2.44 (t,  $J = 7.2$  Hz, 2H), 1.65–1.59 (m, 4H), 1.50–1.44 (m, 2H), 1.38–1.31 (m, 4H), 0.90 (t,  $J = 6.8$  Hz, 3H)

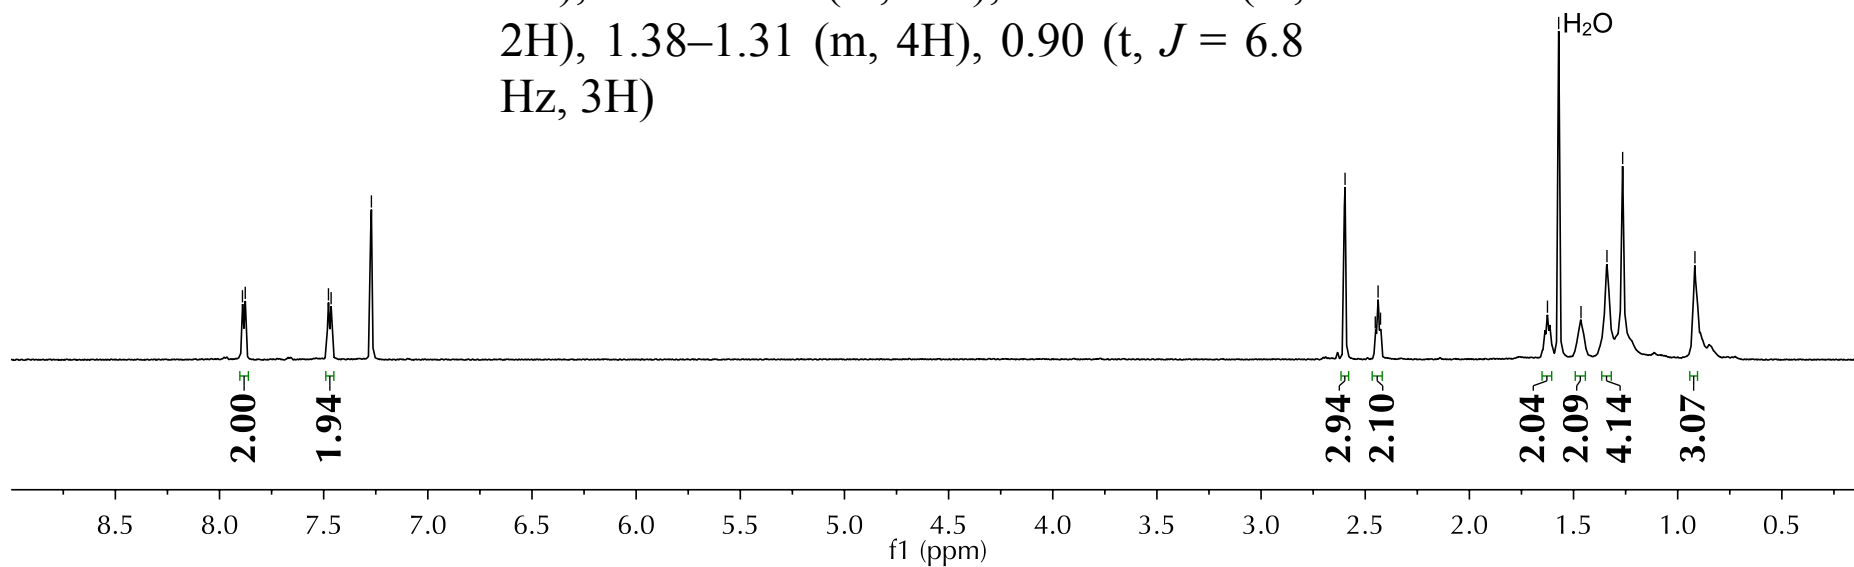

3g

lw-06-21-03 1322 (12.817) Cm ((1322+1325)-(1320+1326:1327)x1.050)

21-Jun-2012

TOF MS EI+

8.56e3

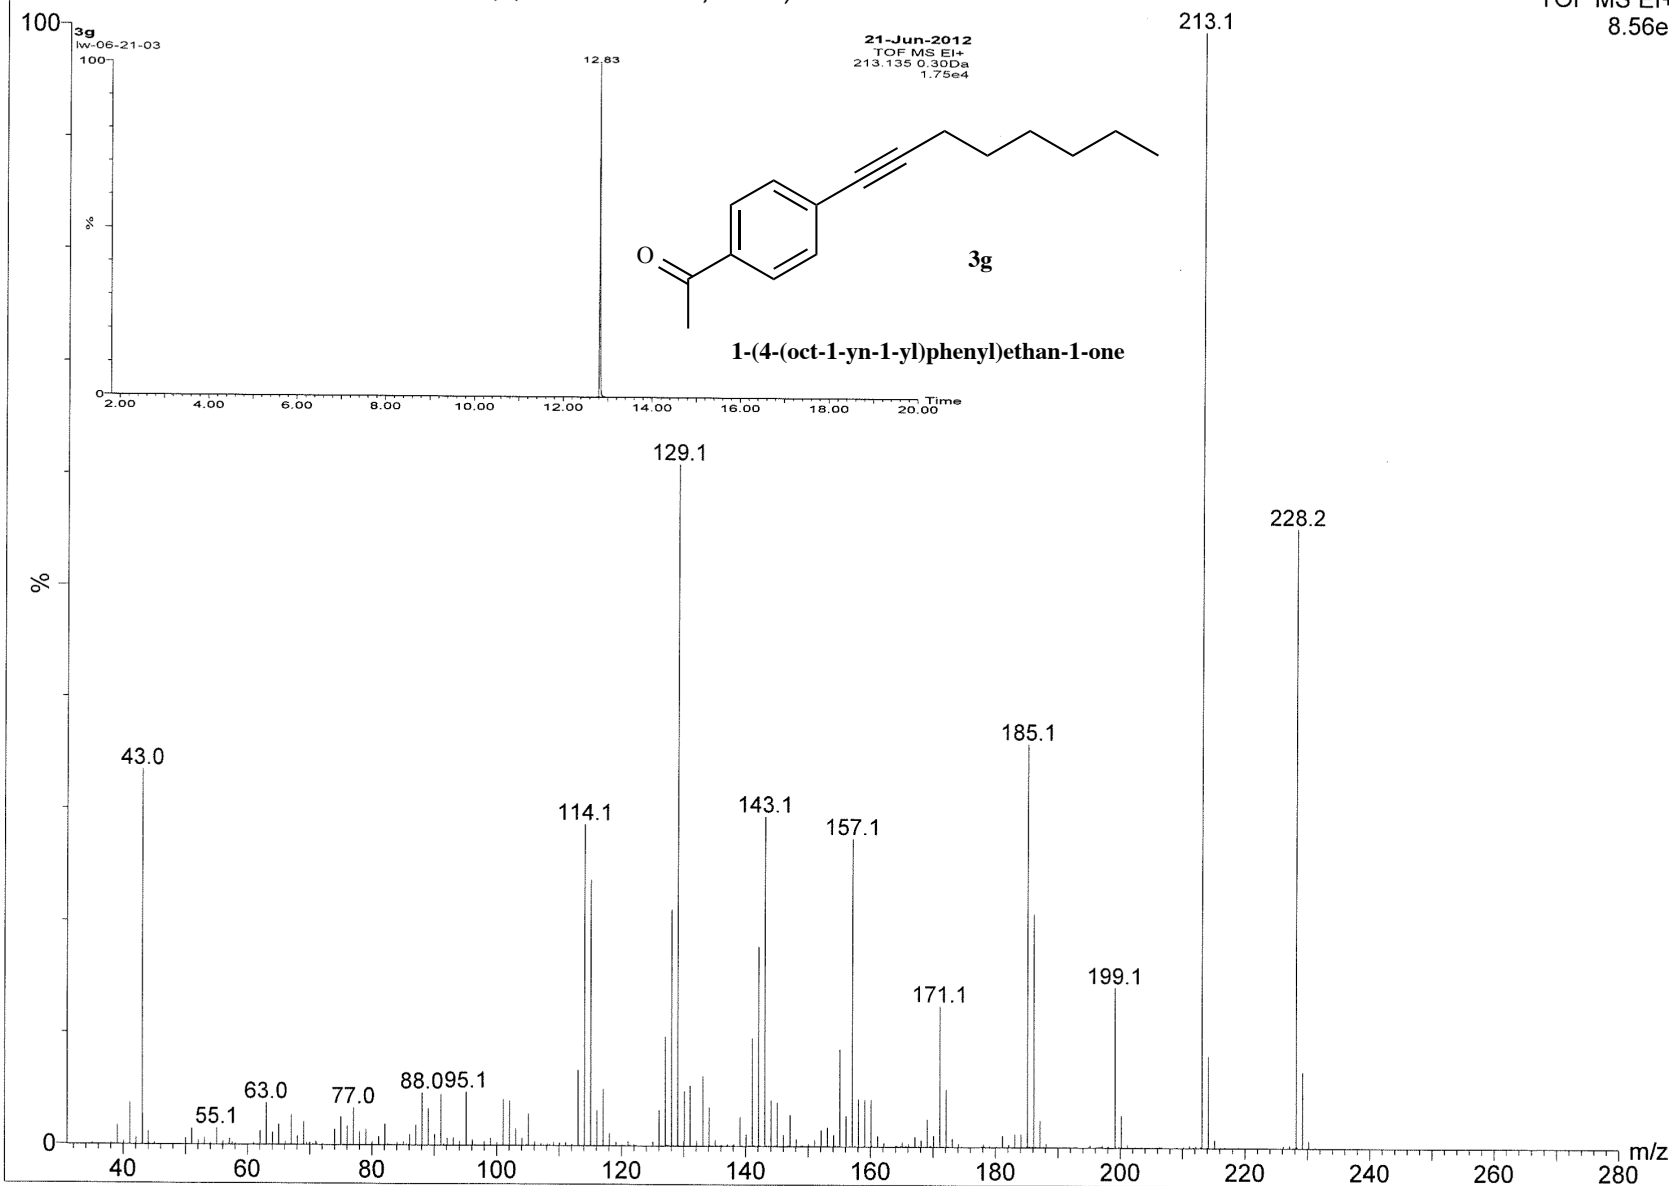

7.965  
7.944  
7.634  
7.612  
7.576  
7.569  
7.559  
7.552  
7.391  
7.382  
7.374  
7.270

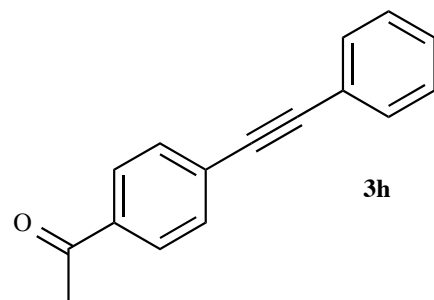

1-(4-(phenylethynyl)phenyl)ethan-1-one

$^1\text{H}$  NMR (400 MHz,  $\text{CDCl}_3$ )  $\delta$  (ppm):  
7.95 (d,  $J = 8.4$  Hz, 2H), 7.62 (d,  $J = 8.4$  Hz, 2H), 7.59–7.54 (m, 2H), 7.40–7.36 (m, 3H), 2.63 (s, 3H)

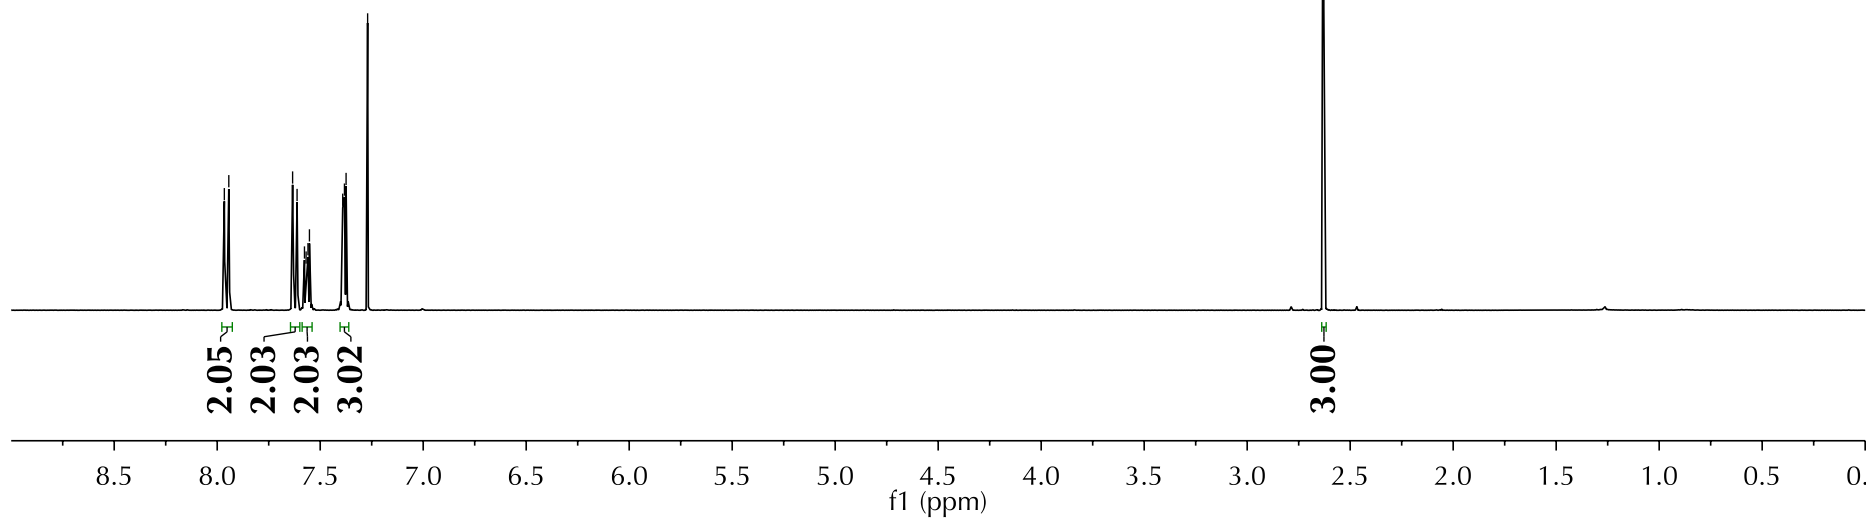

—2.629



**3h**

gmr-06-25-05 784 (8.527) Cm (784-779:781x1.050)

**25-Jun-2014**

TOF MS EI+  
1.26e3

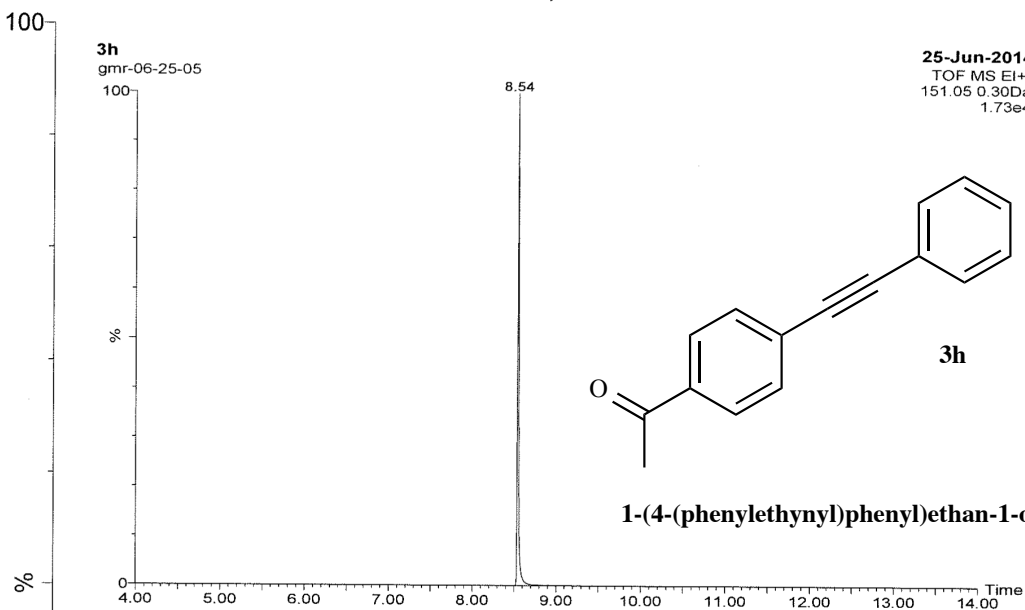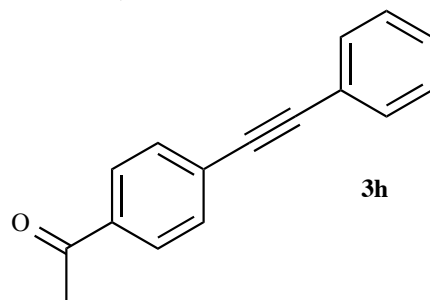

**1-(4-(phenylethynyl)phenyl)ethan-1-one**

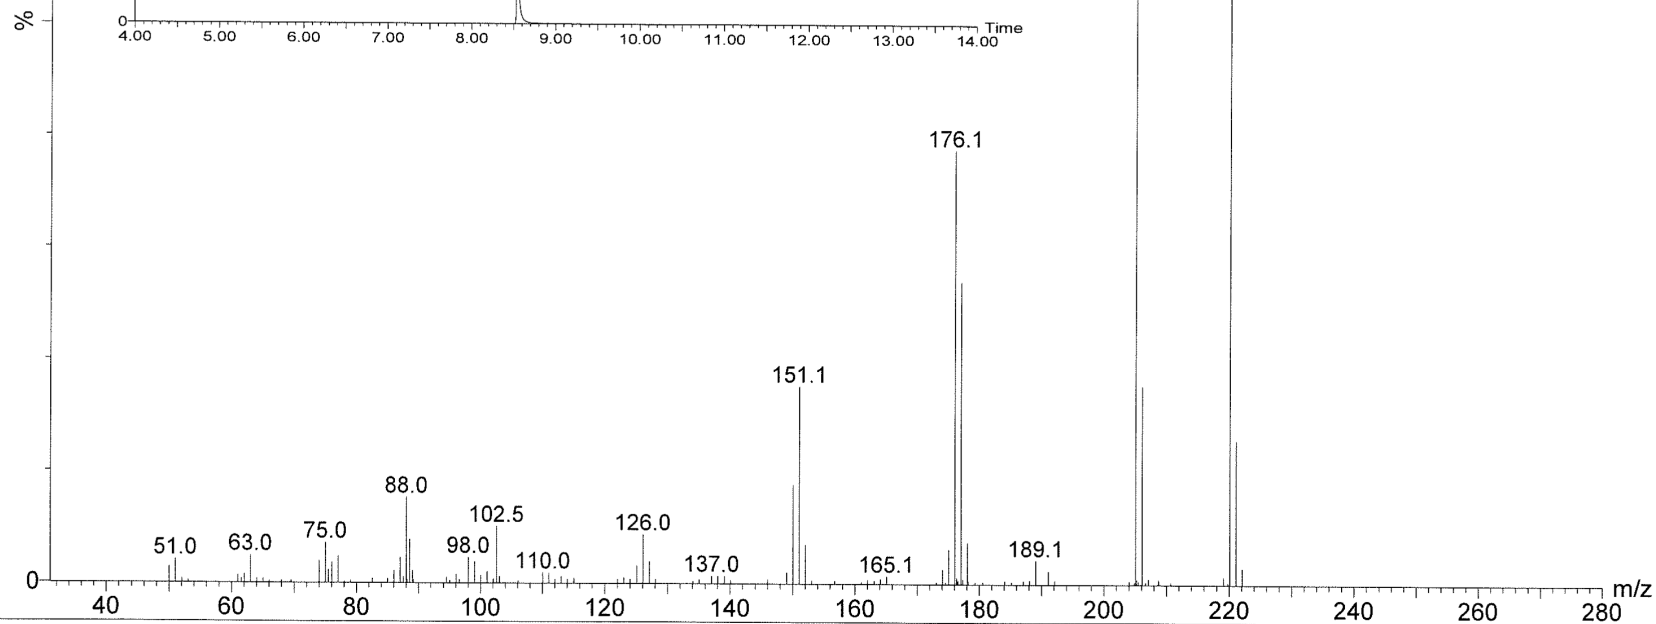

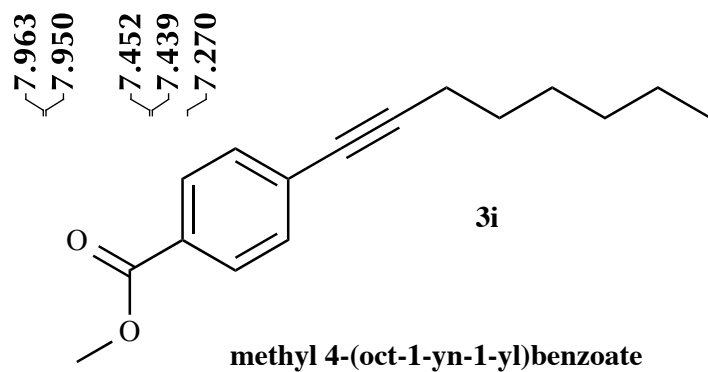

$^1\text{H}$  NMR (400 MHz,  $\text{CDCl}_3$ )  $\delta$  (ppm): 7.96 (d,  $J = 8.8$  Hz, 2H), 7.45 (d,  $J = 8.8$  Hz, 2H), 3.92 (s, 3H), 2.43 (t,  $J = 7.0$  Hz, 2H), 1.65–1.60 (m, 2H), 1.50–1.44 (m, 2H), 1.37–1.30 (m, 4H), 0.92 (t,  $J = 6.8$  Hz, 3H)

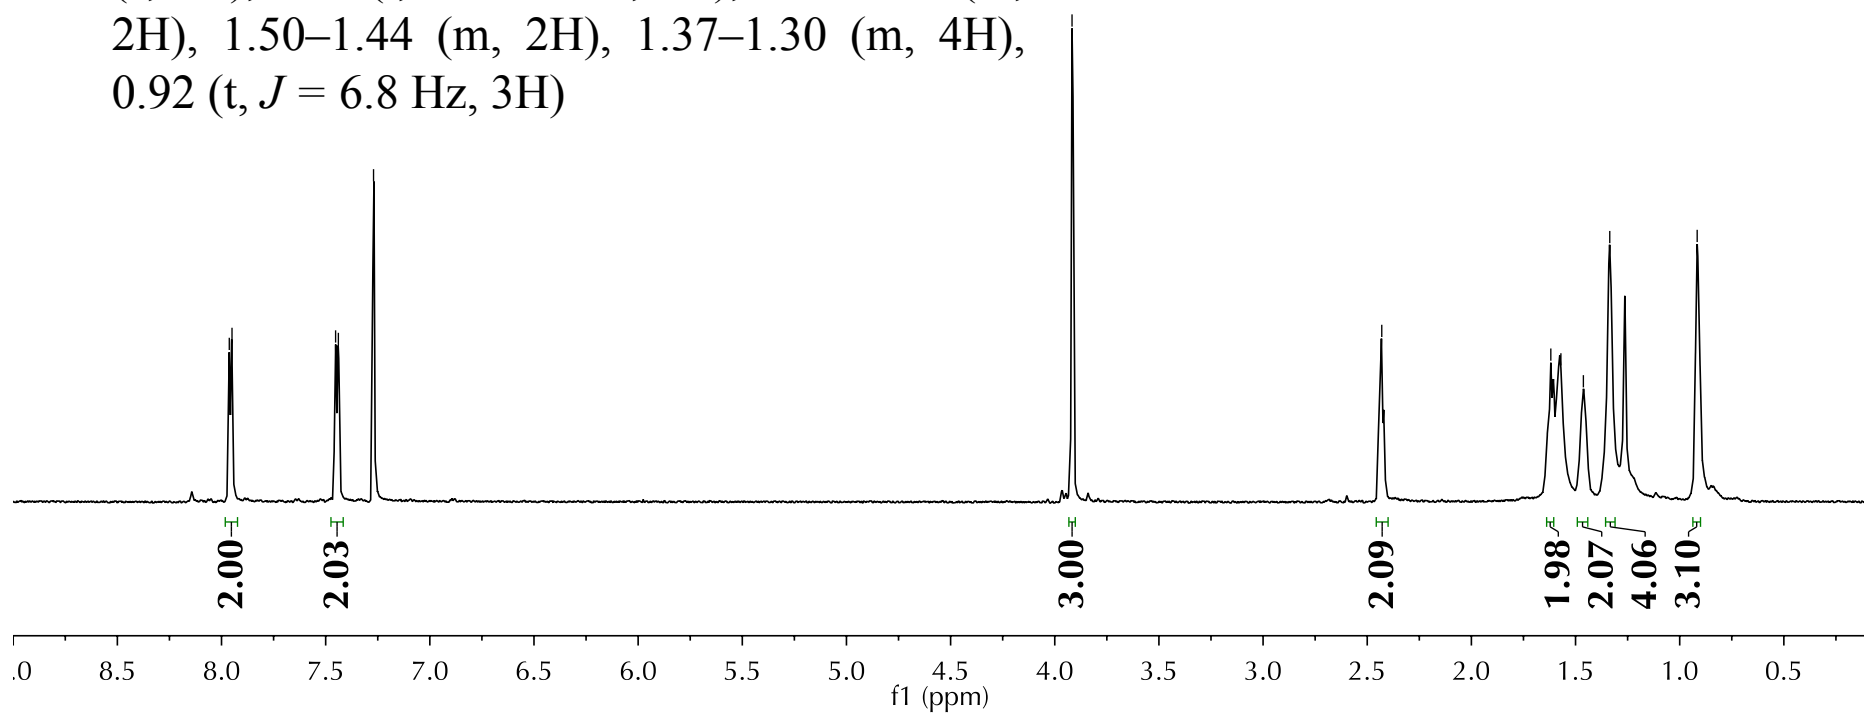

3i  
gmr-06-25-06 726 (8.050) Cm ((723+726)-(722+728:729)x1.050)

25-Jun-2014  
TOF MS EI+  
1.81e3

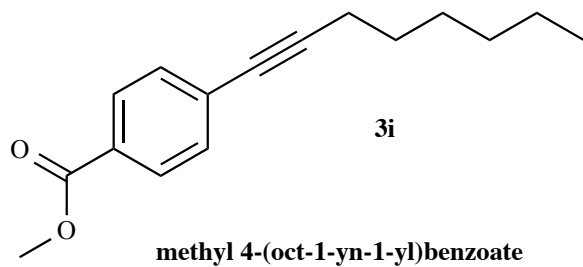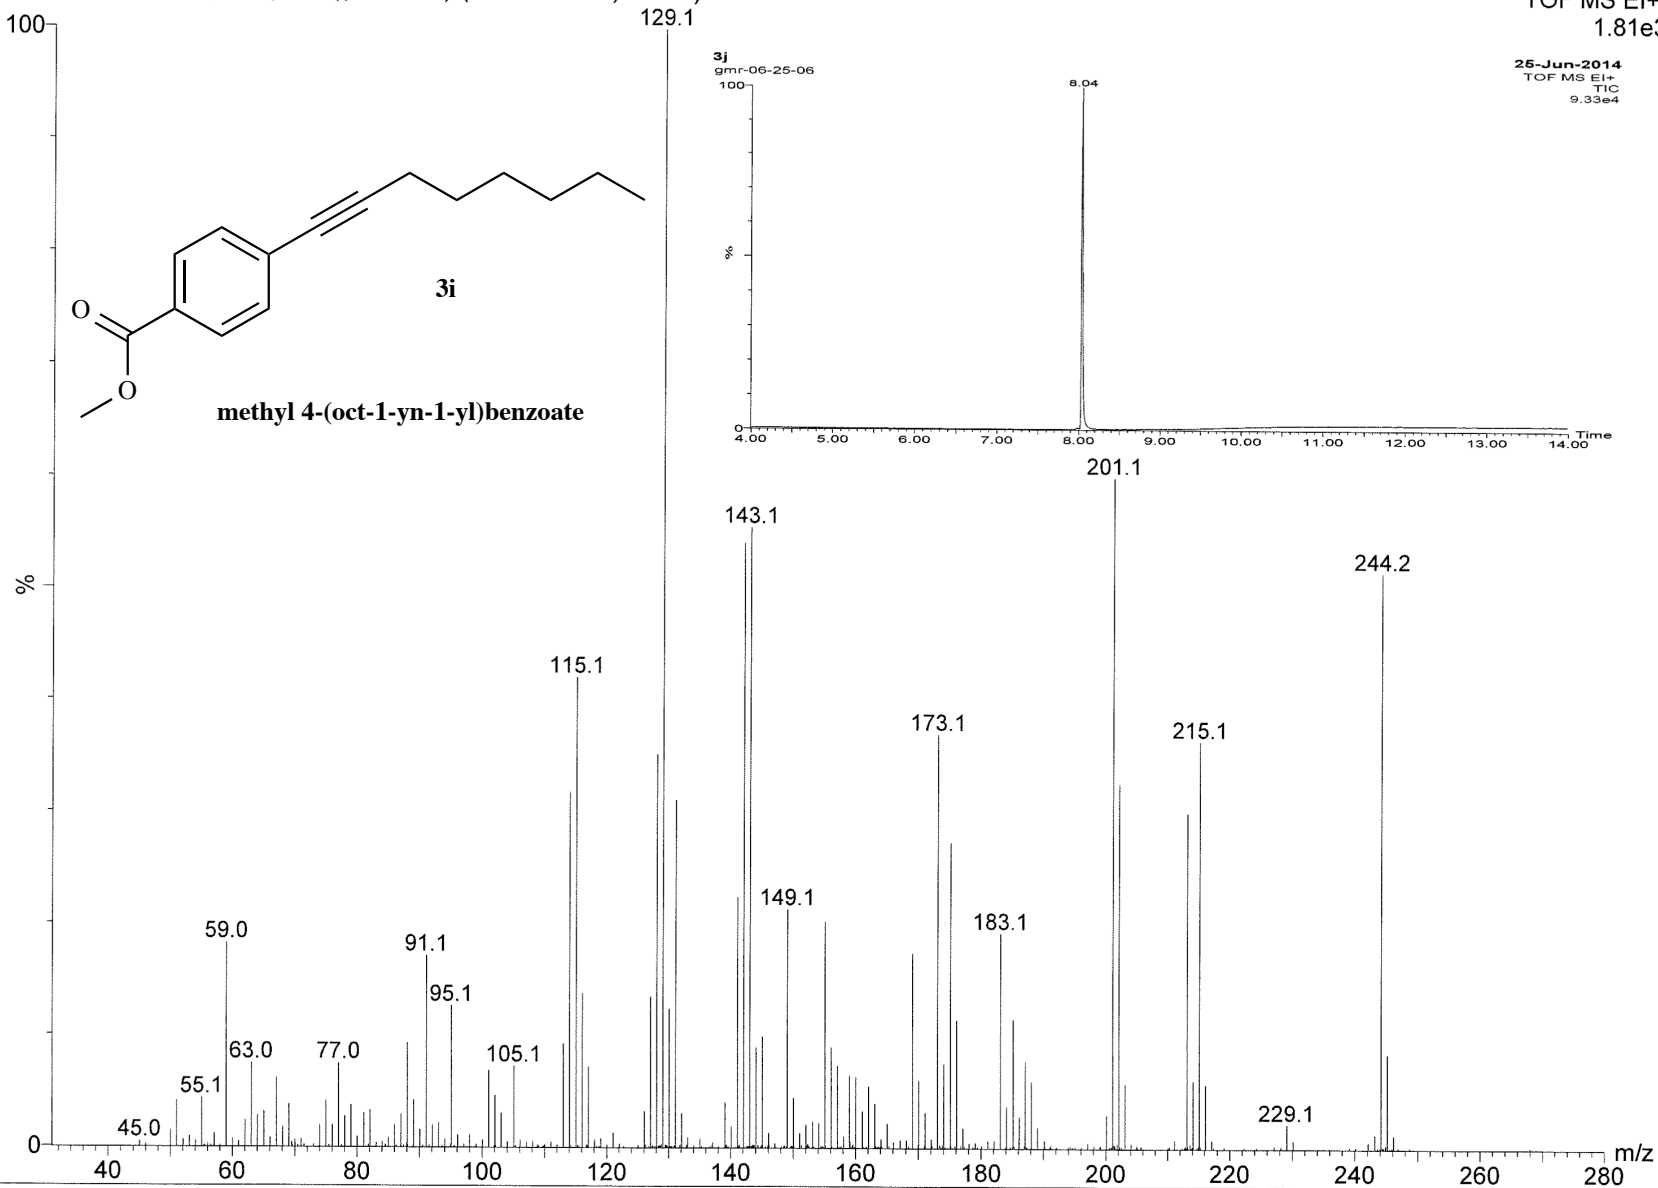

8.045  
8.023  
7.612  
7.590  
7.571  
7.558  
7.547  
7.386  
7.378  
7.370  
7.270

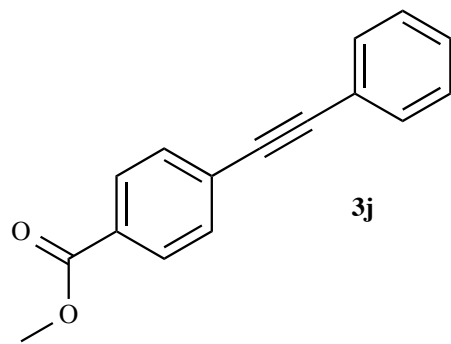

methyl 4-(phenylethynyl)benzoate

$^1\text{H}$  NMR (400 MHz,  $\text{CDCl}_3$ )  $\delta$  (ppm):  
8.03 (d,  $J = 8.3$  Hz, 2H), 7.60 (d,  $J = 8.3$  Hz, 2H), 7.57–7.54 (m, 2H), 7.39–7.36 (m 3H), 3.94 (s, 3H)

3.941

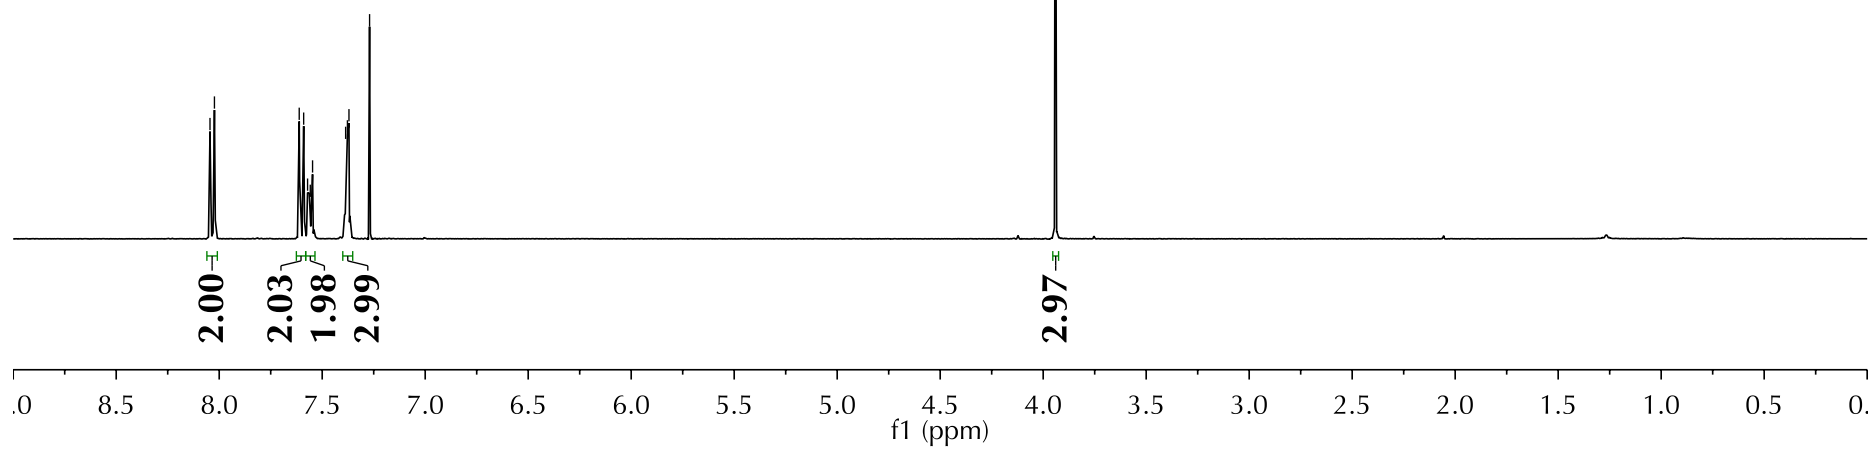

3j  
gmr-06-25-07 790 (8.584) Cm ((790+795)-(785:787+801:803)x1.050)

25-Jun-2014  
TOF MS EI+  
4.87e3

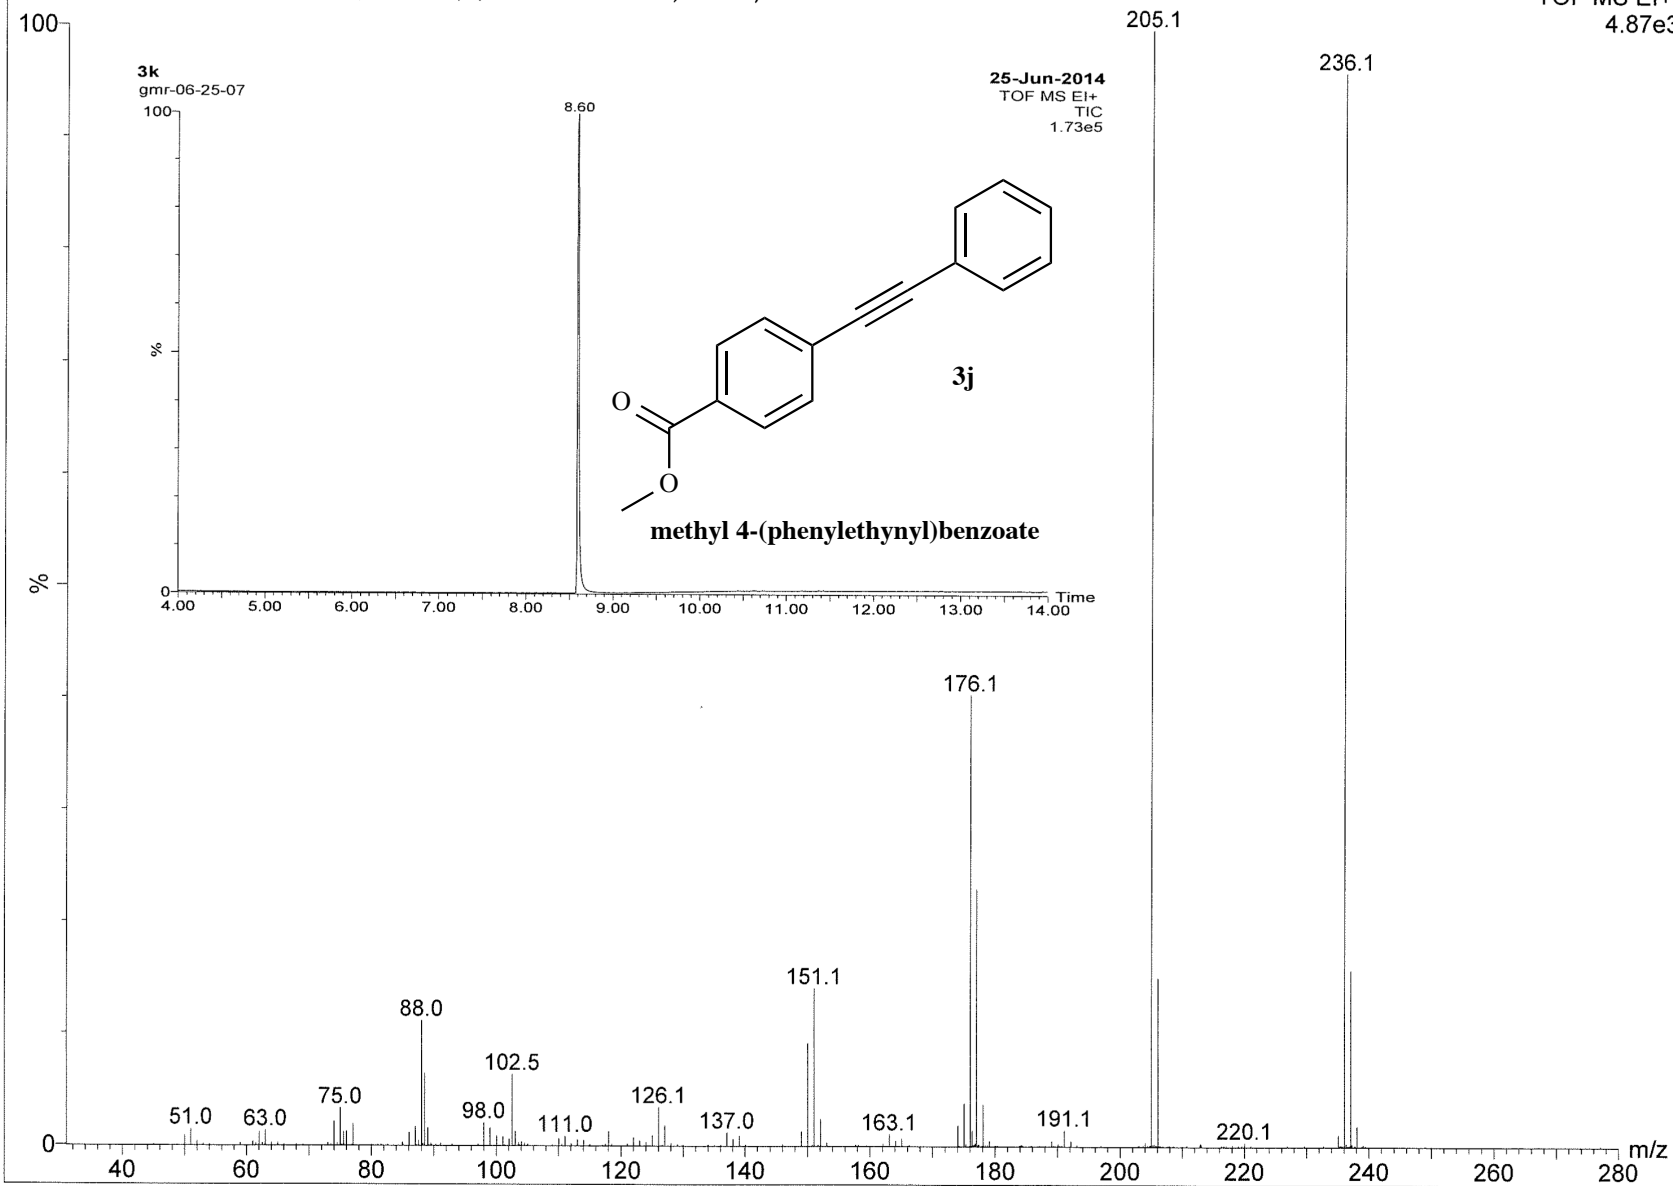

7.583  
7.562  
7.473  
7.452  
7.270

2.452  
2.434  
2.417  
1.653  
1.635  
1.617  
1.580  
1.489  
1.471  
1.465  
1.434  
1.337  
1.328  
1.318  
0.930  
0.914  
0.896

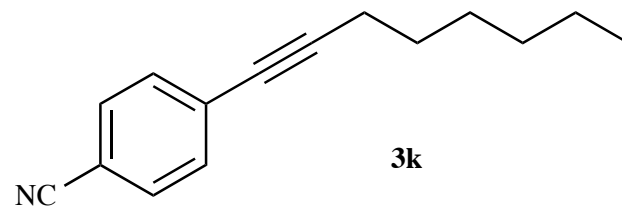

**4-(oct-1-yn-1-yl)benzonitrile**

<sup>1</sup>H NMR (400 MHz, CDCl<sub>3</sub>) δ (ppm):  
7.57 (d, *J* = 8.0 Hz, 2H), 7.46 (d, *J* =  
8.0 Hz, 2H), 2.43 (t, *J* = 7.2 Hz, 2H),  
1.66–1.57 (m, 2H), 1.50–1.41 (m,  
2H), 1.37–1.29 (m, 4H), 0.91 (t, *J* =  
6.6 Hz, 3H)

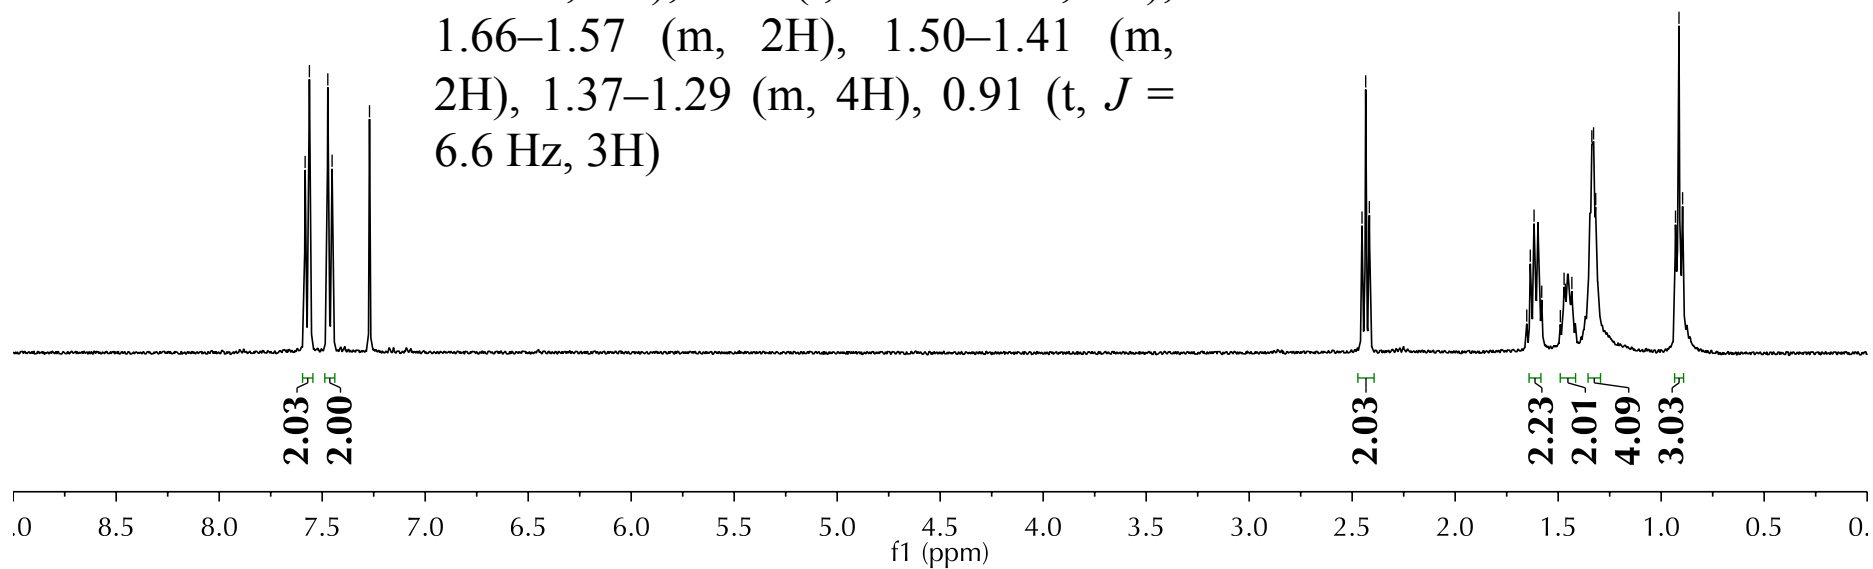

3k

lw-06-22-08 1232 (12.061) Cm ((1232+1236)-(1226:1229+1240:1245)x1.050)

22-Jun-2012

TOF MS EI+

5.94e3

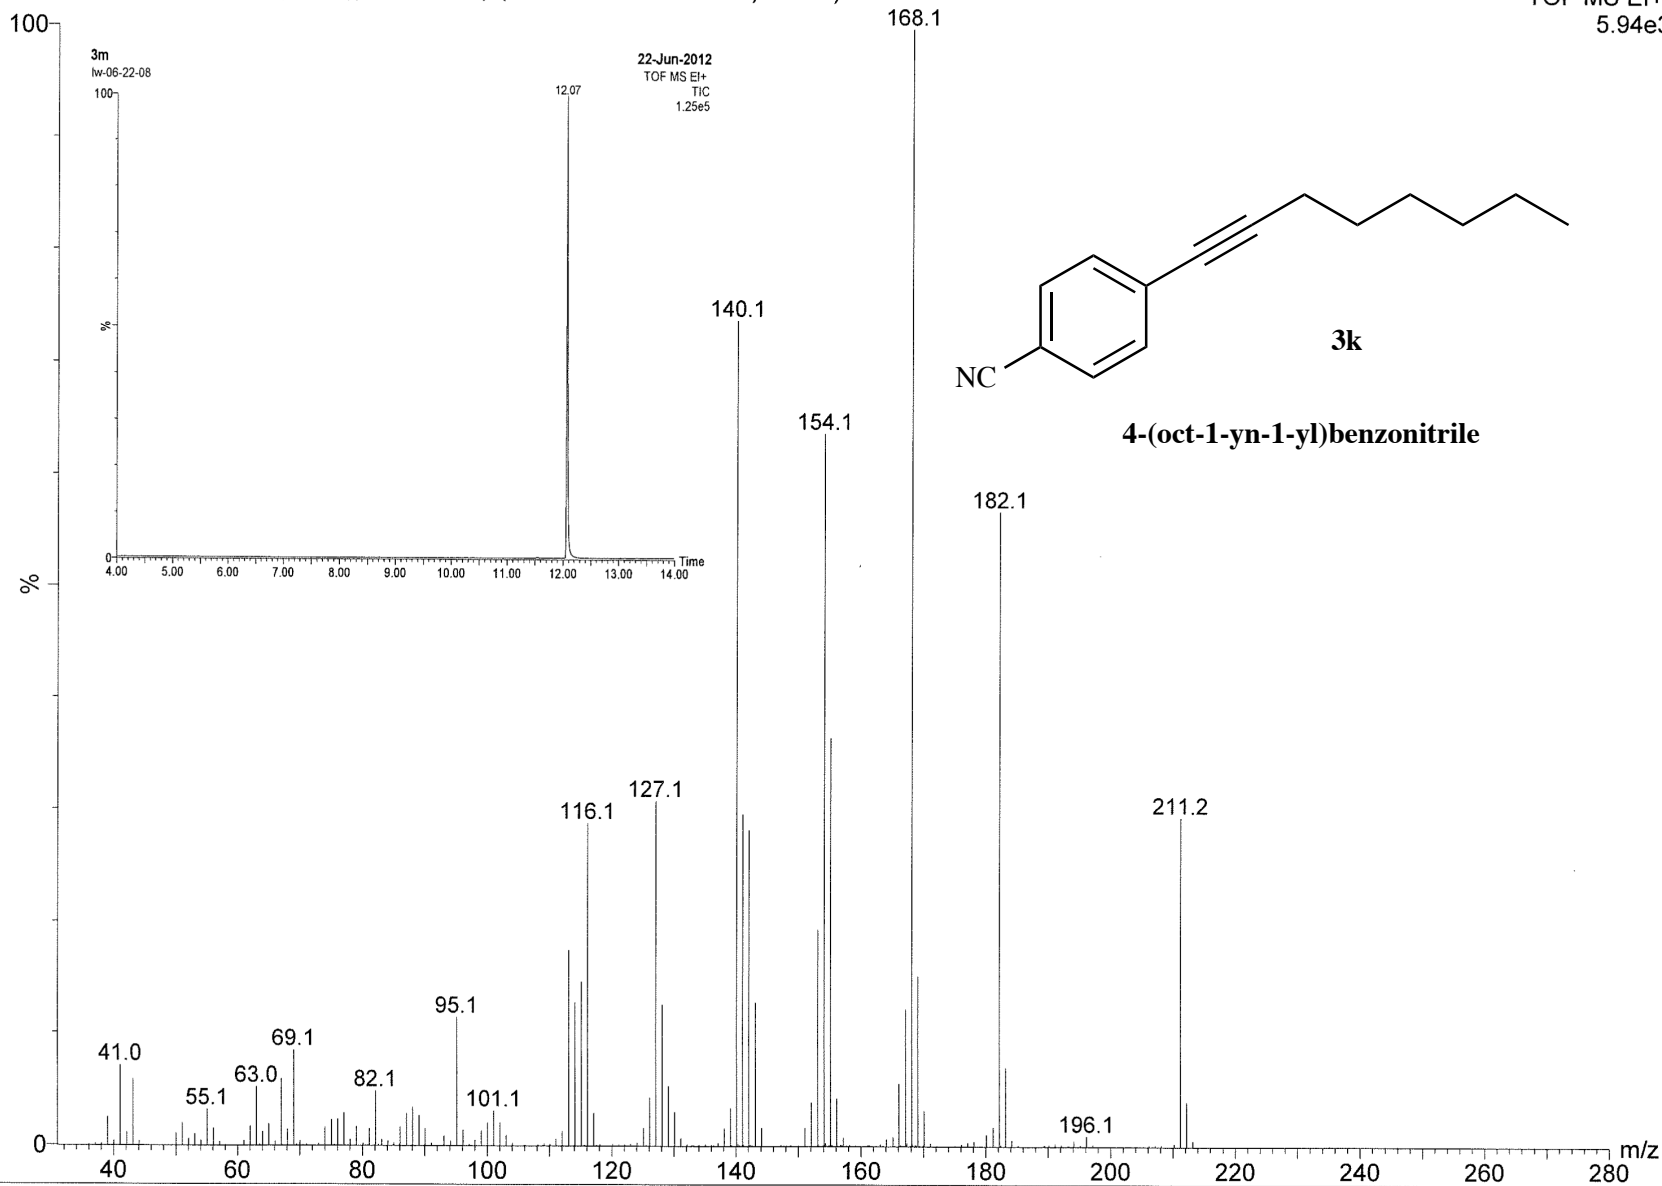

7.664  
7.643  
7.627  
7.607  
7.563  
7.555  
7.396  
7.388  
7.270

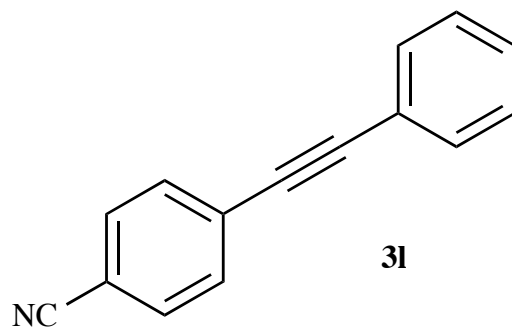

4-(phenylethynyl)benzonitrile

$^1\text{H}$  NMR (400 MHz,  $\text{CDCl}_3$ )  $\delta$  (ppm):  
7.70–7.59 (m, 4H), 7.59–7.52 (m, 2H),  
7.43–7.36 (m, 3H)

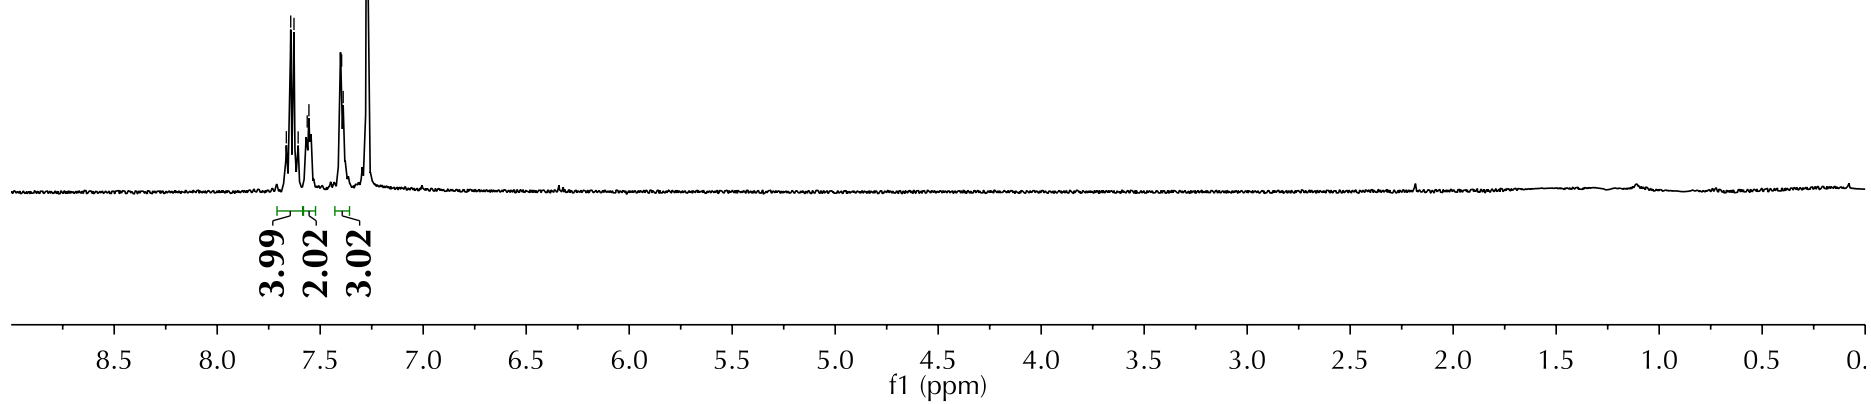



3l

gmr-06-25-08 729 (8.075) Cm ((729+736)-(725:726+740:741)x1.050)

25-Jun-2014

TOF MS EI+

3.18e3

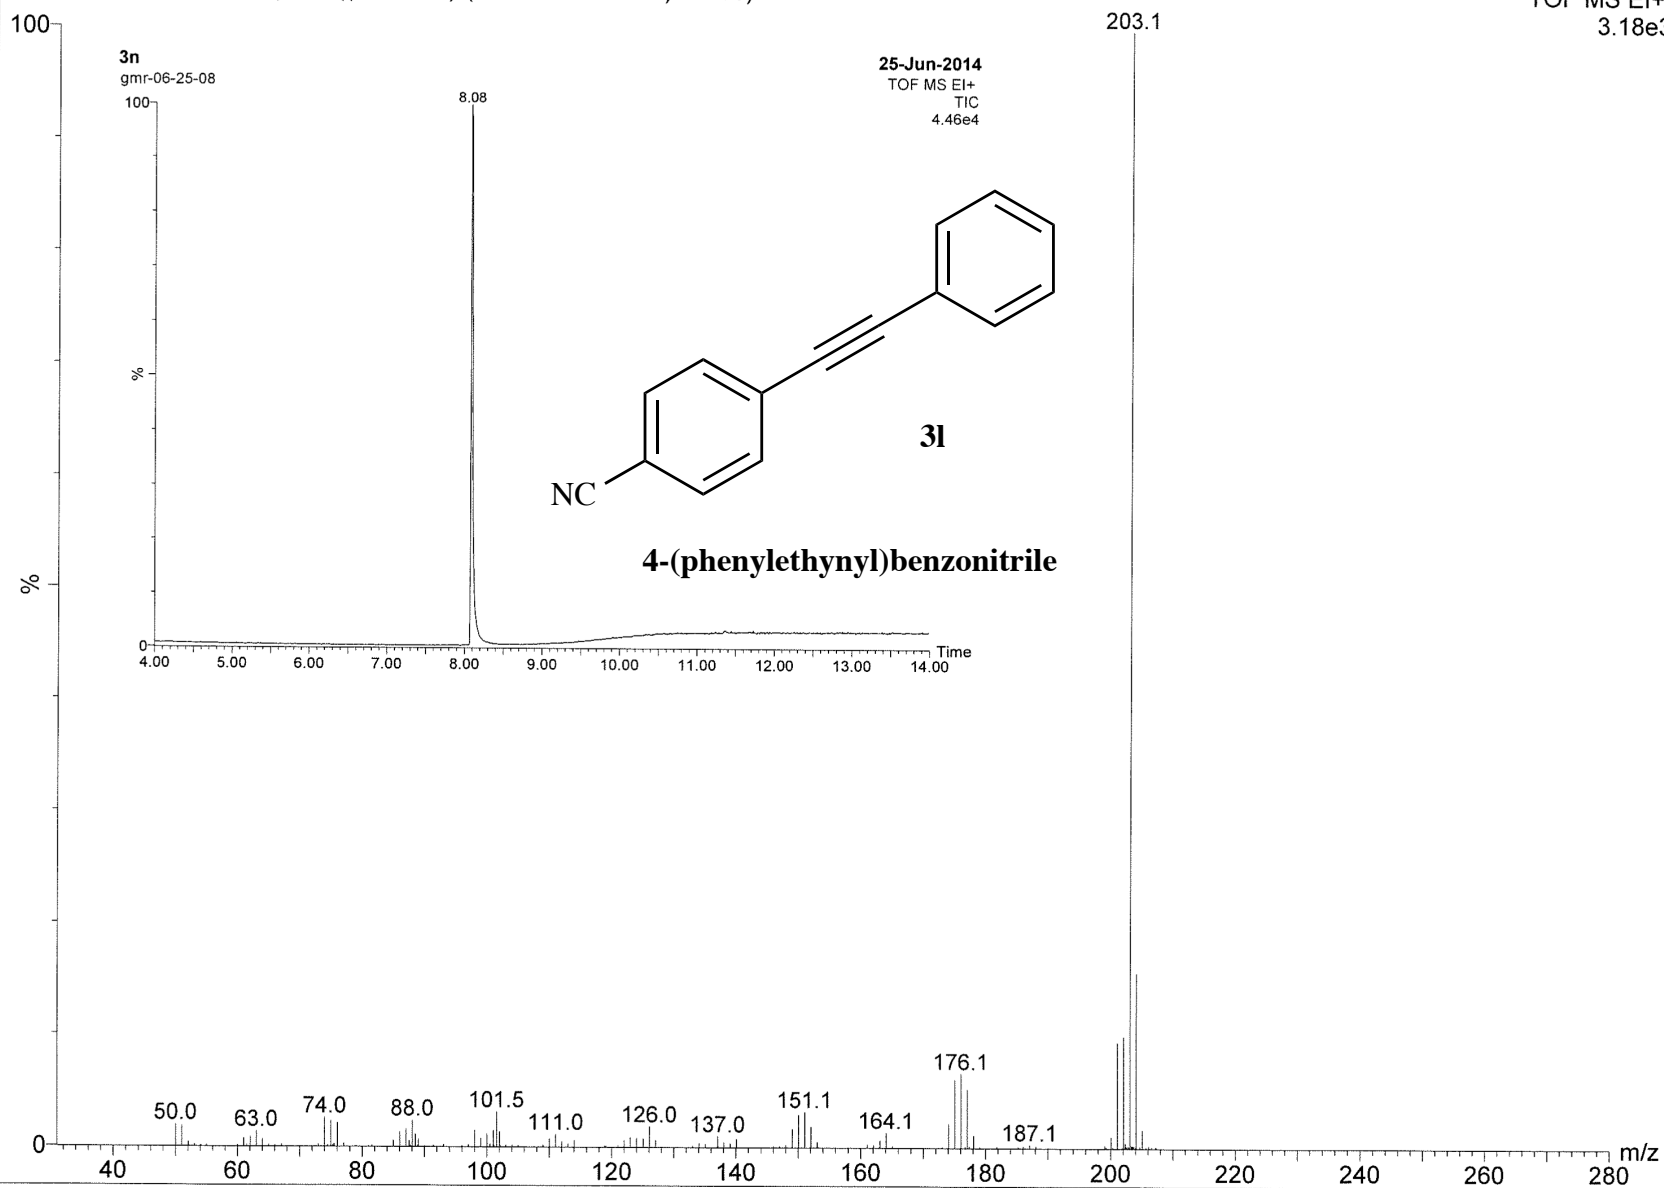

8.170  
8.148

7.531  
7.509  
7.270

2.471  
2.453  
2.435  
1.667  
1.650  
1.631  
1.612  
1.594  
1.487  
1.460  
1.444  
1.352  
1.343  
1.334  
1.325  
0.935  
0.917  
0.900

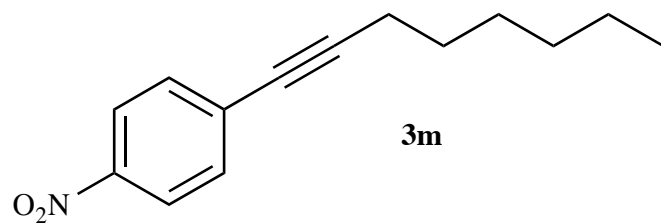

1-nitro-4-(oct-1-yn-1-yl)benzene

$^1\text{H}$  NMR (400 MHz,  $\text{CDCl}_3$ )  $\delta$  (ppm): 8.16 (d,  $J = 8.0$  Hz, 2H), 7.52 (d,  $J = 8.0$  Hz, 2H), 2.45 (t,  $J = 7.2$  Hz, 2H), 1.67–1.58 (m, 2H), 1.51–1.43 (m, 2H), 1.38–1.31 (m, 4H), 0.90 (t,  $J = 6.6$  Hz, 3H).

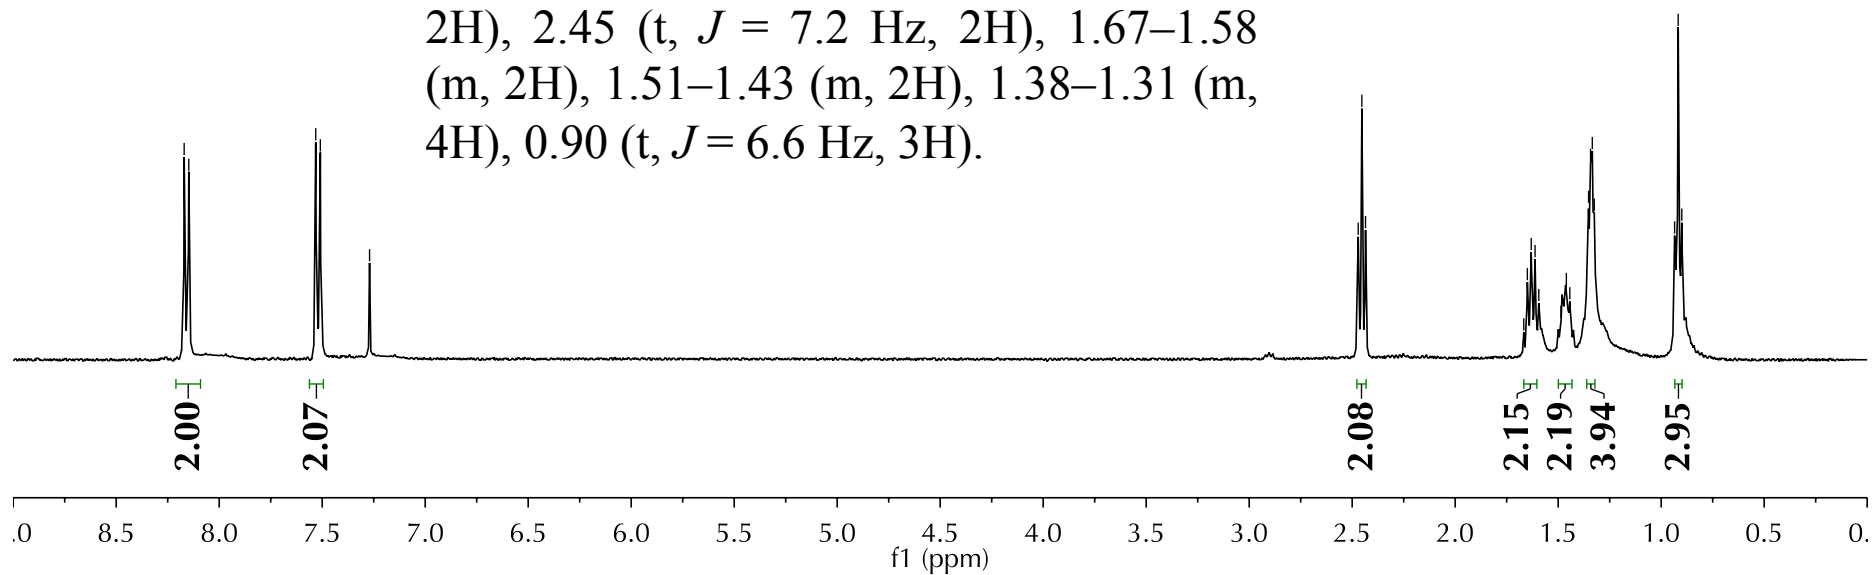

3m  
gmr-06-25-09 724 (8.033) Cm ((724+727)-715:720x1.050)

25-Jun-2014  
TOF MS EI+  
1.76e3

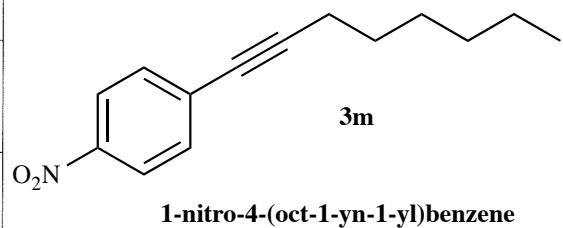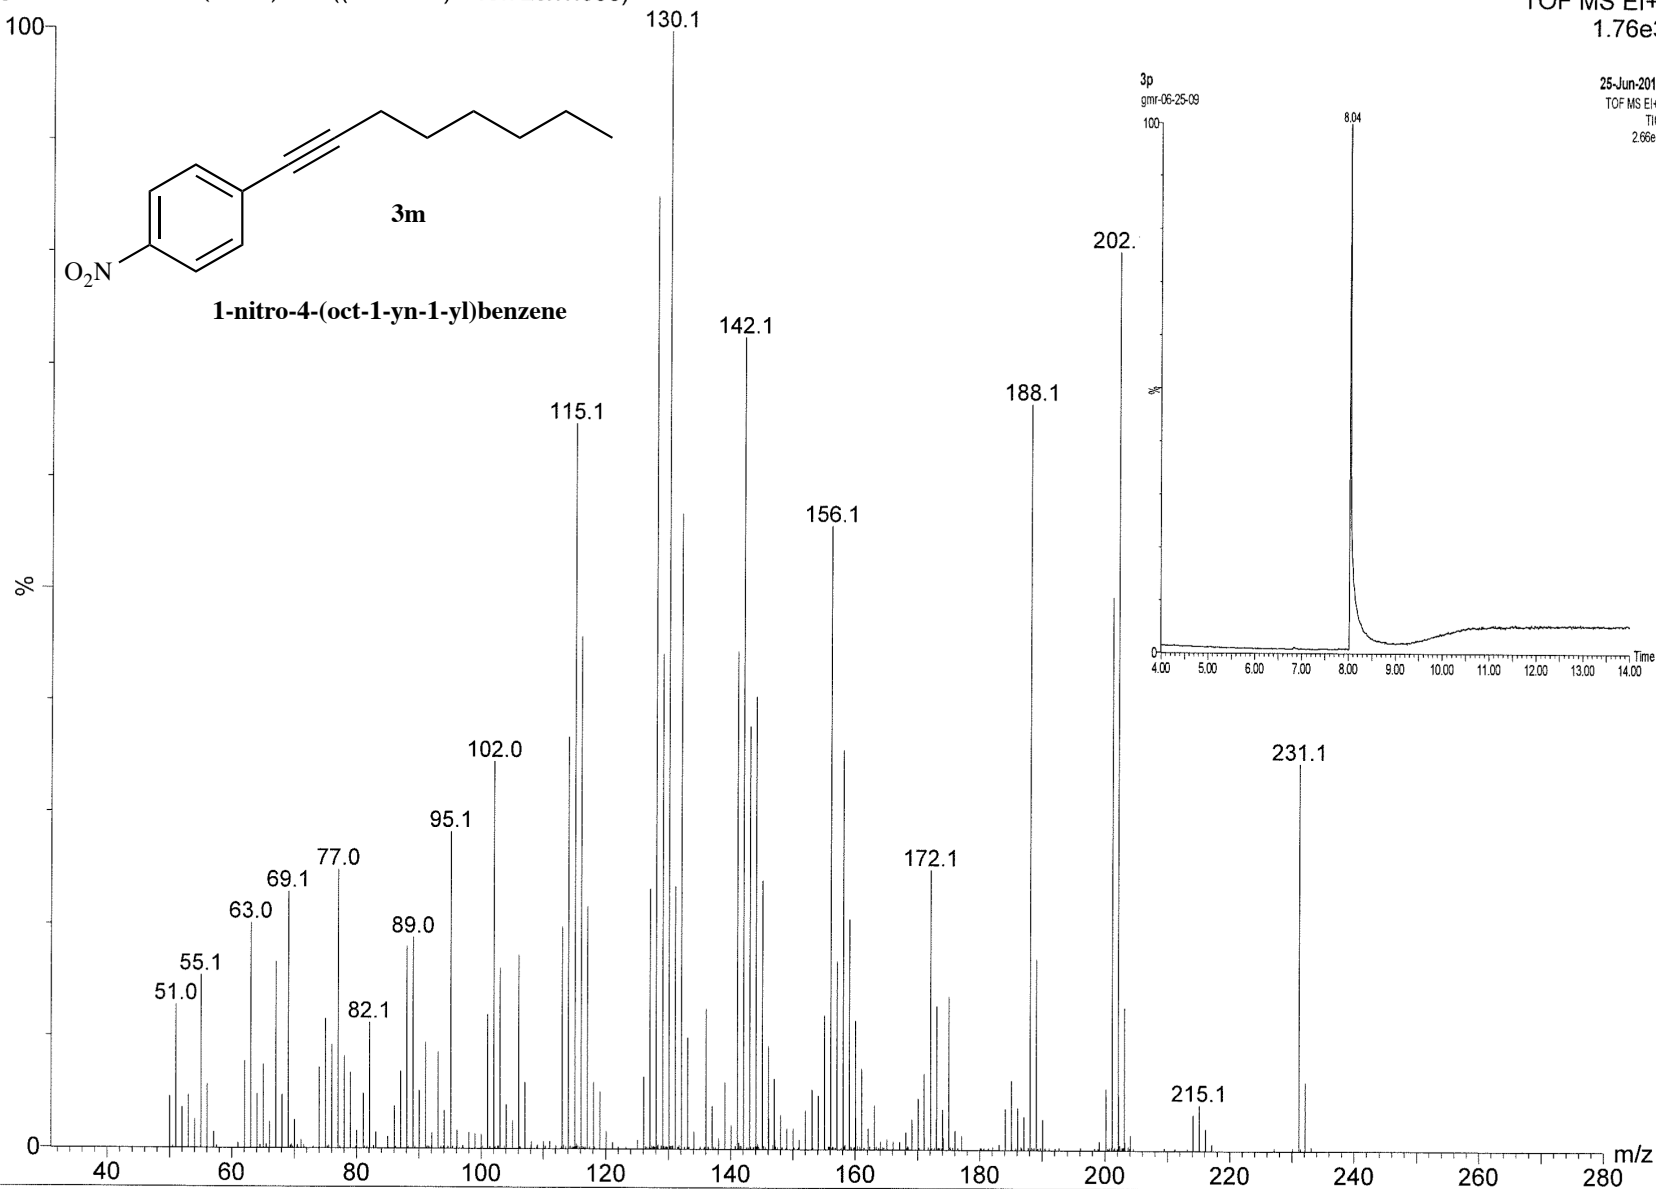

8.297  
8.274  
8.178  
8.155  
7.581  
7.557  
7.489  
7.468  
7.435  
7.270  
7.260

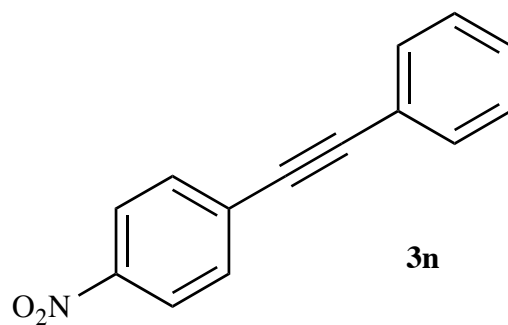

**1-nitro-4-(phenylethynyl)benzene**

$^1\text{H}$  NMR (400 MHz,  $\text{CDCl}_3$ )  $\delta$  (ppm):  
8.30 (d,  $J = 9.2$  Hz, 2H), 8.16 (d,  $J = 9.2$  Hz, 2H), 7.60–7.55 (m, 2H), 7.47–7.43 (m, 3H).

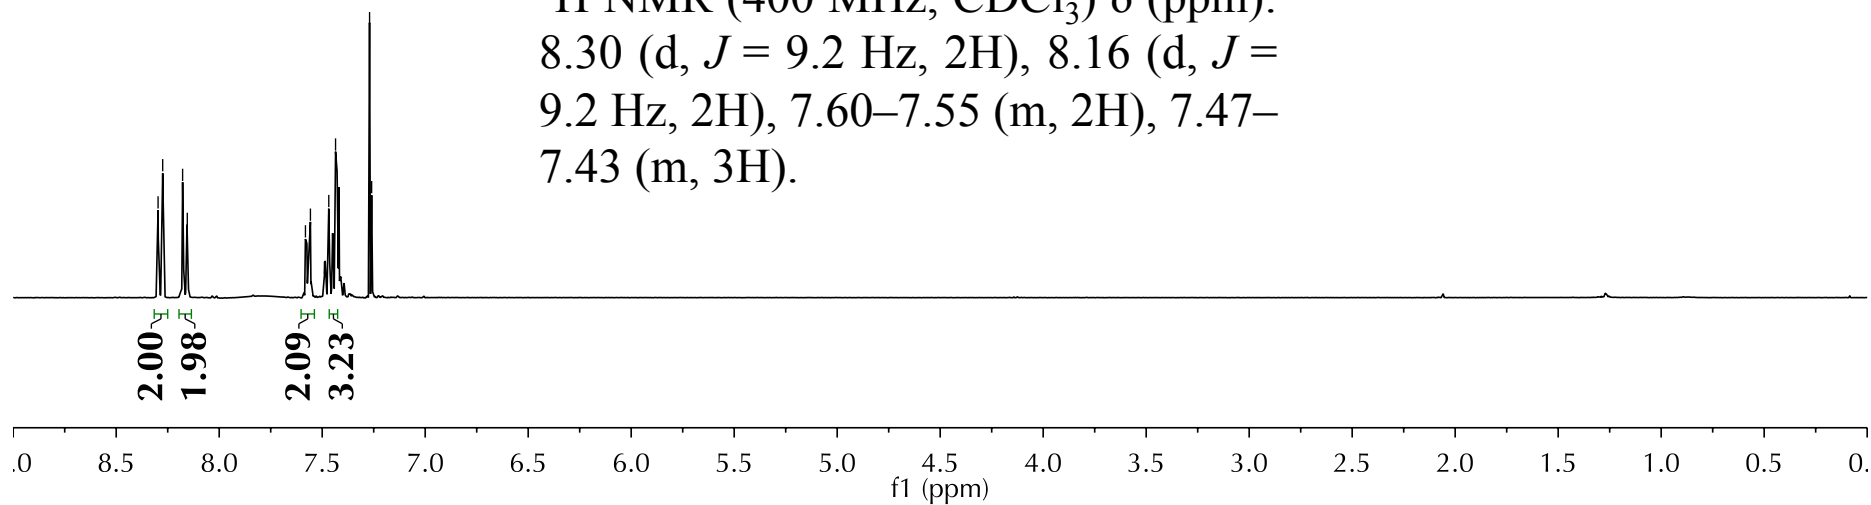

3n  
gmr-07-23-01 718 (7.984) Cm (715:724-(705:713+727:733)x1.050)

23-Jul-2014  
TOF MS EI+  
2.65e3

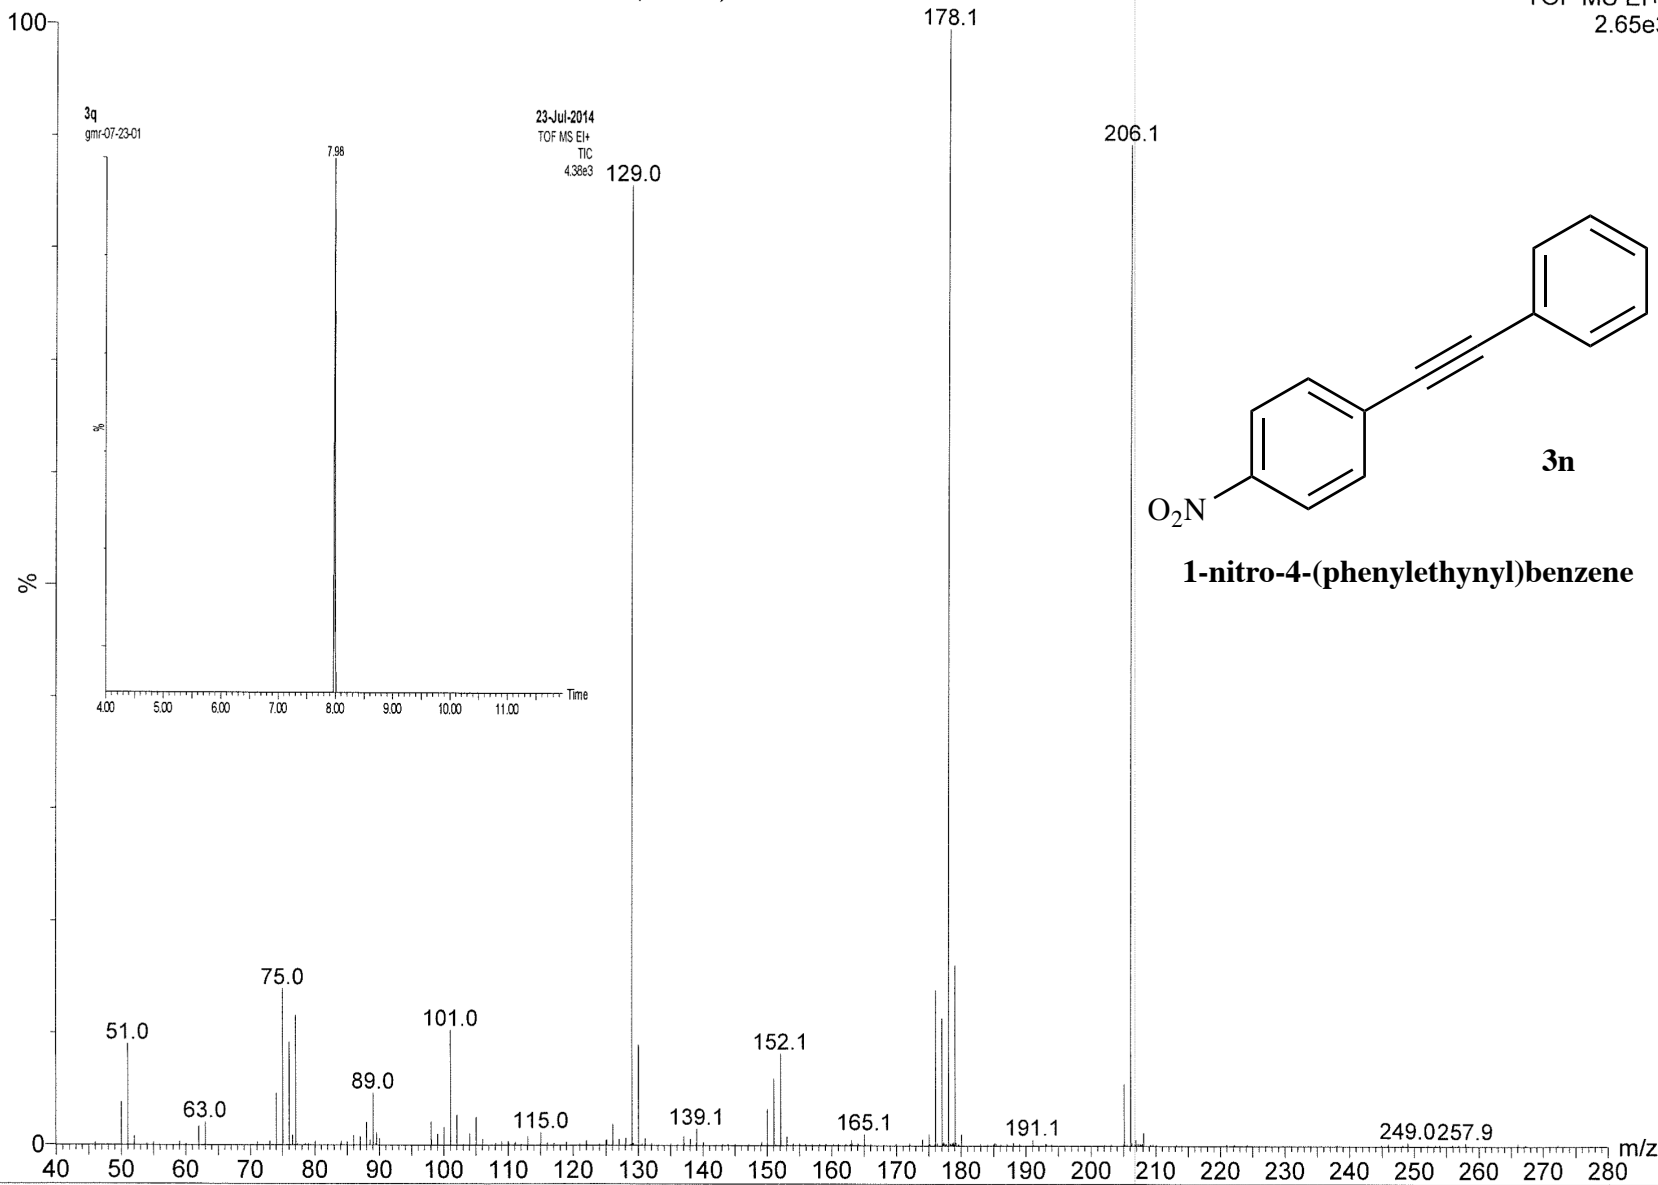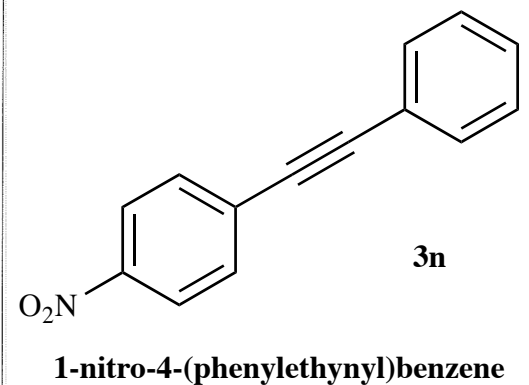

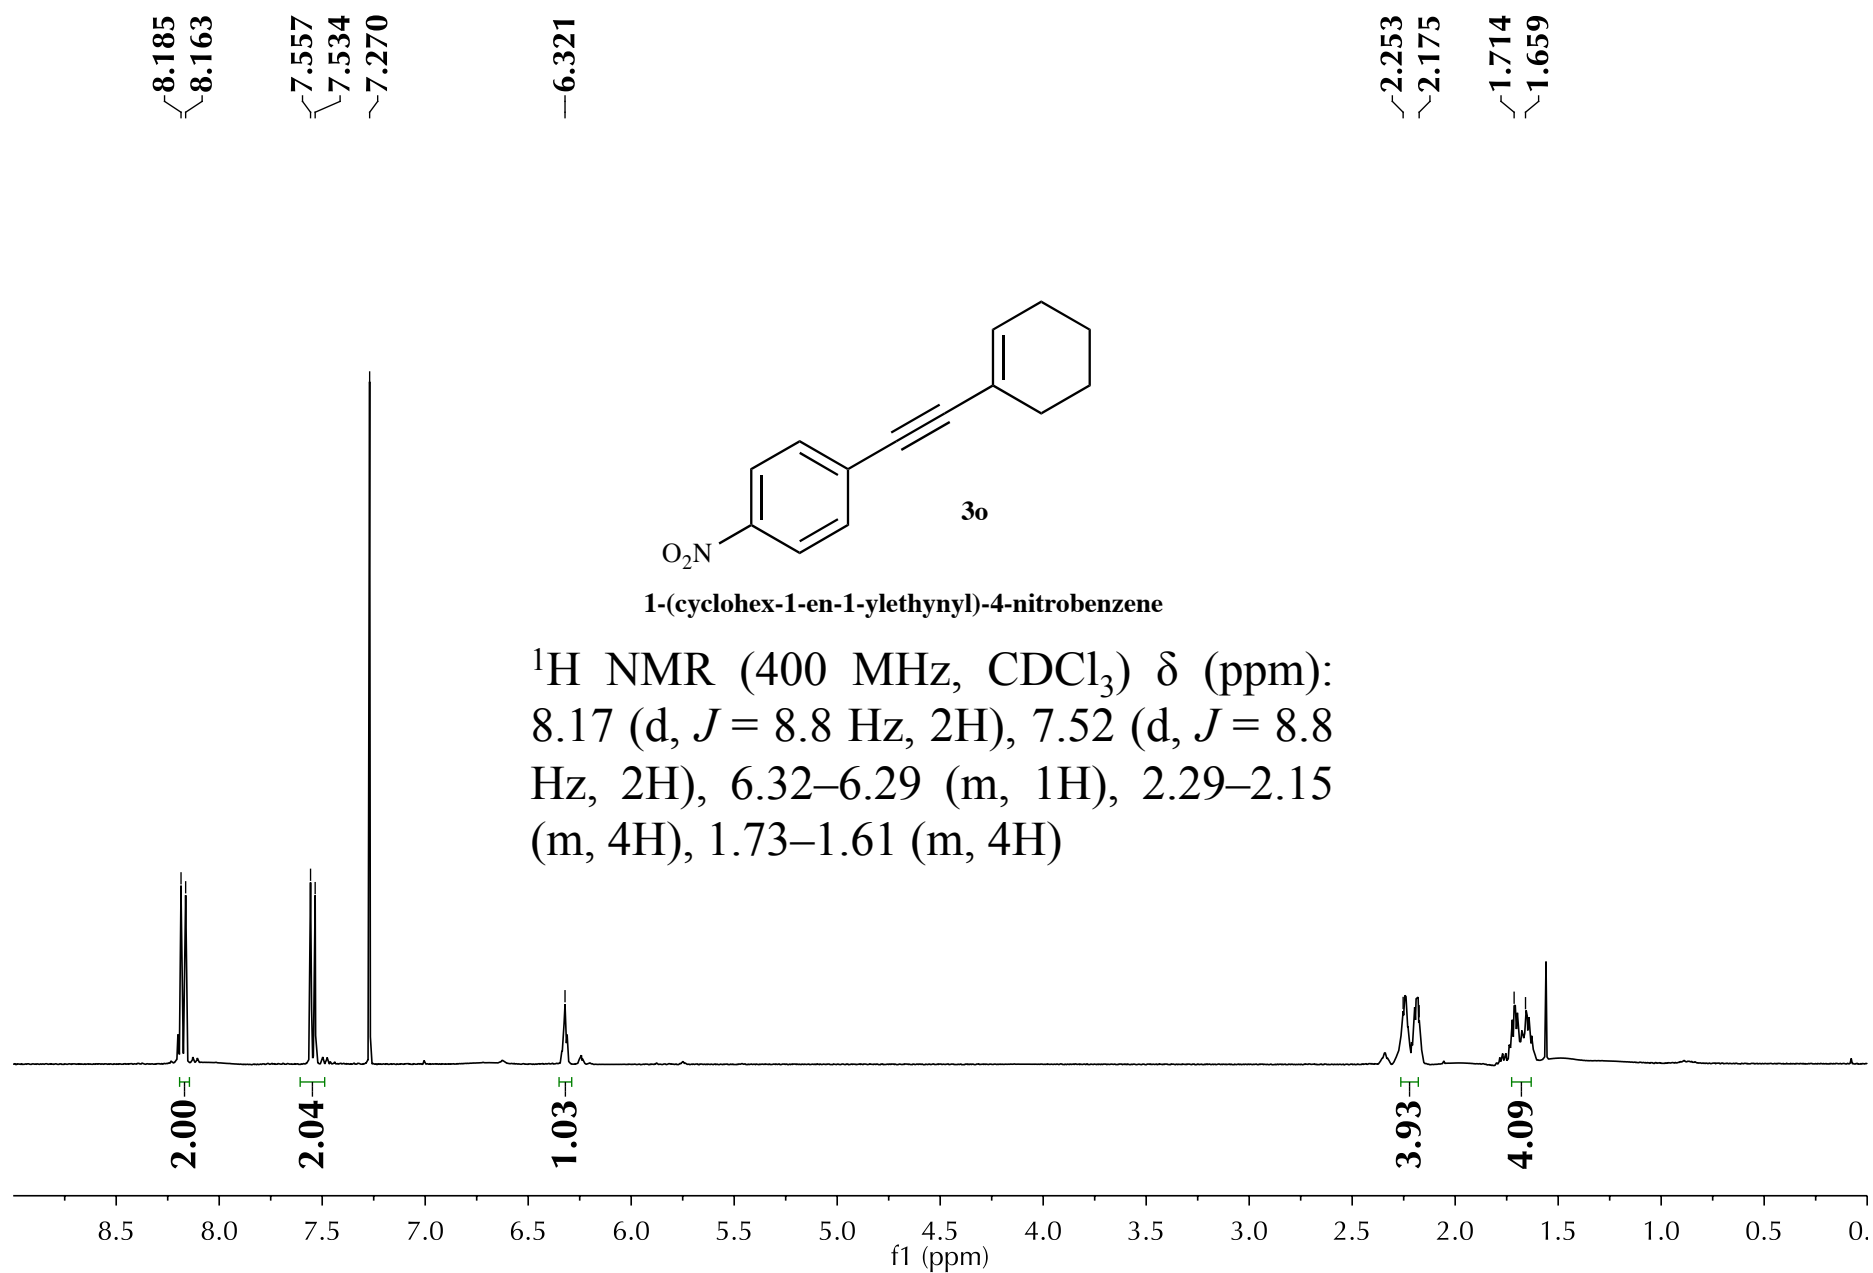

3o  
gmr-06-25-11 807 (8.726) Cm (806:808-(793:799+829:840)x1.050)

25-Jun-2014  
TOF MS EI+  
1.05e3

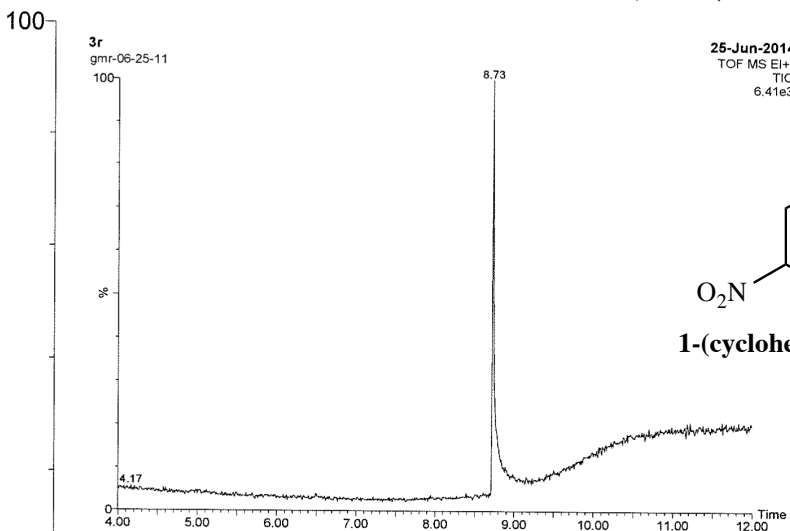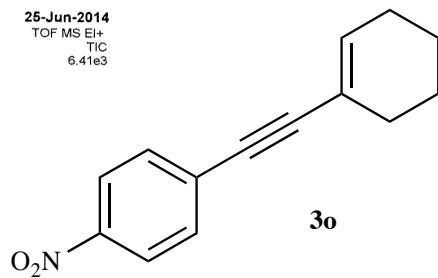

**1-(cyclohex-1-en-1-ylethynyl)-4-nitrobenzene**

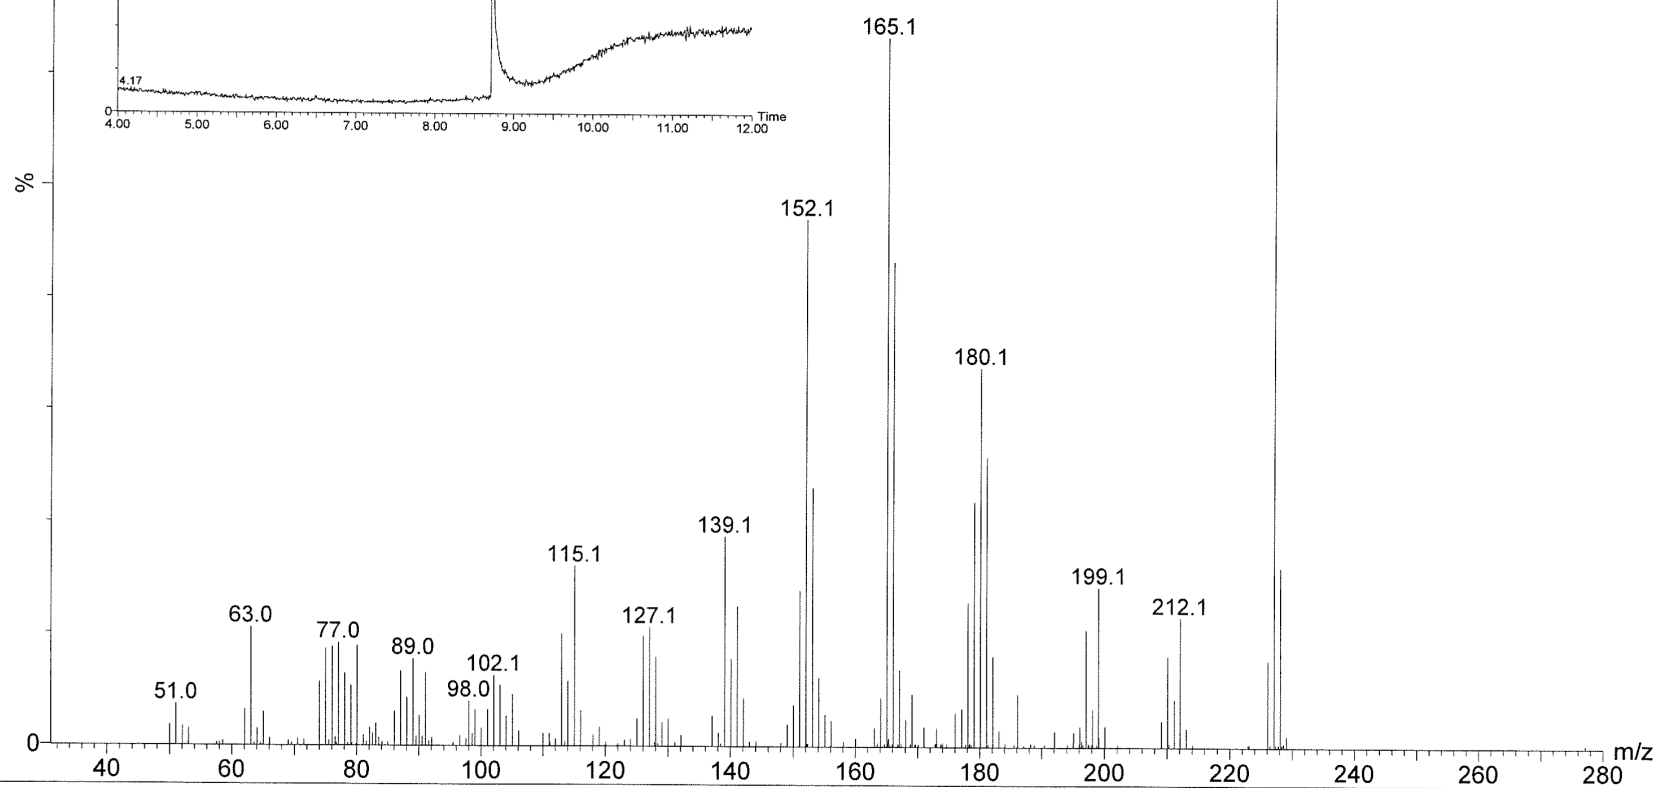

7.552  
7.531  
7.498  
7.478  
7.270

2.446  
2.428  
2.410  
1.659  
1.641  
1.622  
1.604  
1.603  
1.585  
1.478  
1.444  
1.352  
1.350  
1.326  
0.935  
0.918  
0.918  
0.900

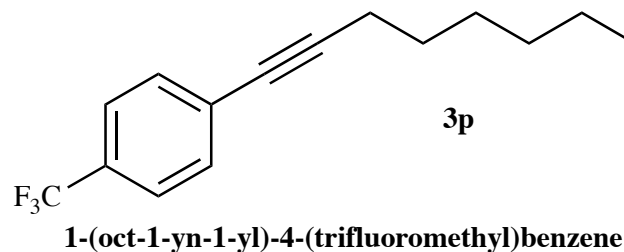

$^1\text{H}$  NMR (400 MHz,  $\text{CDCl}_3$ )  $\delta$  (ppm):  
7.54 (d,  $J = 8.0$  Hz, 2H), 7.48 (d,  $J = 8.0$  Hz, 2H), 2.43 (t,  $J = 7.0$  Hz, 2H), 1.67–1.58 (m, 2H), 1.45–1.43 (m, 2H), 1.33–1.29 (m, 4H), 0.90 (t,  $J = 6.6$  Hz, 3H)

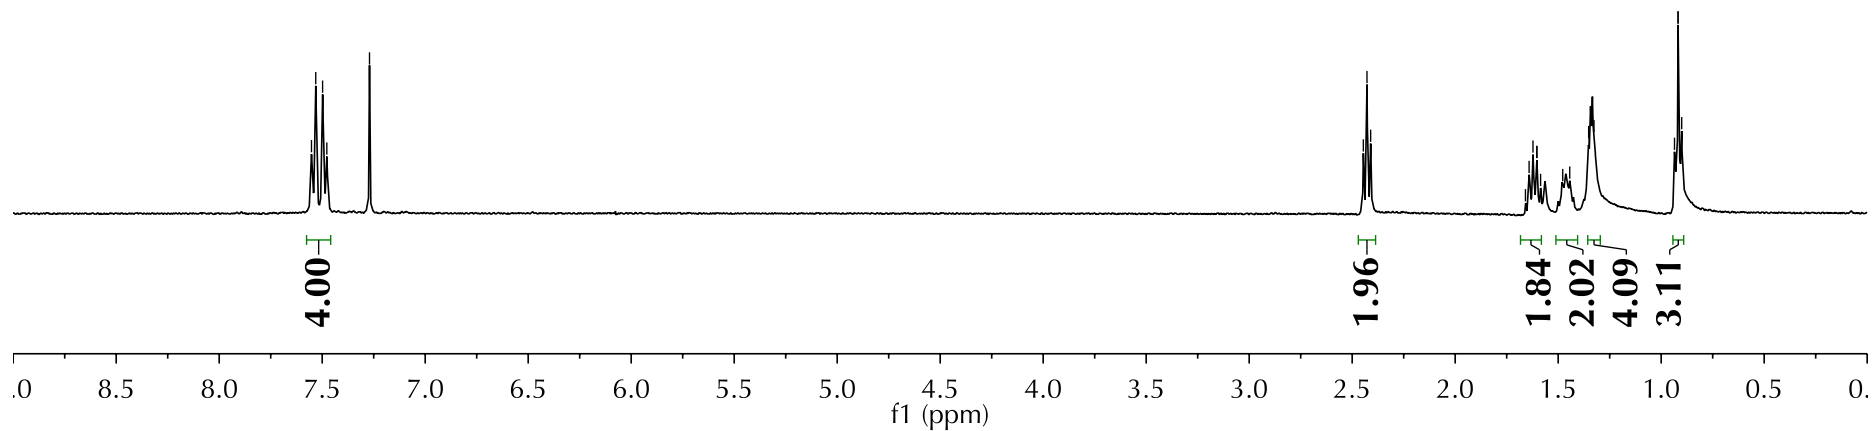



3p  
lw-06-27-08 922 (9.485)

27-Jun-2012  
TOF MS EI+  
1.57e3

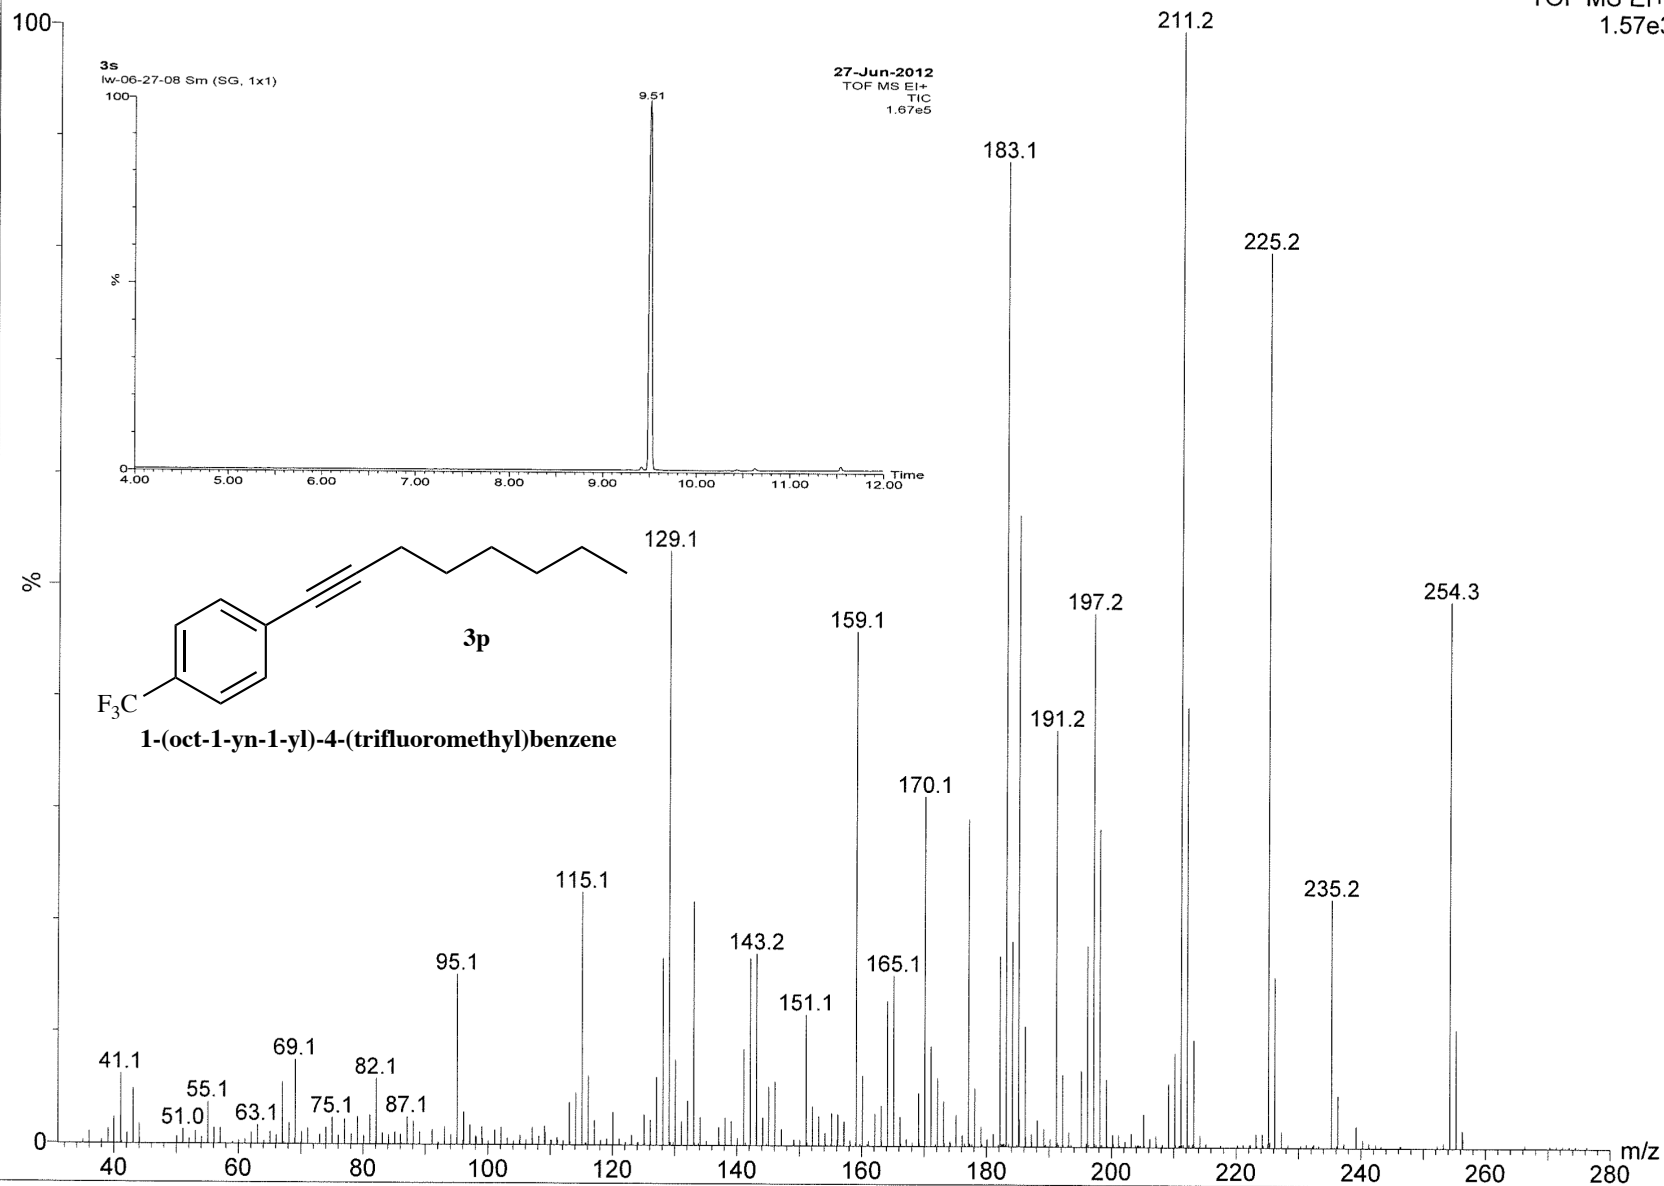

7.635  
7.626  
7.574  
7.566  
7.557  
7.550  
7.392  
7.384  
7.376  
7.270

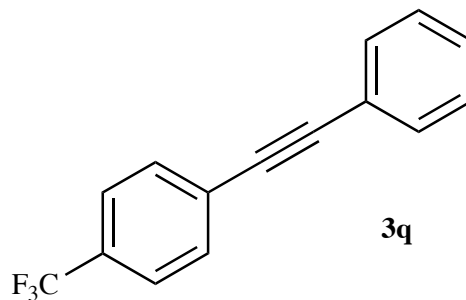

3q

1-(phenylethynyl)-4-(trifluoromethyl)benzene

$^1\text{H}$  NMR (400 MHz,  $\text{CDCl}_3$ )  $\delta$  (ppm):  
7.67–7.60 (m, 4H), 7.57–7.54 (m, 2H),  
7.40–7.36 (m, 3H)

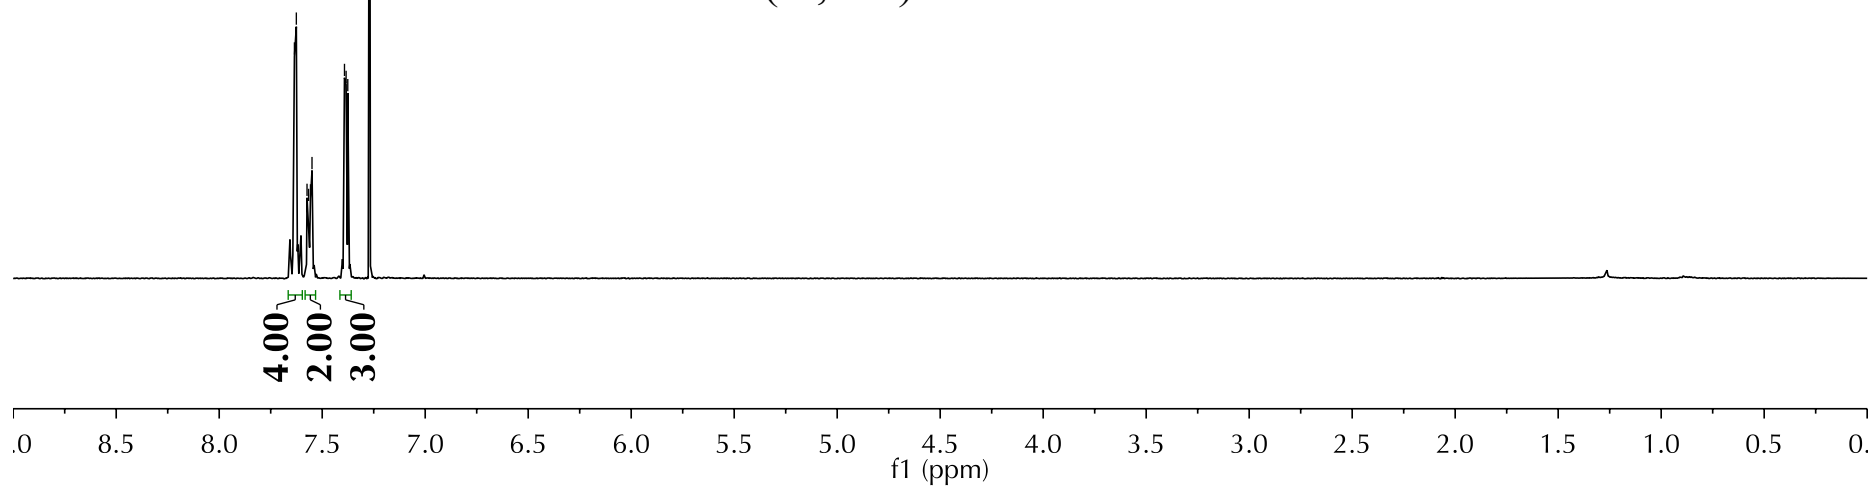

3q  
gmr-06-25-12 537 (6.475) Cm (537-(531+541:543)x1.050)

25-Jun-2014  
TOF MS EI+  
2.33e4

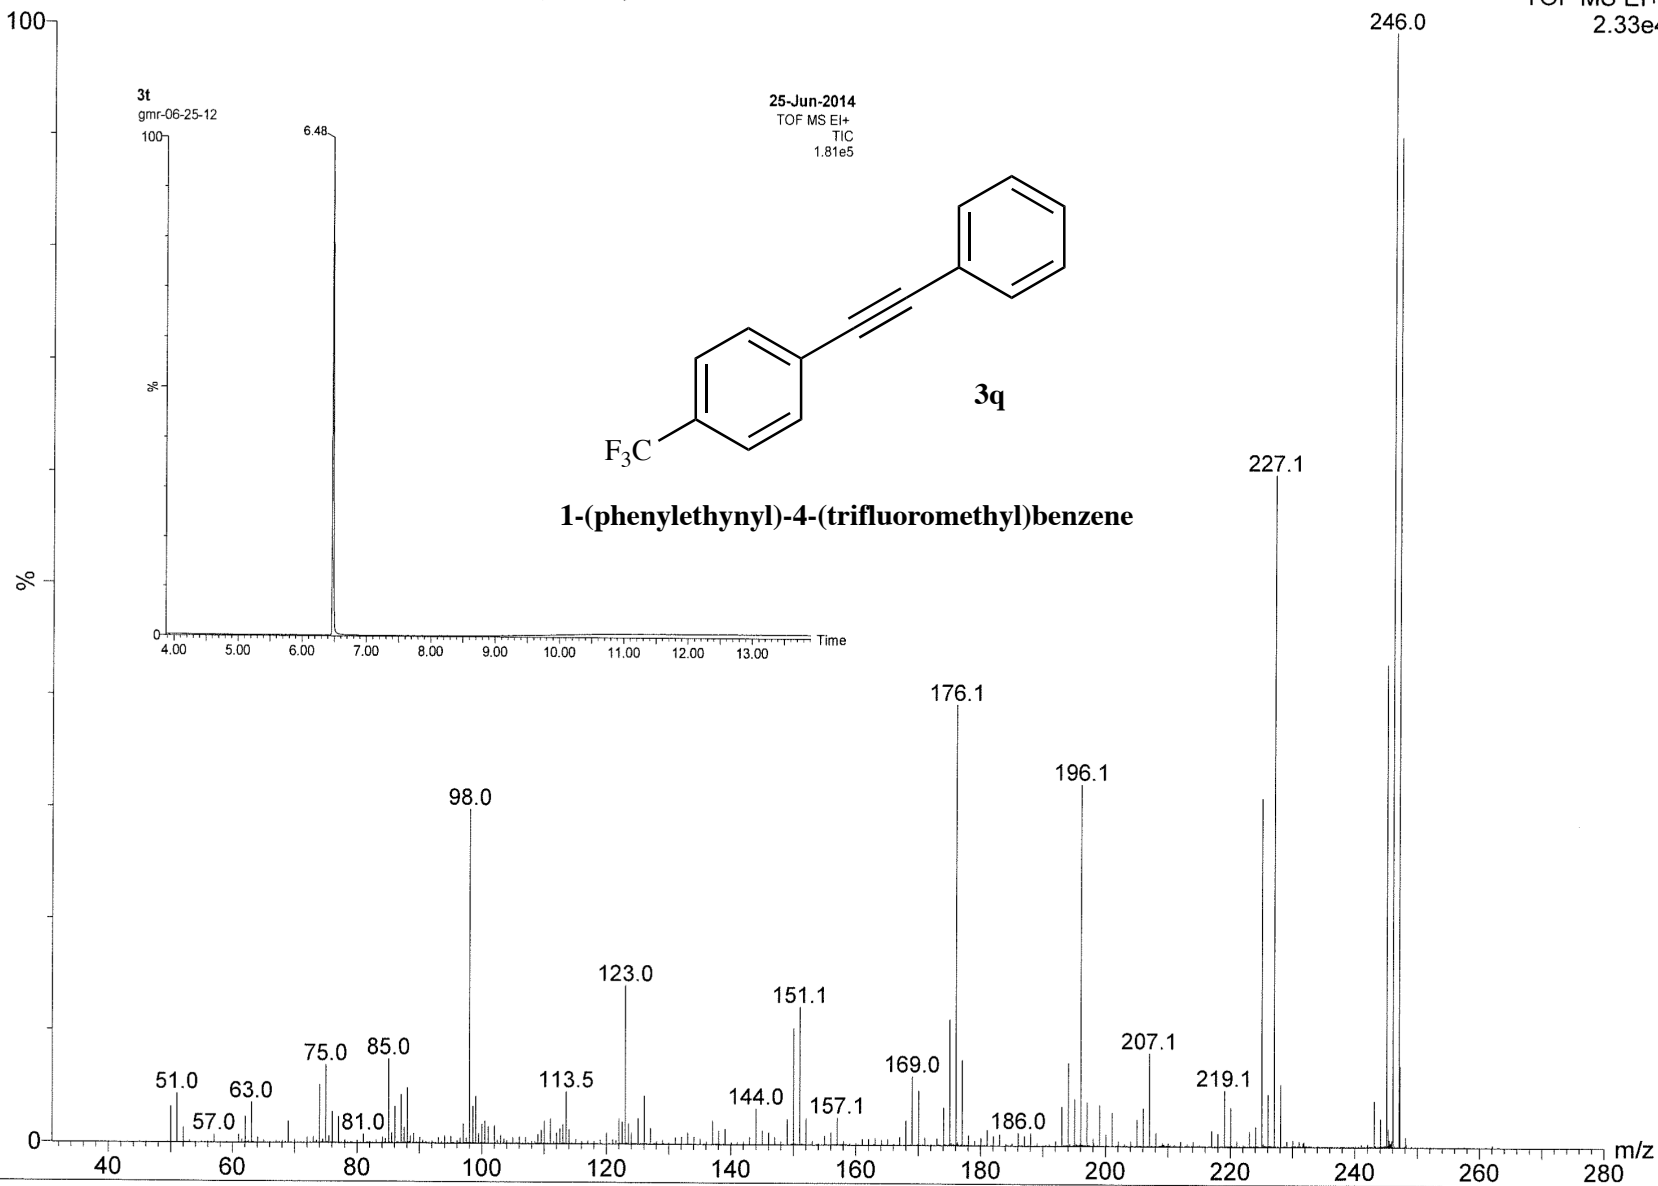

8.376  
8.355  
7.856  
7.836  
7.799  
7.779  
7.645  
7.627  
7.586  
7.568  
7.548  
7.534  
7.512  
7.494  
7.431  
7.411  
7.393  
7.270

2.603  
2.586  
2.568  
1.748  
1.730  
1.710  
1.560  
1.371  
0.963  
0.945  
0.928

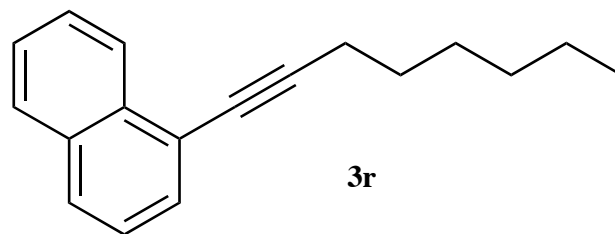

**1-(oct-1-yn-1-yl)naphthalene**

$^1\text{H}$  NMR (400 MHz,  $\text{CDCl}_3$ )  $\delta$  (ppm): 8.36 (d,  $J = 8.4$  Hz, 1H), 7.85 (d,  $J = 8.8$  Hz, 2H), 7.79 (d,  $J = 8.4$  Hz, 1H), 7.64 (d,  $J = 7.2$  Hz, 1H), 7.60–7.48 (m, 2H), 7.45–7.38 (m, 1H), 2.58 (t,  $J = 7.0$  Hz, 2H), 1.78–1.67 (m, 2H), 1.61–1.55 (m, 2H), 1.42–1.35 (m, 4H), 0.95 (t,  $J = 7.2$  Hz, 3H);

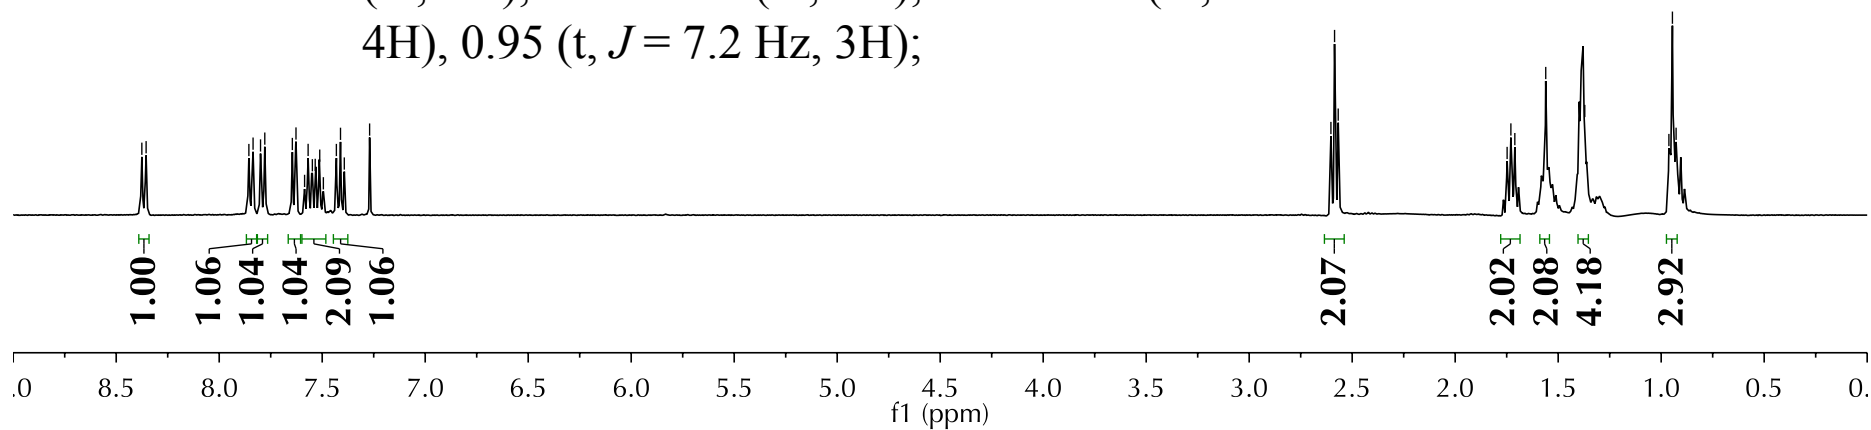

3r  
gmr-06-25-13 781 (8.509) Cm ((781+783)-(777:778+791:807)x1.050)

25-Jun-2014  
TOF MS EI+  
4.27e3

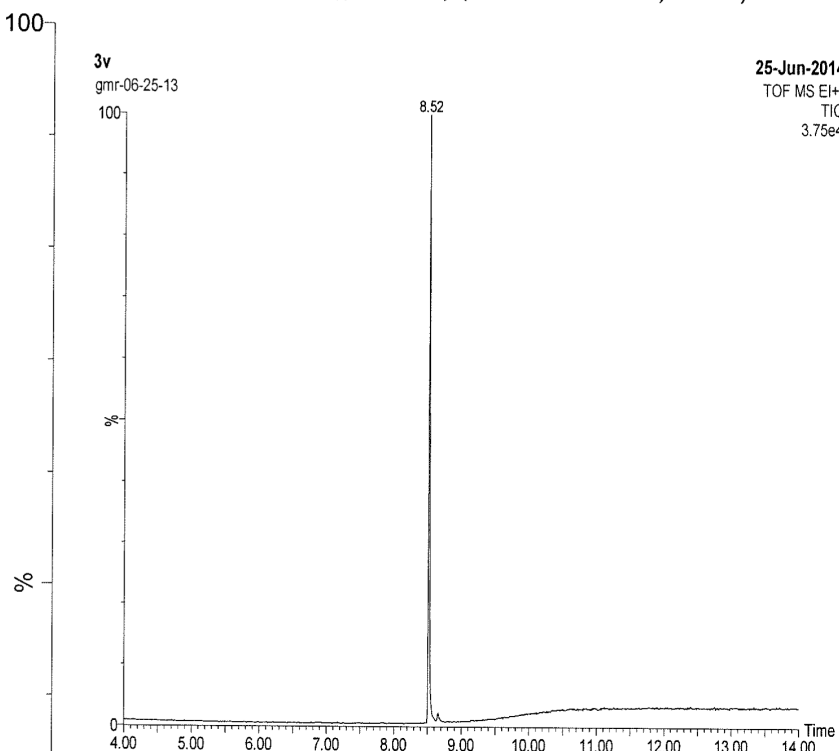

25-Jun-2014  
TOF MS EI+  
TIC  
3.75e4

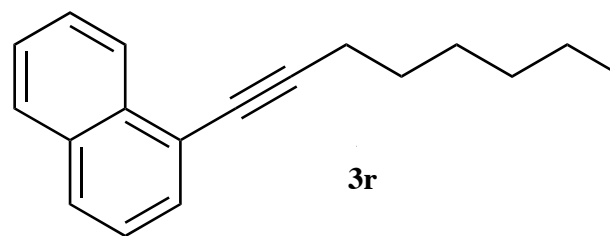

1-(oct-1-yn-1-yl)naphthalene

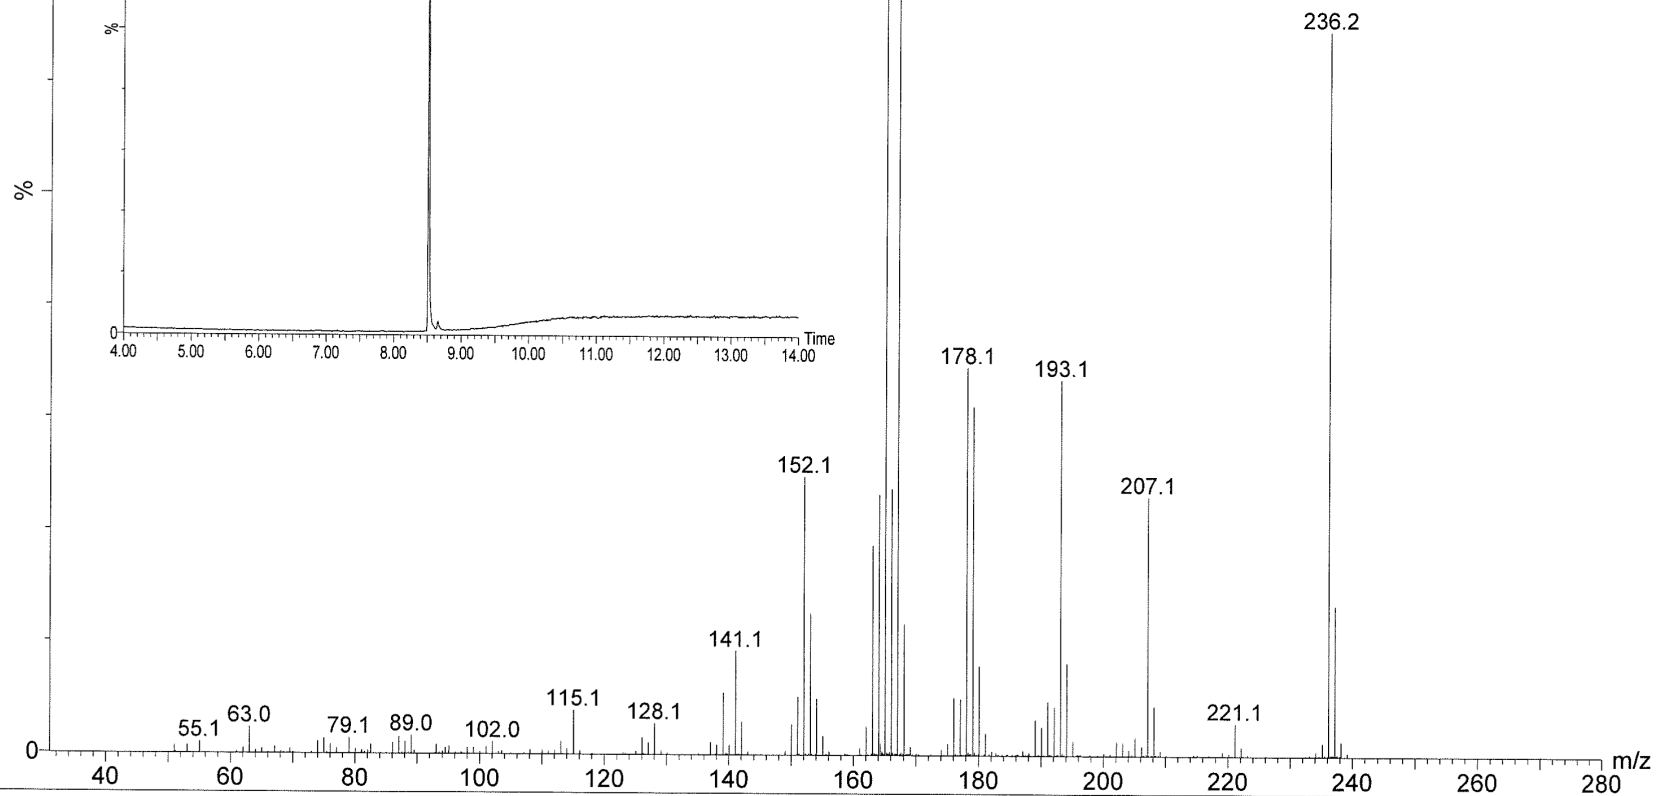

8.466  
8.445  
7.893  
7.871  
7.849  
7.788  
7.770  
7.678  
7.659  
7.634  
7.594  
7.550  
7.531  
7.496  
7.477  
7.458  
7.399  
7.270

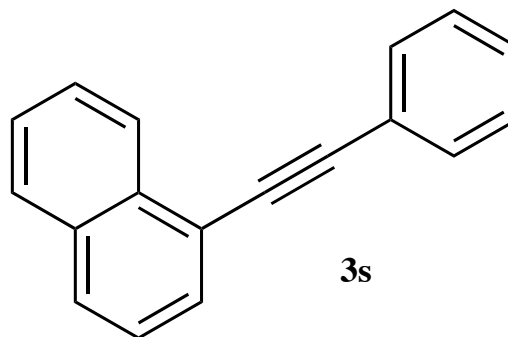

**1-(phenylethynyl)naphthalene**

$^1\text{H}$  NMR (400 MHz,  $\text{CDCl}_3$ )  $\delta$  (ppm):  
8.45 (d,  $J = 8.4$  Hz, 1H), 7.88 (t,  $J = 8.4$  Hz, 2H), 7.79 (d,  $J = 8.0$  Hz, 1H),  
7.69–7.36 (m, 8H).

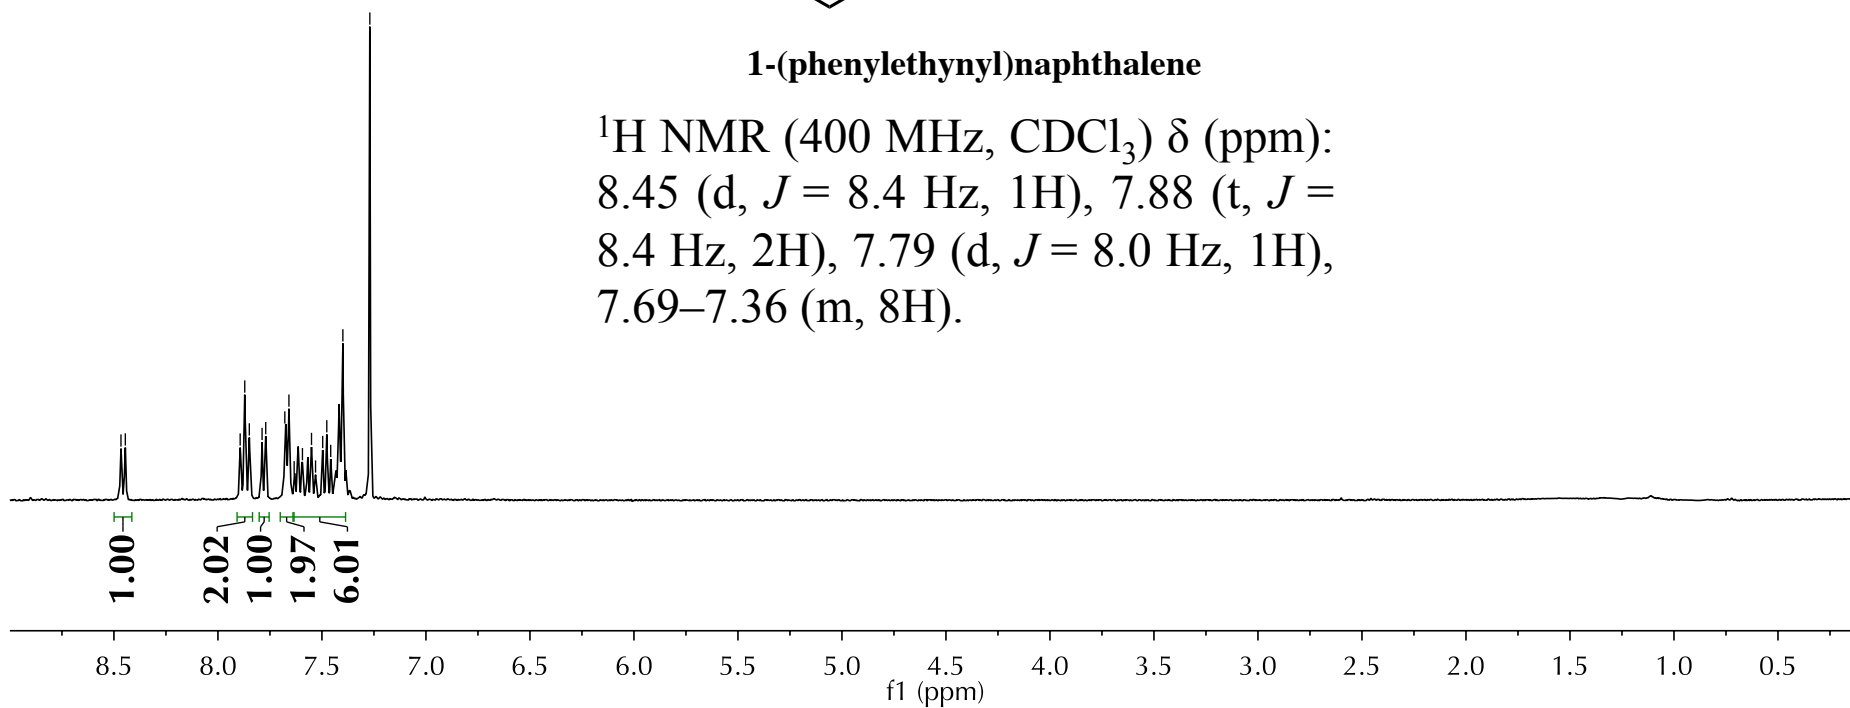

3s

gmr-06-25-14 858 (9.150) Cm ((857+858)-(862:865+851:855)x1.050)

25-Jun-2014

TOF MS EI+  
4.62e4

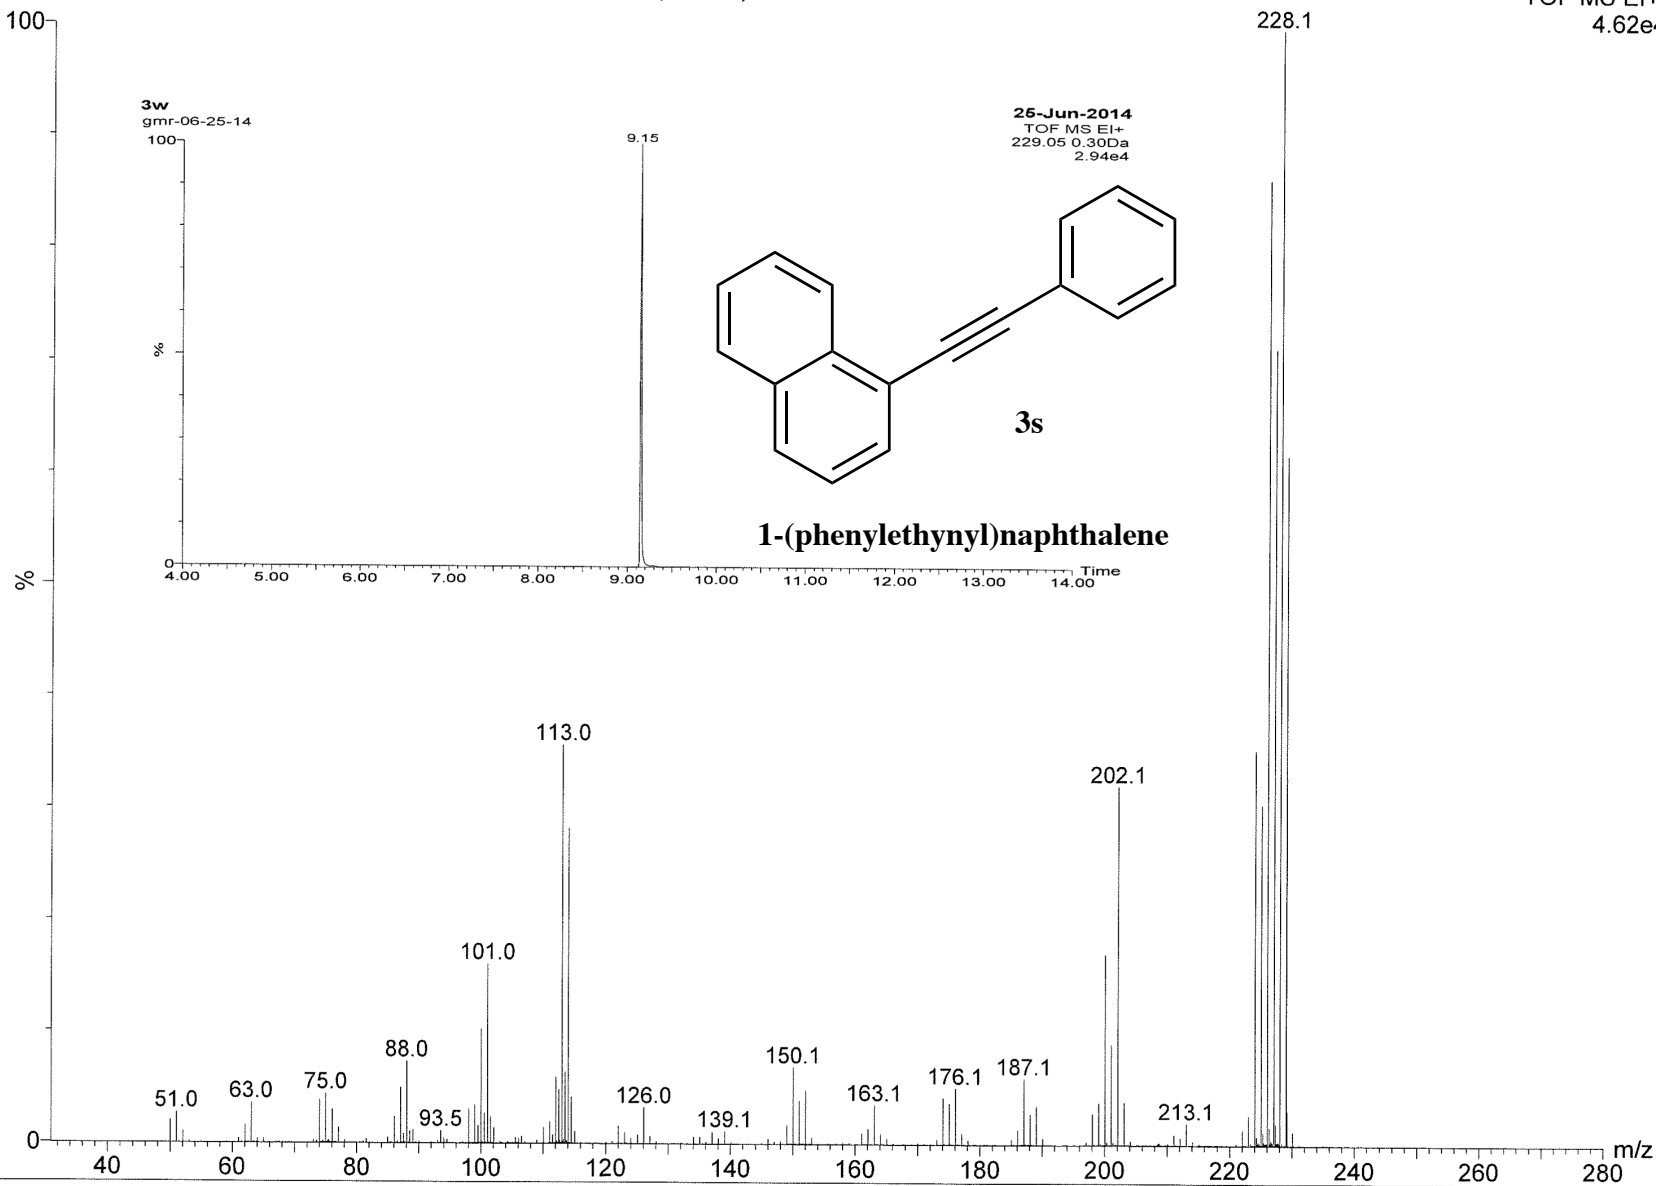

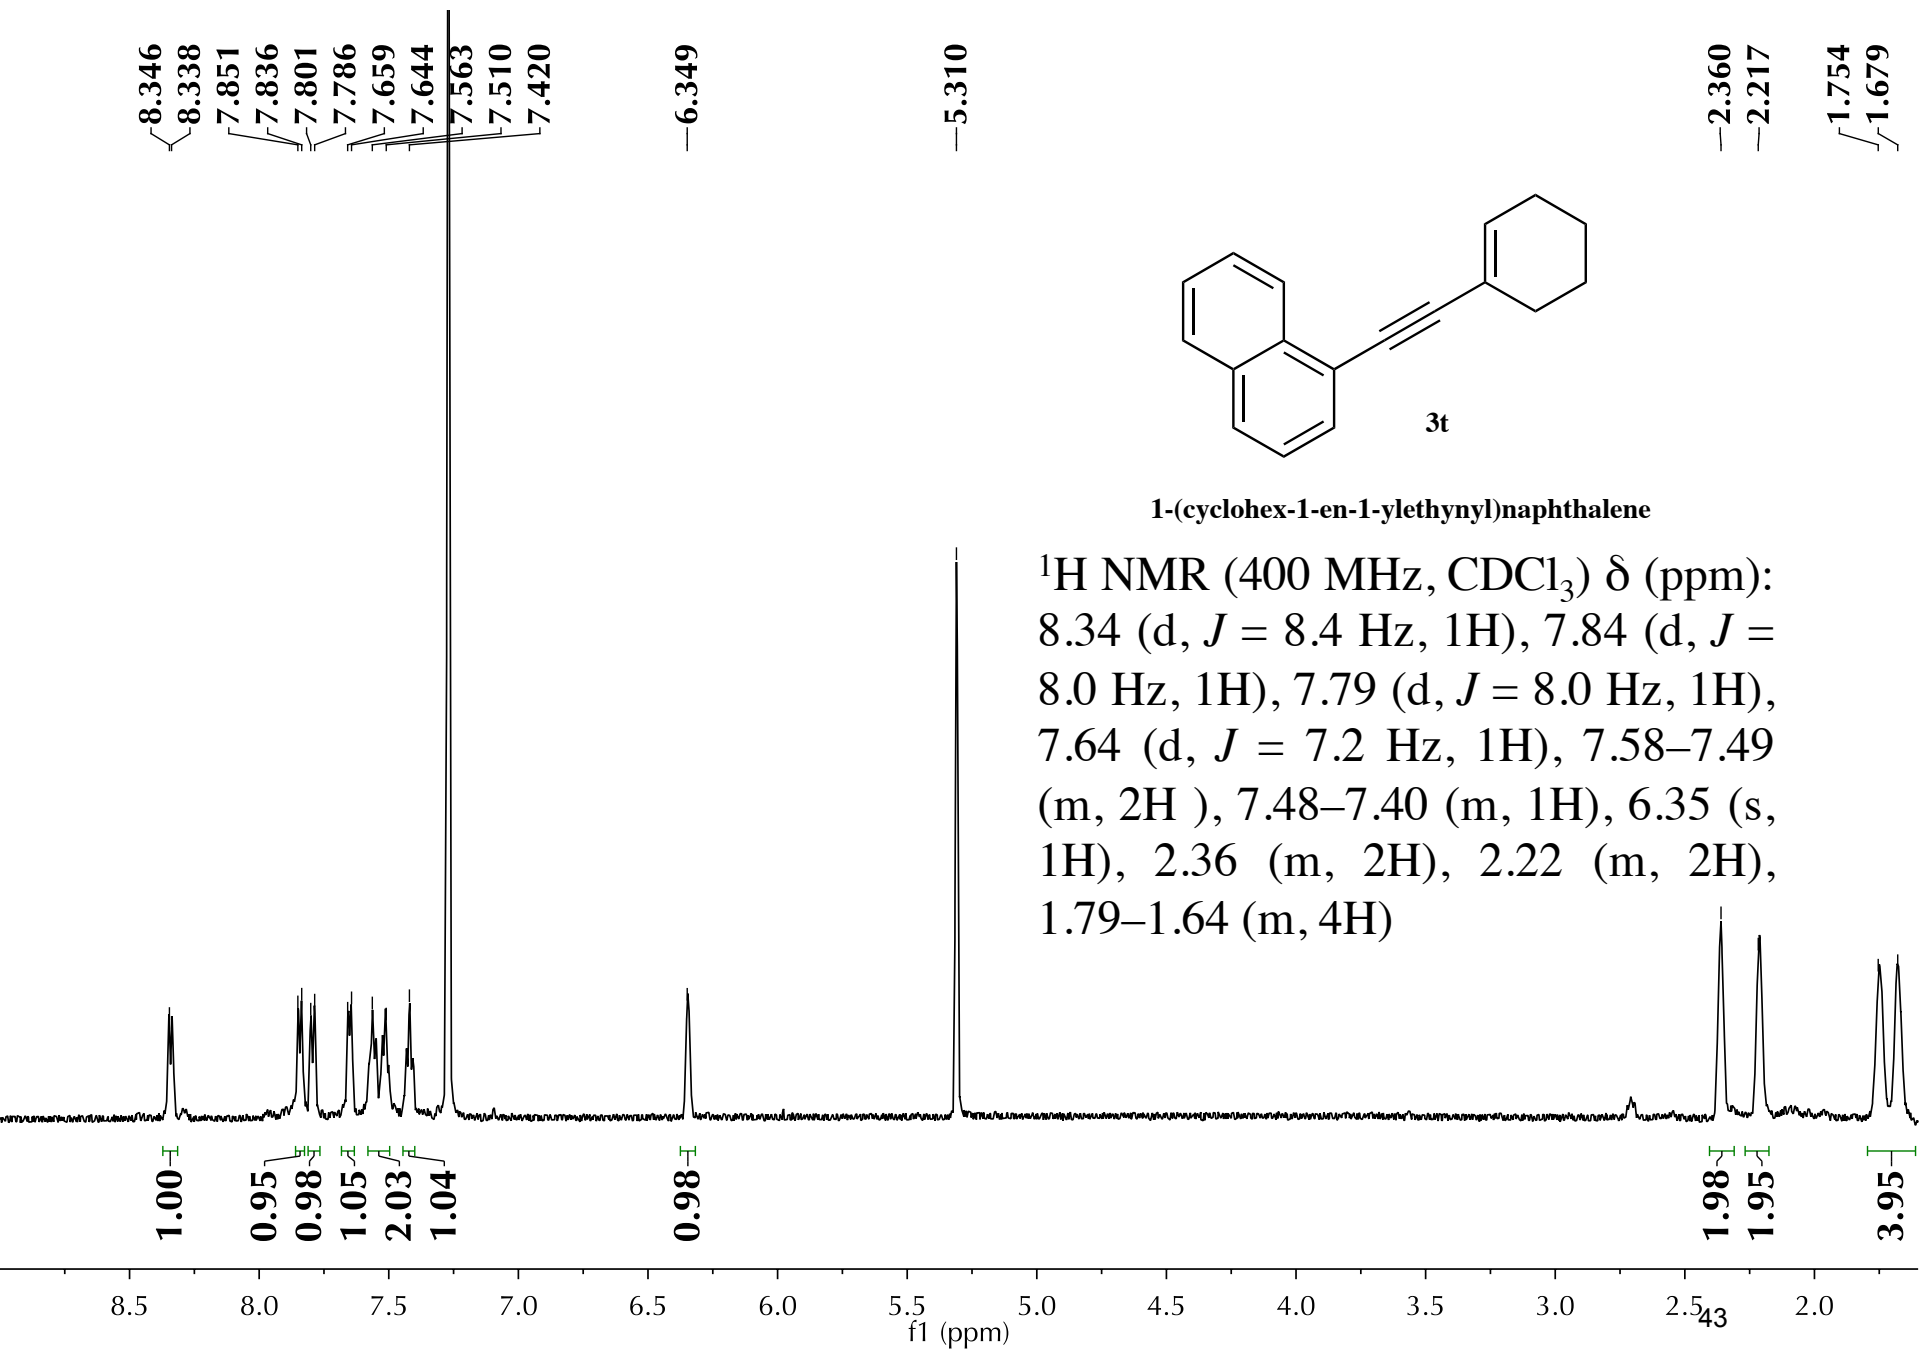



3t

gmr-06-25-15 868 (9.234) Cm ((868+870)-(855:861+875:880)x1.050)

25-Jun-2014

TOF MS EI+

1.98e4

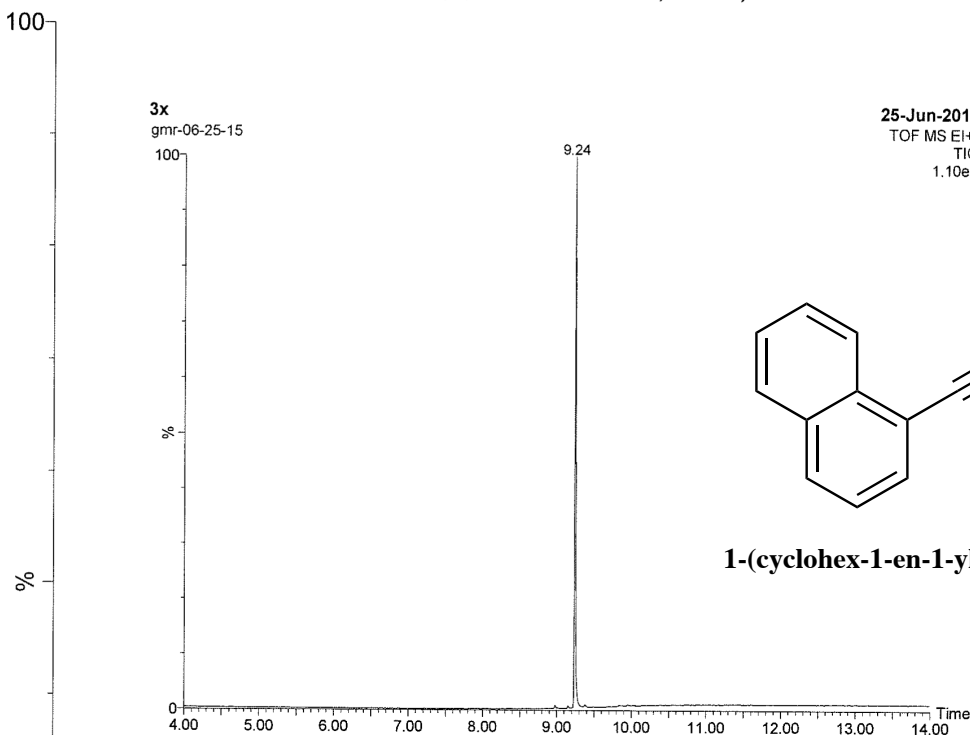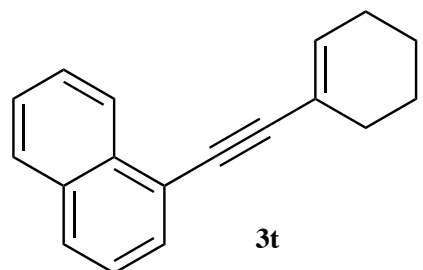

3t

1-(cyclohex-1-en-1-ylethynyl)naphthalene

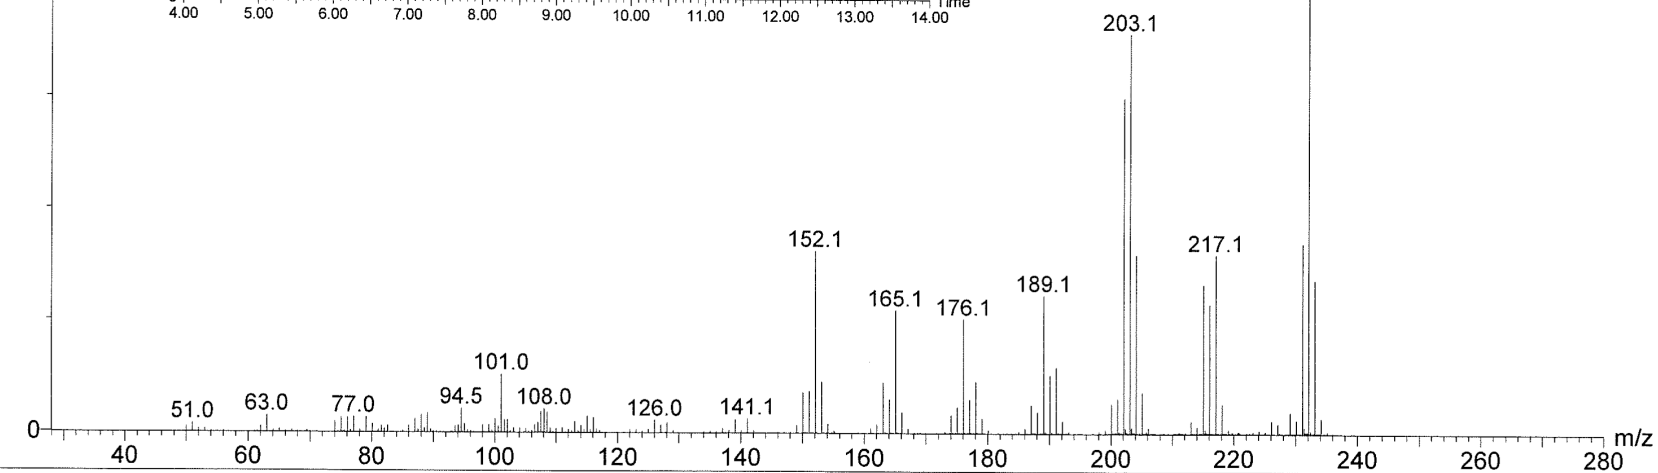

—9.992

7.816  
7.796  
7.545  
7.524  
7.270

2.465  
2.447  
2.429

1.609  
1.466  
1.333  
—0.917

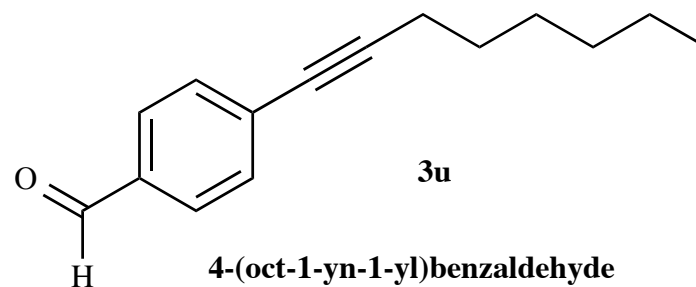

$^1\text{H}$  NMR (400 MHz,  $\text{CDCl}_3$ )  $\delta$  (ppm):  
9.99 (s, 1H), 7.80 (d,  $J = 8.3$  Hz, 2H),  
7.53 (d,  $J = 8.3$  Hz, 2H), 2.44 (t,  $J = 6.8$   
Hz, 2H), 1.68–1.58 (m, 2H), 1.50–1.42  
(m, 2H), 1.37–1.30 (m 4H), 0.91 (t,  $J =$   
7.3 Hz, 3H).

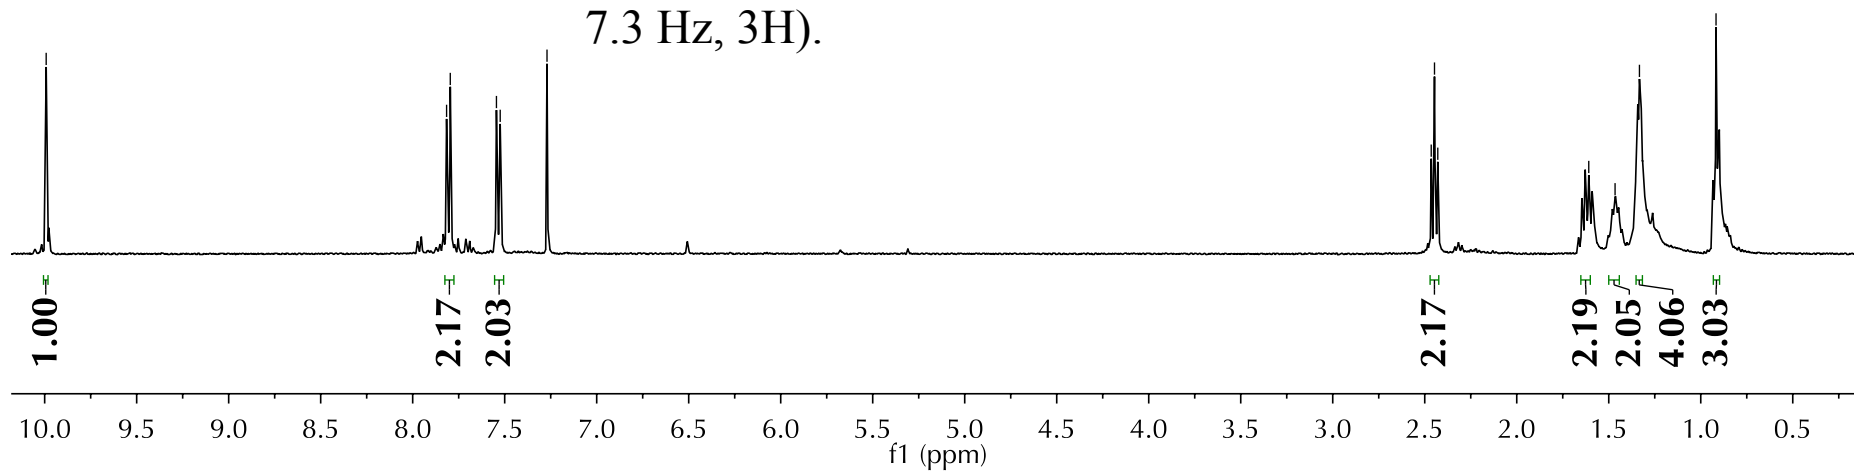

3u  
lw-06-22-01 1423 (13.659) Cm ((1418+1423)-(1383:1397+1457:1469)x1.050)

22-Jun-2012  
TOF MS EI+  
2.14e3

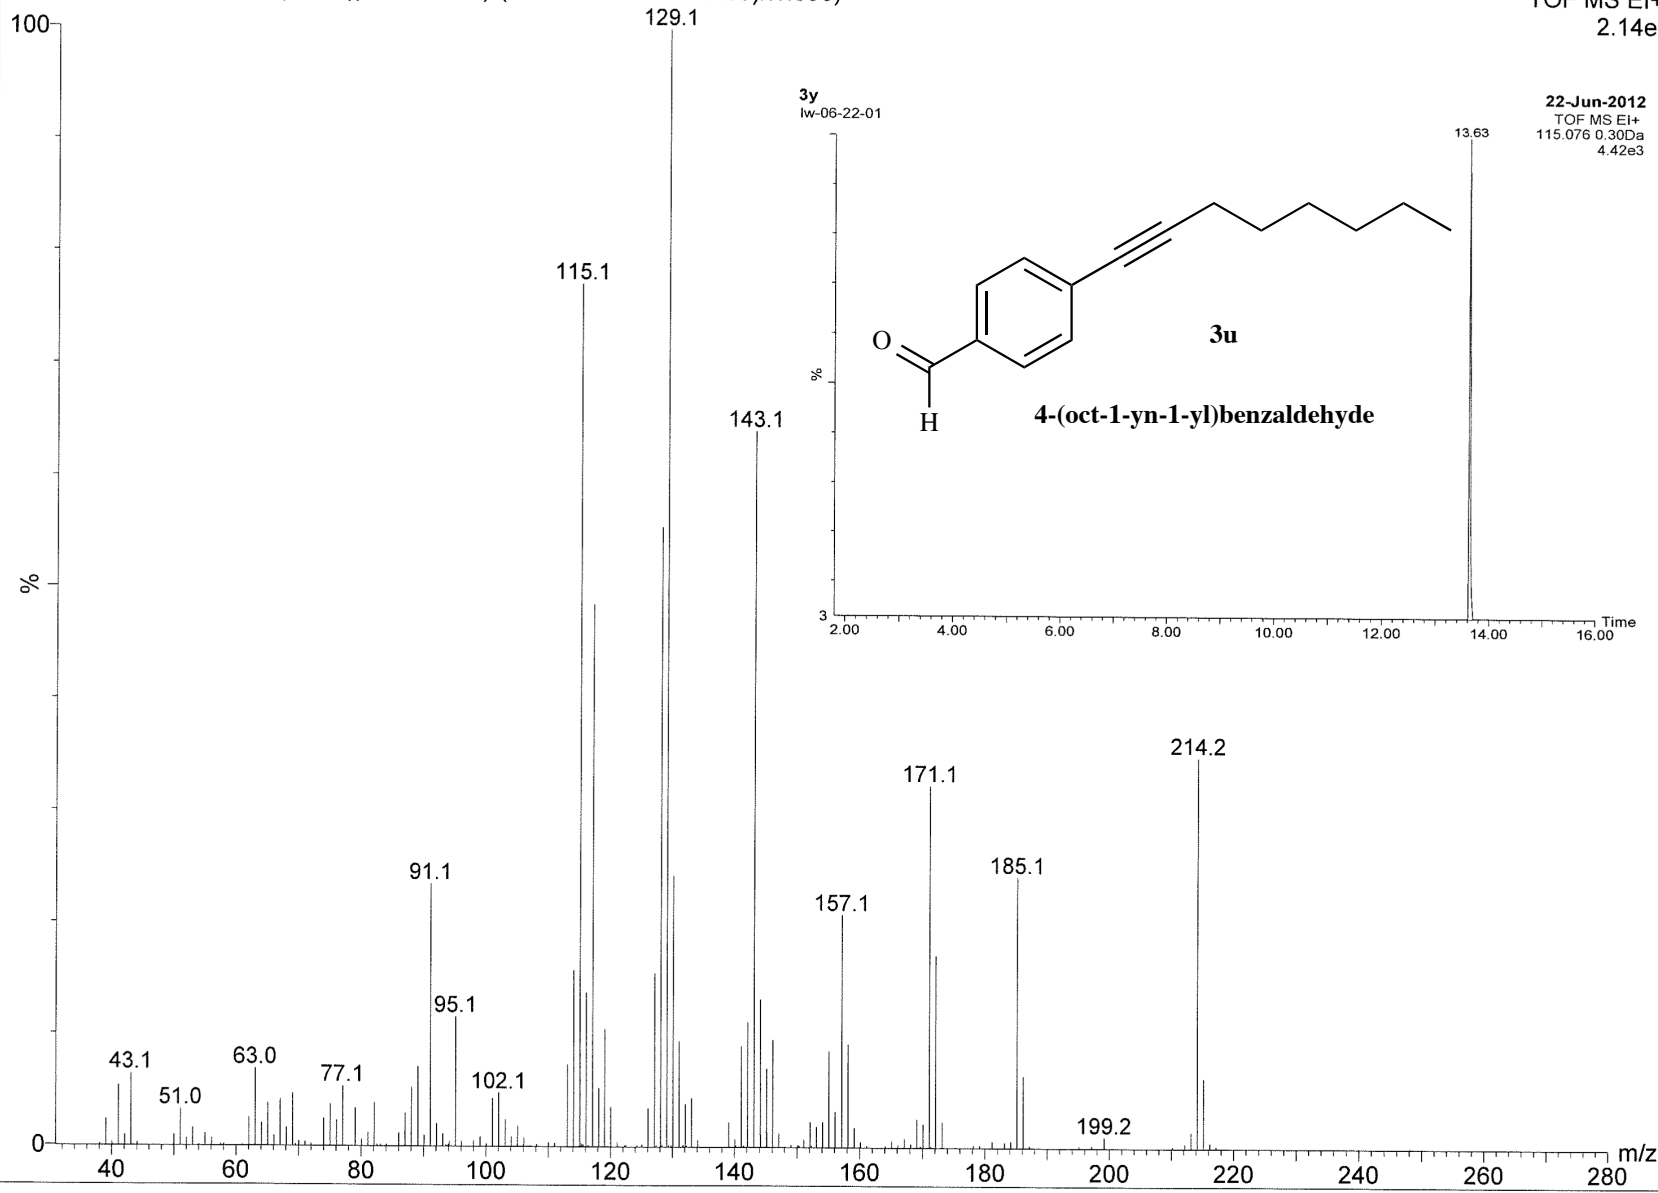

7.557  
7.554  
7.538  
7.533  
7.369  
7.355  
7.351  
7.335  
7.329  
7.270

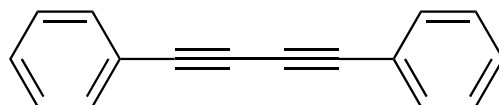

**4b**

1,4-diphenylbuta-1,3-diyne

$^1\text{H}$  NMR (400 MHz,  $\text{CDCl}_3$ )  $\delta$  (ppm):  
7.56-7.53 (m, 4H), 7.41-7.33 (m, 6H).

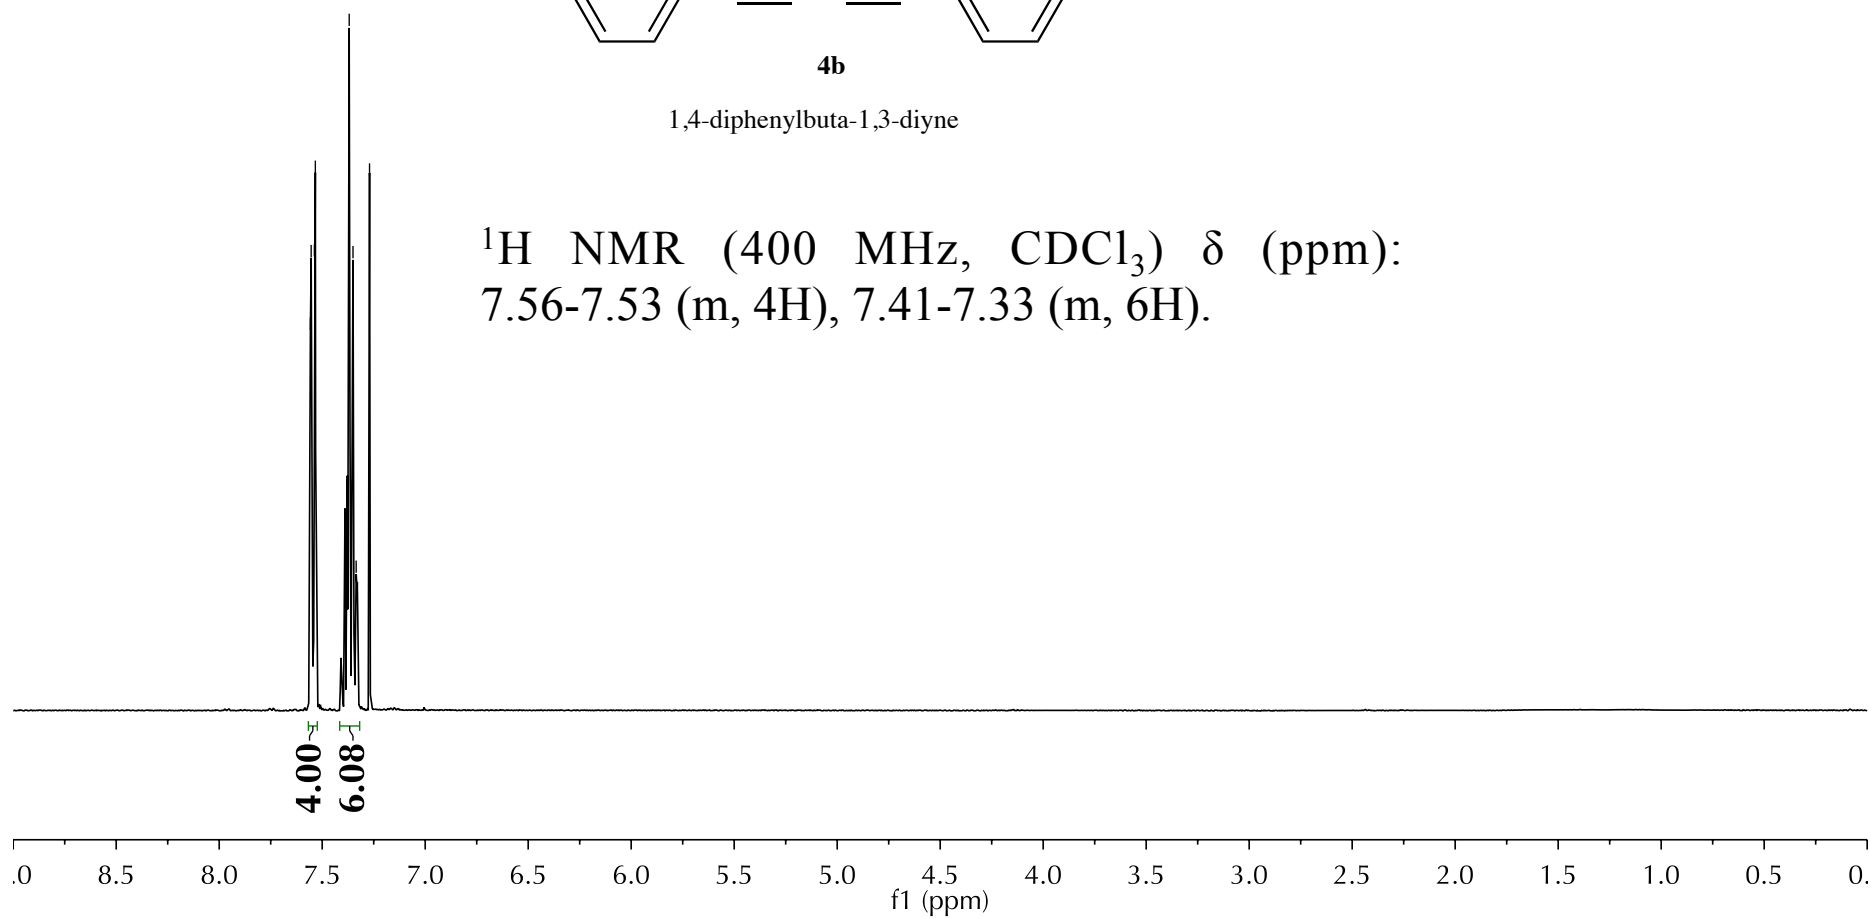

4b

gmr-06-25-16 759 (8.316) Cm ((759+763)-(753:755+767:771)x1.050)

25-Jun-2014

TOF MS EI+

2.29e4

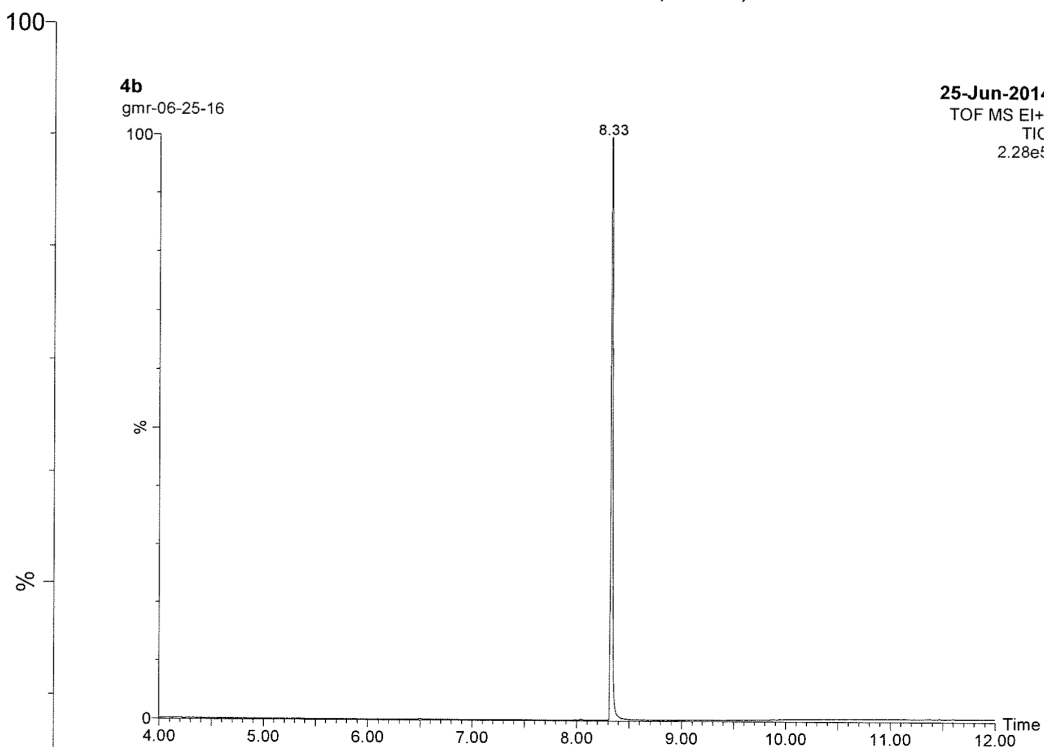

25-Jun-2014  
TOF MS EI+  
TIC  
2.28e5

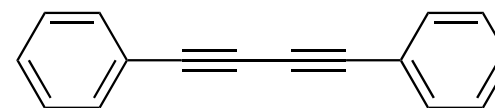

4b

1,4-diphenylbuta-1,3-diyne

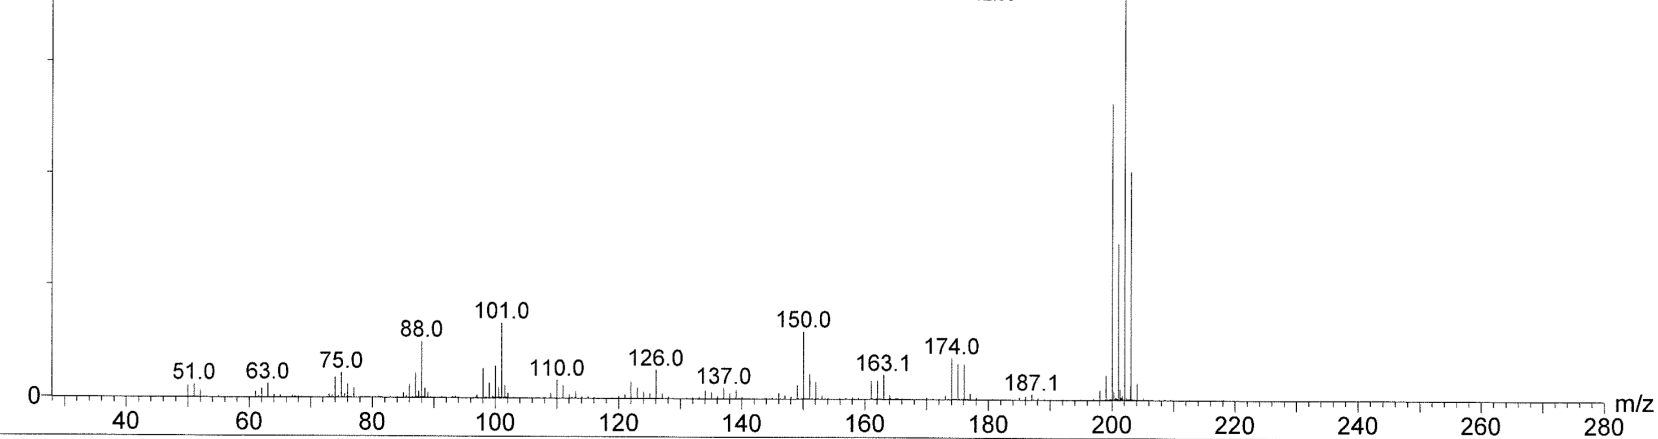

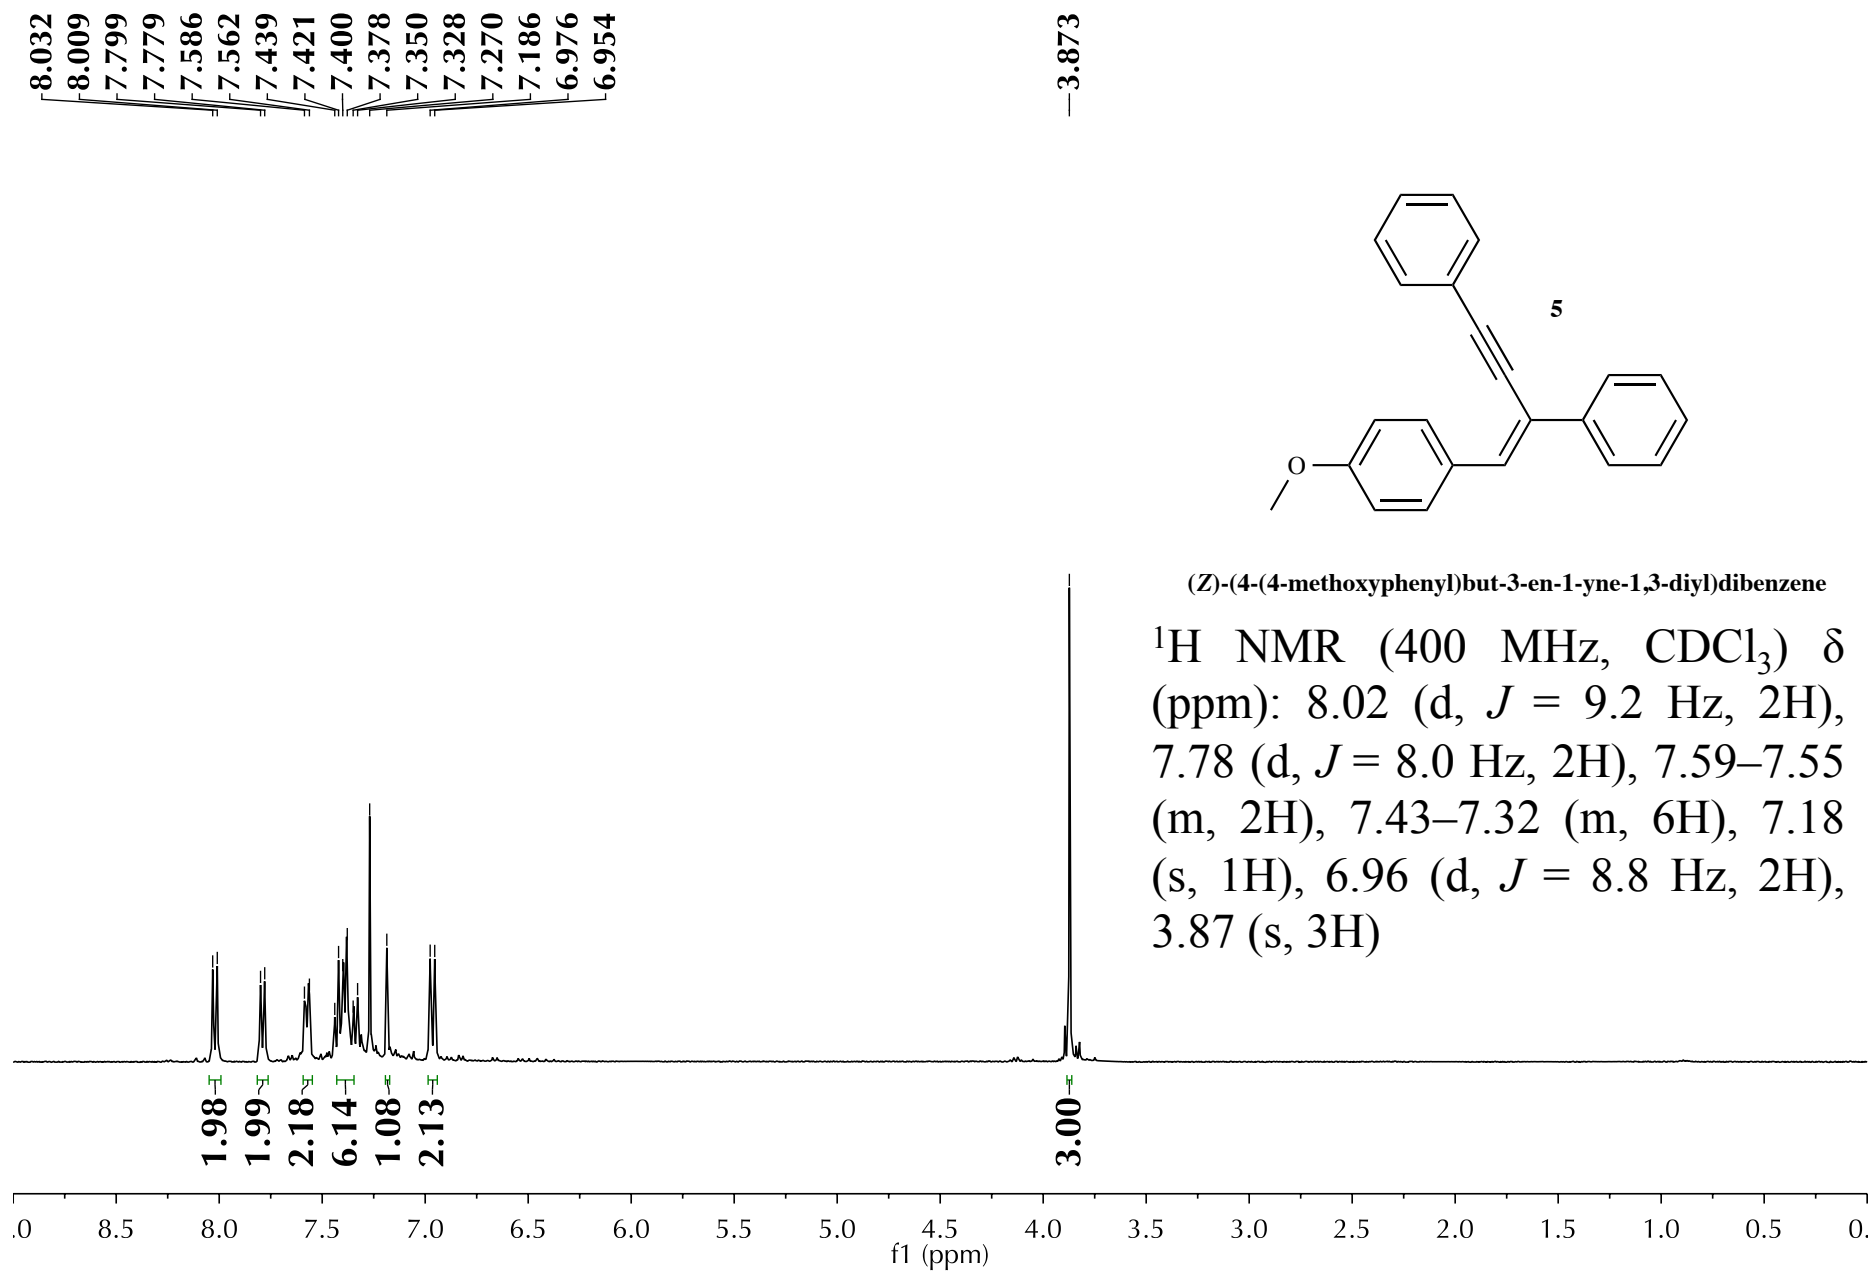

5

lw-06-22-09 1989 (18.377) Cm (1980:1995-(1972:1976+2002:2007)x1.050)

22-Jun-2012

TOF MS EI+  
1.16e4

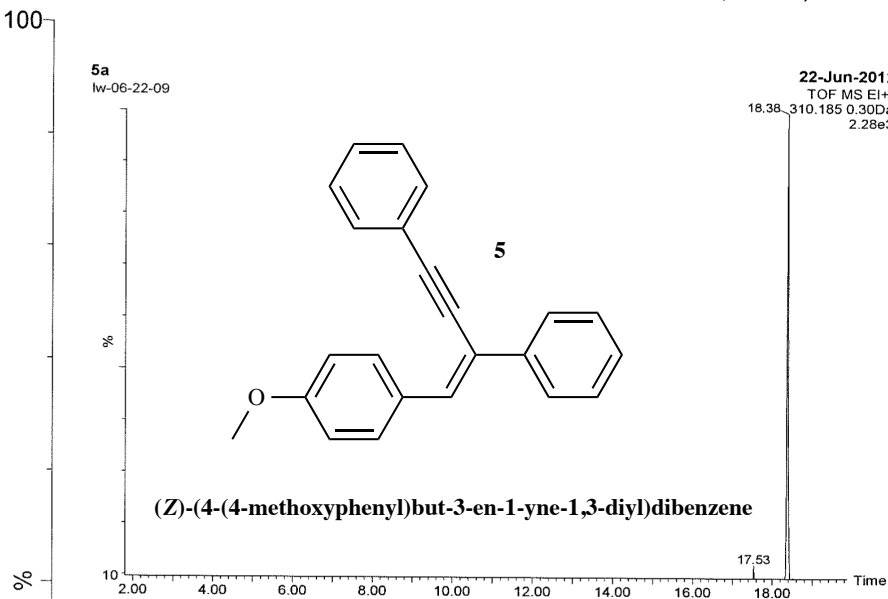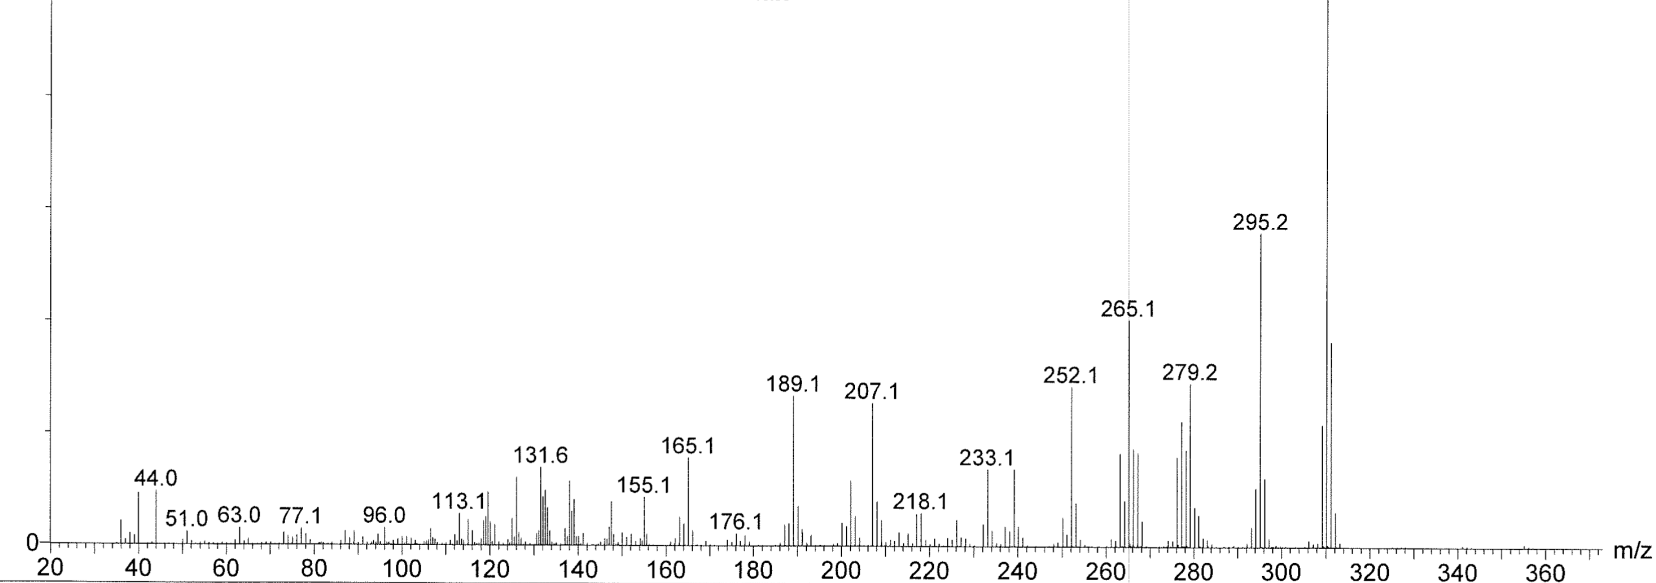

Supplement: c5ra00505a1.pdf [file c5ra00505a1.pdf]
